# Supplementary material
Source: publisher figshare collection journal article supplement (https://acs.figshare.com/ndownloader/files/4593370)

## Supporting Information

Stereoselective Monofluoromethylation of *N*-*tert*-Butylsulfinyl Ketimines Using Pregenerated Fluoro(phenylsulfonyl)methyl Anion

**Jun Liu, Laijun Zhang, and Jinbo Hu\***

*Key Laboratory of Organofluorine Chemistry, Shanghai Institute of Organic Chemistry, Chinese Academy of Sciences, Shanghai 200032, P. R. China*

## General Remarks:

The *N*-*tert*-butylsulfinyl ketimines<sup>1</sup> were prepared from the corresponding ketones according to the known condensation procedure in one step. Fluoromethyl phenyl sulfone **1**<sup>2</sup> was prepared according to the known procedures. Unless otherwise mentioned, all chemicals were purchased from commercial sources. THF was freshly distilled over sodium. Silica gel (300-400 mesh) was used for column chromatography, and in most cases petroleum ether/ethyl acetate combination was used as the eluent.

All the melting points were uncorrected. <sup>1</sup>H, <sup>13</sup>C and <sup>19</sup>F NMR spectra were recorded on 400 MHz or 300 MHz NMR spectrometer. <sup>1</sup>H NMR chemical shifts were determined relative to internal (CH<sub>3</sub>)<sub>4</sub>Si (TMS) at  $\delta$  0.0 or to the signal of a residual protonated solvent: CDCl<sub>3</sub>  $\delta$  7.26. <sup>13</sup>C NMR chemical shifts were determined relative to internal TMS at  $\delta$  0.0. <sup>19</sup>F NMR chemical shifts were determined relative to CFCI<sub>3</sub> at  $\delta$  0.0. Chemical shifts are reported in ppm. Mass spectra were obtained on a mass spectrometer. High-resolution mass data were recorded on a high-resolution mass spectrometer in the EI, ESI or MALDI mode.

## Typical procedure for stereoselective nucleophilic monofluoromethylation of *N*-*tert*-butylsulfinyl ketimines using fluoromethyl phenyl sulfone:

**Condition A (*n*BuLi as a base):** Under N<sub>2</sub> atmosphere, *n*-butyllithium in hexane (1.3 mmol) was added dropwise into the THF (8 mL) solution of fluoromethyl phenyl sulfone (209 mg, 1.2 mmol) at  $-78^{\circ}\text{C}$ , and after 30 min at that temperature, *N*-*tert*-butylsulfinyl ketimine (1.0 mmol) in 2mL THF was added slowly into the solution. The reaction mixture was then stirred vigorously at  $-78^{\circ}\text{C}$  for 1 h , followed by adding a saturated NaCl water solution (10 mL). The solution mixture was extracted with Et<sub>2</sub>O (10 mL $\times$ 3), and the combined organic phase was dried over MgSO<sub>4</sub>. After the removal of volatile solvents under vacuum, the crude product was further purified by silica gel column chromatography to give product **4'** and **4''**.

**Condition B (KHMDS as a base):** Under N<sub>2</sub> atmosphere, KHMDS in toluene (1.1 mmol) was added dropwise into the THF (4 mL) solution of fluoromethyl phenyl sulfone (174 mg, 1.0 mmol) at  $-78^{\circ}\text{C}$ , and after 30 min at that temperature, *N*-*tert*-butylsulfinyl ketimine (0.5 mmol) in 1 mL of THF was added slowly into the solution. The reaction mixture was then stirred vigorously at  $-78^{\circ}\text{C}$  for 2 h , followed by adding a saturated NaCl water solution (10 mL). The solution mixture was

extracted with Et<sub>2</sub>O (10 mL×3), and the combined organic phase was dried over MgSO<sub>4</sub>. After the removal of volatile solvents under vacuum, the crude product was further purified by silica gel column chromatography to give product **4'** and **4''**.

#### Sulfonamide **4a'**+**4a''**:

Using the typical procedure as condition A, the crude product was purified by silica gel column chromatography to afford two diastereoisomers **4a'** (198 mg) and **4a''** (158 mg) respectively, overall yield 90%.

Using the typical procedure as condition B, the crude product was purified by silica gel column chromatography to afford two diastereoisomers **4a'** (97mg) and **4a''** (30 mg) respectively, overall yield 64%.

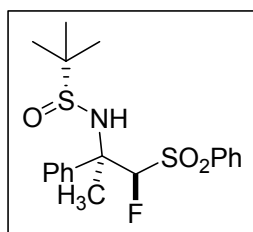

**4a'**

White solid. mp 161–163 °C.  $[\alpha]_D^{25} = -72.06$  (c = 0.98, CHCl<sub>3</sub>); <sup>1</sup>H NMR: δ 7.81 (d, *J* = 7.5 Hz, 2H), 7.62 (t, *J* = 7.5 Hz, 1H), 7.53–7.58 (m, 2H), 7.49 (t, *J* = 7.8 Hz, 2H), 7.31–7.37 (m, 3H), 5.81 (d, *J* = 45.0 Hz, 1H), 5.73 (brs, 1H), 1.97 (d, *J* = 2.4 Hz, 3H), 1.41 (s, 9H); <sup>19</sup>F NMR: δ –174.4 (d, *J* = 44.9 Hz, 1F); <sup>13</sup>C NMR: δ 139.7, 137.4, 134.3, 129.2, 129.0, 128.4, 128.3, 126.56, 126.52, 105.4 (d, *J* = 236.6 Hz), 62.4 (d, *J* = 16.7 Hz), 56.7, 25.4 (d, *J* = 4.8 Hz), 23.1; IR (KBr): 3293–2982–497, 1447, 1329, 1164, 1050, 569 cm<sup>–1</sup>; Anal. Calcd. for C<sub>19</sub>H<sub>24</sub>FNO<sub>3</sub>S<sub>2</sub>: C, 57.41; H, 6.09; N, 3.52; Found C, 57.46; H, 6.10; N, 3.55; MS (ESI, *m/z*) 398.1 (M<sup>+</sup>+1).

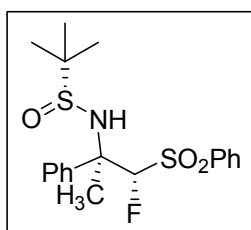

**4a''**

White solid. mp 155–156 °C.  $[\alpha]_D^{25} = -85.68$  ( $c = 0.94$ ,  $\text{CHCl}_3$ );  $^1\text{H}$  NMR:  $\delta$  7.94 (d,  $J = 7.8$  Hz, 2H), 7.71 (t,  $J = 7.5$  Hz, 1H), 7.58 (t,  $J = 7.8$  Hz, 2H), 7.46–7.51 (m, 2H), 7.33–7.41 (m, 3H), 5.35 (brs, 1H), 5.18 (d,  $J = 44.1$  Hz, 1H), 2.15 (s, 3H), 1.30 (s, 9H);  $^{19}\text{F}$  NMR:  $\delta$  -178.2 (d,  $J = 45.7$  Hz, 1F);  $^{13}\text{C}$  NMR:  $\delta$  138.9, 137.2, 134.9, 129.5, 129.1, 128.7, 128.6, 127.8, 104.4 (d,  $J = 228.2$  Hz), 63.5 (d,  $J = 21.9$  Hz), 56.8, 22.9, 22.8; IR (KBr): 3271, 2938, 1585, 1475, 1450, 1327, 1150, 1057, 797, 686, 601  $\text{cm}^{-1}$ ; Anal. Calcd. for  $\text{C}_{19}\text{H}_{24}\text{FNO}_3\text{S}_2$ : C, 57.41; H, 6.09; N, 3.52; Found C, 57.42; H, 6.24; N, 3.32; MS (ESI,  $m/z$ ) 398.1 ( $\text{M}^+ + 1$ ).

#### Sulfonamide **4b'**+**4b''**:

Using the typical procedure as condition A, the crude product was purified by silica gel column chromatography to afford two diastereoisomers **4b'** (185 mg) and **4b''** (151 mg) respectively, overall yield 81%.

Using the typical procedure as condition B, the crude product was purified by silica gel column chromatography to afford two diastereoisomers **4b'** (83 mg) and **4b''** (52 mg) respectively, overall yield 65%.

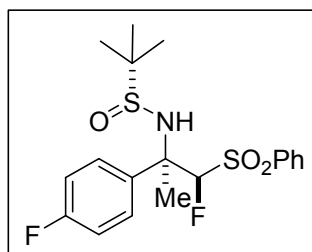

**4b'**

White solid. mp 178–180 °C.  $[\alpha]_D^{25} = -70.96$  ( $c = 0.98$ ,  $\text{CHCl}_3$ );  $^1\text{H}$  NMR:  $\delta$  7.81 (d,  $J = 7.5$  Hz, 2H), 7.65 (t,  $J = 7.2$  Hz, 1H), 7.48–7.56 (m, 4H), 7.02 (t,  $J = 8.7$  Hz, 2H), 5.80 (d,  $J = 45.9$  Hz, 1H), 5.71 (brs, 1H), 1.95 (d,  $J = 2.7$  Hz, 3H), 1.41 (s, 9H);  $^{19}\text{F}$  NMR:  $\delta$  -114.4 – -114.3 (m, 1F), -174.7 (d,  $J = 46.0$  Hz, 1F);  $^{13}\text{C}$  NMR:  $\delta$  162.6 (d,  $J = 248.2$  Hz), 137.4, 135.7, 134.4, 129.3, 128.9, 128.4 (dd,  $J = 8.4, 3.0$  Hz), 115.1 (d,  $J = 21.4$  Hz), 105.3 (d,  $J = 237.1$  Hz), 62.2 (d,  $J = 16.7$  Hz), 56.7, 25.6 (d,  $J = 5.1$  Hz), 23.0; IR (KBr): 3286, 2987, 1602, 1510, 1451, 1408, 1329, 1168, 1054, 836, 689, 620, 554  $\text{cm}^{-1}$ ; Anal. Calcd. for  $\text{C}_{19}\text{H}_{23}\text{F}_2\text{NO}_3\text{S}_2$ : C, 54.92; H, 5.58; N, 3.37; Found C, 54.97; H, 5.72; N, 3.22; MS (ESI,  $m/z$ ) 416.0 ( $\text{M}^+ + 1$ ).

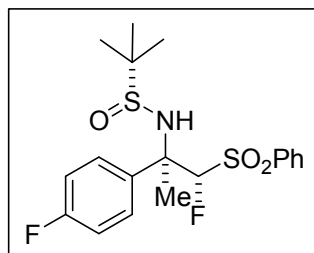

**4b''**

White solid. mp 162–163°C.  $[\alpha]_D^{25} = -82.86$  ( $c = 1.03$ ,  $\text{CHCl}_3$ );  $^1\text{H}$  NMR:  $\delta$  7.94 (d,  $J = 8.1$  Hz, 2H), 7.72 (t,  $J = 7.2$  Hz, 1H), 7.59 (t,  $J = 7.8$  Hz, 2H), 7.43–7.49 (m, 2H), 7.06 (t,  $J = 8.4$  Hz, 2H), 5.33 (brs, 1H), 5.13 (d,  $J = 44.7$  Hz, 1H), 2.14 (s, 3H), 1.29 (s, 9H);  $^{19}\text{F}$  NMR:  $\delta$  -113.3 – -113.2 (m, 1F), -178.7 (d,  $J = 44.3$  Hz, 1F);  $^{13}\text{C}$  NMR:  $\delta$  162.7 (d,  $J = 249.1$  Hz), 137.2, 134.9, 134.7, 129.7 (d,  $J = 8.4$  Hz), 129.5, 129.1, 115.5 (d,  $J = 22.1$  Hz), 104.3 (d,  $J = 229.4$  Hz), 63.1 (d,  $J = 22.0$  Hz), 56.8, 22.9, 22.8; IR (KBr): 3276, 2956, 1739, 1604, 1513, 1450, 1325, 1311, 1148, 1056, 848, 729, 686, 595, 545  $\text{cm}^{-1}$ . Anal. Calcd. for  $\text{C}_{19}\text{H}_{23}\text{F}_2\text{NO}_3\text{S}_2$ : C, 54.92; H, 5.58; N, 3.37; Found C, 54.99; H, 5.54; N, 3.13; MS (ESI,  $m/z$ ) 416.0 ( $\text{M}^+ + 1$ ).

#### Sulfinamide **4c'**+**4c''**:

Using the typical procedure as condition A, the crude product was purified by silica gel column chromatography to afford two diastereoisomers **4c'** (218 mg) and **4c''** (182 mg) respectively, overall yield 86%.

Using the typical procedure as condition B, the crude product was purified by silica gel column chromatography to afford two diastereoisomers **4c'** (46 mg) and **4c''** (94 mg) respectively, overall yield 60%.

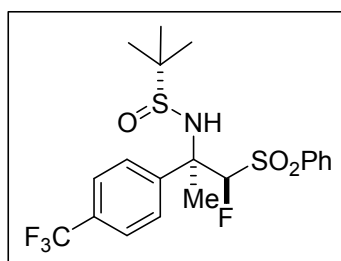

**4c'**

White solid. mp 142–144°C.  $[\alpha]_D^{25} = -53.63$  ( $c = 0.98$ ,  $\text{CHCl}_3$ );  $^1\text{H}$  NMR:  $\delta$  7.78 (d,  $J = 7.2$  Hz, 2H), 7.54–7.70 (m, 5H), 7.49 (t,  $J = 7.5$  Hz, 2H), 5.89 (d,  $J = 45.6$  Hz, 1H), 5.81 (brs, 1H), 1.96 (d,  $J = 3.3$  Hz, 3H), 1.42 (s, 9H);  $^{19}\text{F}$  NMR:  $\delta$  -63.1 (s, 3F), -174.6 (d,  $J = 47.1$  Hz, 1F);  $^{13}\text{C}$  NMR:  $\delta$  144.1, 137.1, 134.6, 130.4 (q,  $J = 31.3$  Hz), 129.3, 128.9, 126.95, 126.91, 125.2 (q,  $J = 4.9$  Hz), 105.3 (d,  $J = 237.3$  Hz), 62.4 (d,  $J = 16.7$  Hz), 56.8, 25.5 (d,  $J = 5.3$  Hz), 23.0; IR (KBr): 3287, 2974, 1622, 1450, 1328, 1164, 1121, 1054, 847, 687, 601, 519  $\text{cm}^{-1}$  □ Anal. Calcd. for  $\text{C}_{20}\text{H}_{23}\text{F}_4\text{NO}_3\text{S}_2$ : C, 51.60; H, 4.98; N, 3.01; Found C, 51.70; H, 5.02; N, 2.83; MS (ESI,  $m/z$ ) 466.0 ( $\text{M}^+ + 1$ ).

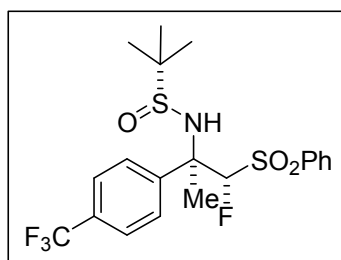

**4c''**

White solid. mp 180–182°C.  $[\alpha]_D^{25} = -71.17$  ( $c = 0.93$ ,  $\text{CHCl}_3$ );  $^1\text{H}$  NMR:  $\delta$  7.93 (d,  $J = 8.1$  Hz, 2H), 7.72 (t,  $J = 7.5$  Hz, 1H), 7.55–7.64 (m, 6H), 5.39 (brs, 1H), 5.16 (d,  $J = 44.7$  Hz, 1H), 2.18 (s, 3H), 1.31 (s, 9H);  $^{19}\text{F}$  NMR:  $\delta$  -63.2 (s, 3F), -178.8 (d,  $J = 44.6$  Hz, 1F);  $^{13}\text{C}$  NMR:  $\delta$  143.1, 136.9, 135.1, 130.8 (d,  $J = 33.5$  Hz), 129.5, 129.2, 128.3, 125.5 (d,  $J = 4.6$  Hz), 122.0, 104.0 (d,  $J = 229.9$  Hz), 63.4 (d,  $J = 22.0$  Hz), 57.1, 22.9, 22.8; IR (KBr): 3292, 2945, 1620, 1417, 1328, 1152, 1134, 1056, 850, 613, 572, 536  $\text{cm}^{-1}$  □ Anal. Calcd. for  $\text{C}_{20}\text{H}_{23}\text{F}_4\text{NO}_3\text{S}_2$ : C, 51.60; H, 4.98; N, 3.01; Found C, 51.44; H, 4.97; N, 2.80; MS (ESI,  $m/z$ ) 466.1 ( $\text{M}^+ + 1$ ).

#### Sulfinamide **4d'**+**4d''**:

Using the typical procedure as condition A, the crude product was purified by silica gel column chromatography to afford two diastereoisomers **4d'** (188mg) and **4d''** (175mg) respectively, overall yield 85%.

Using the typical procedure as condition B, the crude product was purified by silica gel column chromatography to afford two diastereoisomers **4d'** (96 mg) and **4d''** (38 mg), respectively; overall yield 62%.

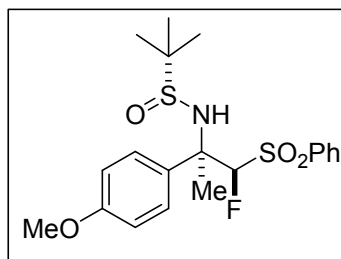

**4d'**

White solid. mp 100 –102°C.  $[\alpha]_D^{25} = -54.44$  ( $c = 1.05$ ,  $\text{CHCl}_3$ );  $^1\text{H}$  NMR:  $\delta$  7.81 (d,  $J = 7.5$  Hz, 2H), 7.63 (t,  $J = 7.5$  Hz, 1H), 7.42–7.53 (m, 4H), 6.85 (d,  $J = 9.0$  Hz, 2H), 5.74 (d,  $J = 45.3$  Hz, 1H), 5.63 (brs, 1H), 3.81 (s, 3H), 1.96 (d,  $J = 2.4$  Hz, 3H), 1.39 (s, 9H);  $^{19}\text{F}$  NMR:  $\delta$  –175.0 (d,  $J = 44.0$  Hz, 1F);  $^{13}\text{C}$  NMR:  $\delta$  159.5, 137.5, 134.3, 131.6, 129.2, 129.0, 127.8 (d,  $J = 2.3$  Hz), 113.6, 105.6 (d,  $J = 235.4$  Hz), 62.2 (d,  $J = 16.4$  Hz), 56.6, 55.2, 25.3 (d,  $J = 3.1$  Hz), 23.1; IR (KBr): 3452, 3286, 2977, 1614, 1516, 1323, 1256, 1186, 1141, 1055, 834, 689, 564, 515  $\text{cm}^{-1}$  □ Anal. Calcd. for  $\text{C}_{20}\text{H}_{26}\text{FNO}_4\text{S}_2$ : C, 56.18; H, 6.13; N, 3.28; Found C, 56.07; H, 6.22; N, 2.97; MS (ESI,  $m/z$ ) 428.1 ( $\text{M}^+ + 1$ ).

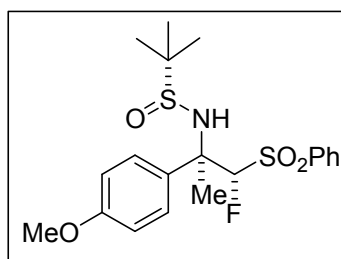

**4d''**

White solid. mp 171 –172°C.  $[\alpha]_D^{26} = -82.73$  ( $c = 0.95$ ,  $\text{CHCl}_3$ );  $^1\text{H}$  NMR:  $\delta$  7.94 (d,  $J = 8.1$  Hz, 2H), 7.71 (t,  $J = 7.2$  Hz, 1H), 7.58 (t,  $J = 7.2$  Hz, 2H), 7.38 (d,  $J = 9.0$  Hz, 2H), 6.88 (d,  $J = 9.0$  Hz, 2H), 5.29 (brs, 1H), 5.13 (d,  $J = 44.7$  Hz, 1H), 3.80 (s, 3H), 2.12 (s, 3H), 1.29 (s, 9H);  $^{19}\text{F}$  NMR:  $\delta$  –178.5 (d,  $J = 43.7$  Hz, 1F);  $^{13}\text{C}$  NMR:  $\delta$  159.7, 137.3, 134.8, 130.7, 129.4, 129.1, 113.9, 104.5 (d,  $J = 228.5$  Hz), 63.1 (d,  $J = 21.7$  Hz), 56.7, 55.3, 22.9, 22.8; IR (KBr): 3295, 2953, 1612, 1517, 1309, 1259, 1151, 1058, 842, 728, 597  $\text{cm}^{-1}$  □ Anal. Calcd. for  $\text{C}_{20}\text{H}_{26}\text{FNO}_4\text{S}_2$ : C, 56.18; H, 6.13; N, 3.28; Found C, 56.16; H, 6.09; N, 3.10; MS (ESI,  $m/z$ ) 428.2 ( $\text{M}^+ + 1$ ).

### Sulfonamide **4e'**+**4e''**:

Using the typical procedure as condition A, the crude product was purified by silica gel column chromatography to afford two diastereoisomers **4e'** (218 mg) and **4e''** (163 mg) respectively, overall yield 93%.

Using the typical procedure as condition B, the crude product was purified by silica gel column chromatography to afford two diastereoisomers **4e'** (85mg) and **4e''** (55mg) respectively, overall yield 68%.

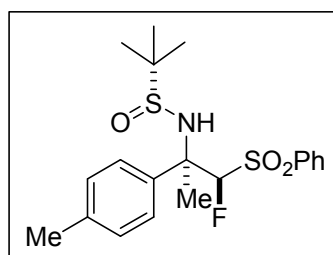

**4e'**

White solid. mp 145 –147 °C.  $[\alpha]_D^{26} = -58.86$  ( $c = 0.91$ , CHCl<sub>3</sub>); <sup>1</sup>H NMR:  $\delta$  7.80 (d,  $J = 7.8$  Hz, 2H), 7.62 (t,  $J = 7.5$  Hz, 1H), 7.48 (t,  $J = 7.8$  Hz, 2H), 7.42 (d,  $J = 7.5$  Hz, 2H), 6.85 (d,  $J = 8.1$  Hz, 2H), 5.77 (d,  $J = 45.3$  Hz, 1H), 5.66 (brs, 1H), 2.34 (s, 3H), 1.96 (d,  $J = 2.7$  Hz, 3H), 1.39 (s, 9H); <sup>19</sup>F NMR:  $\delta$  -175.0 (d,  $J = 47.1$  Hz, 1F); <sup>13</sup>C NMR:  $\delta$  138.1, 137.5, 136.7, 134.2, 129.2, 129.0, 128.9, 126.4 (d,  $J = 3.2$  Hz), 105.6 (d,  $J = 236.9$  Hz), 62.3 (d,  $J = 17.9$  Hz), 56.7, 25.3 (d,  $J = 4.9$  Hz), 23.1, 21.1; IR (KBr): 3456, 3291, 2978, 1517, 1450, 1324, 1163, 1140, 1056, 818, 688, 532 cm<sup>-1</sup> □ Anal. Calcd. for C<sub>20</sub>H<sub>26</sub>FN<sub>3</sub>O<sub>3</sub>S<sub>2</sub>: C, 58.37; H, 6.37; N, 3.40; Found C, 58.40; H, 6.57; N, 3.20; MS (ESI,  $m/z$ ) 412.1 ( $M^+ + 1$ ).

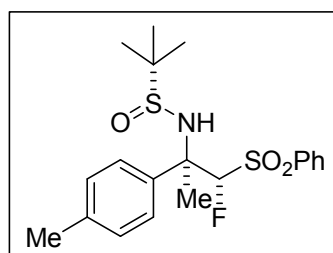

**4e''**

White solid. mp 175 –176 °C.  $[\alpha]_D^{26} = -82.79$  ( $c = 0.99$ , CHCl<sub>3</sub>); <sup>1</sup>H NMR:  $\delta$  7.93 (d,  $J = 8.1$  Hz, 2H), 7.70 (t,  $J = 7.2$  Hz, 1H), 7.57 (t,  $J = 7.5$  Hz, 2H), 7.36 (d,  $J = 8.1$  Hz, 2H), 6.88 (d,  $J = 8.4$  Hz, 2H), 5.32 (brs, 1H), 5.16 (d,  $J = 44.7$  Hz, 1H), 2.34 (s, 3H), 2.12 (s, 3H), 1.29 (s, 9H); <sup>19</sup>F NMR:  $\delta$



–178.5 (d,  $J = 46.3$  Hz, 1F);  $^{13}\text{C}$  NMR:  $\delta$  138.7, 137.3, 135.9 (d,  $J = 2.6$  Hz), 134.8, 129.4, 129.3, 129.1, 127.7, 104.5 (d,  $J = 228.7$  Hz), 63.3 (d,  $J = 22.3$  Hz), 56.8, 22.9, 22.8, 21.1; IR (KBr): 3290, 2945, 1449, 1310, 1150, 1056, 827, 729, 595  $\text{cm}^{-1}$  □ Anal. Calcd. for  $\text{C}_{20}\text{H}_{26}\text{FNO}_3\text{S}_2$ : C, 58.37; H, 6.37; N, 3.40; Found C, 58.47; H, 6.36; N, 3.19; MS (ESI,  $m/z$ ) 412.1 ( $\text{M}^+ + 1$ ).

#### Sulfinamide **4f'**+**4f''**:

Using the typical procedure as condition A, the crude product was purified by silica gel column chromatography to afford two diastereoisomers **4f'** (180 mg) and **4f''** (152 mg), respectively; overall yield 77%.

Using the typical procedure as condition B, the crude product was purified by silica gel column chromatography to afford two diastereoisomers **4f'** (58 mg) and **4f''** (90 mg), respectively; overall yield 69%.

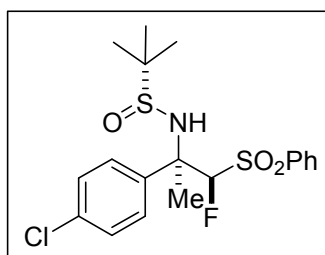

**4f'**

White solid. mp 163 –164 °C.  $[\alpha]_{\text{D}}^{23} = -41.14$  (c = 1.02,  $\text{CHCl}_3$ );  $^1\text{H}$  NMR:  $\delta$  7.80 (d,  $J = 7.8$  Hz, 2H), 7.65 (t,  $J = 7.5$  Hz, 1H), 7.46–7.55 (m, 4H), 7.26–7.31 (m, 2H), 5.82 (d,  $J = 45.3$  Hz, 1H), 5.72 (brs, 1H), 1.94 (d,  $J = 2.4$  Hz, 3H), 1.41 (s, 9H);  $^{19}\text{F}$  NMR:  $\delta$  –174.6 (d,  $J = 45.5$  Hz, 1F);  $^{13}\text{C}$  NMR:  $\delta$  138.5, 137.2, 134.4, 134.3, 129.3, 128.9, 128.4, 127.97, 127.91, 105.3 (d,  $J = 236.5$  Hz), 62.2 (d,  $J = 17.9$  Hz), 56.7, 25.4 (d,  $J = 4.8$  Hz), 23.1; IR (KBr): 3285, 2985, 1496, 1451, 1404, 1326, 1164, 1054, 1014, 830, 687, 616, 528  $\text{cm}^{-1}$  □ Anal. Calcd. for  $\text{C}_{19}\text{H}_{23}\text{ClFNO}_3\text{S}_2$ : C, 52.83; H, 5.37; N, 3.24; Found C, 52.83; H, 5.42; N, 3.08; MS (ESI,  $m/z$ ) 432.1 ( $\text{M}^+ + 1$ ).

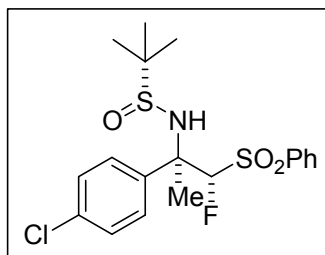

**4f''**

White solid. mp 167–168 °C.  $[\alpha]_D^{24} = -79.14$  ( $c = 1.01$ , CHCl<sub>3</sub>); <sup>1</sup>H NMR:  $\delta$  7.94 (d,  $J = 7.8$  Hz, 2H), 7.74 (t,  $J = 7.2$  Hz, 1H), 7.59 (t,  $J = 8.1$  Hz, 2H), 7.42 (d,  $J = 9.0$  Hz, 2H), 7.34 (d,  $J = 9.0$  Hz, 2H), 5.33 (brs, 1H), 5.12 (d,  $J = 44.7$  Hz, 1H), 2.13 (s, 3H), 1.29 (s, 9H); <sup>19</sup>F NMR:  $\delta$  -178.3 (d,  $J = 46.0$  Hz, 1F); <sup>13</sup>C NMR:  $\delta$  137.5, 137.1, 134.9, 134.8, 129.5, 129.2, 129.1, 128.8, 104.1 (d,  $J = 229.3$  Hz), 63.2 (d,  $J = 22.3$  Hz), 56.9, 22.9, 22.8; IR (KBr): 3310, 3276, 2939, 1498, 1449, 1328, 1151, 1057, 1013, 840, 722, 580, 536 cm<sup>-1</sup>. Anal. Calcd. for C<sub>19</sub>H<sub>23</sub>ClFNO<sub>3</sub>S<sub>2</sub>: C, 52.83; H, 5.37; N, 3.24; Found C, 52.80; H, 5.42; N, 3.13; MS (ESI,  $m/z$ ) 432.1 (M<sup>+</sup>+1).

#### Sulfonamide 4g'+4g'':

Using the typical procedure as condition A, the crude product was purified by silica gel column chromatography to afford two diastereoisomers **4g'** (170 mg) and **4g''** (148 mg) respectively, overall yield 72%.

Using the typical procedure as condition B, the crude product was purified by silica gel column chromatography to afford two diastereoisomers **4g'** (51 mg) and **4g''** (101 mg) respectively, overall yield 68%.

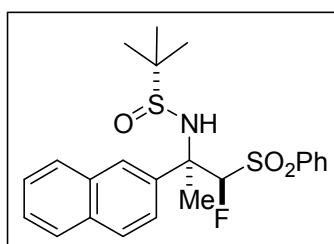

**4g'**

White solid. mp 156–157 °C.  $[\alpha]_D^{26} = -34.82$  ( $c = 0.99$ , CHCl<sub>3</sub>); <sup>1</sup>H NMR:  $\delta$  7.98 (s, 1H), 7.71–7.84 (m, 5H), 7.45–7.64 (m, 4H), 7.36 (t,  $J = 7.5$  Hz, 2H), 5.87 (d,  $J = 45.6$  Hz, 1H), 5.78 (brs, 1H), 2.07 (d,  $J = 2.7$  Hz, 3H), 1.45 (s, 9H); <sup>19</sup>F NMR:  $\delta$  -174.7 (d,  $J = 44.6$  Hz, 1F); <sup>13</sup>C NMR:  $\delta$

137.2, 137.1, 134.3, 133.0, 132.8, 129.1, 129.0, 128.6, 127.8, 127.5, 126.6, 126.3, 125.9, 124.5, 105.8 (d,  $J = 237.1$  Hz), 62.7 (d,  $J = 16.6$  Hz), 56.8, 25.4 (d,  $J = 2.6$  Hz), 23.1; IR (KBr): 3291, 3063, 1448, 1330, 1161, 1069, 754, 687, 595, 534  $\text{cm}^{-1}$  □ Anal. Calcd. for  $\text{C}_{23}\text{H}_{26}\text{FNO}_3\text{S}_2$ : C, 61.72; H, 5.86; N, 3.13; Found C, 61.69; H, 6.05; N, 2.96; MS (ESI,  $m/z$ ) 448.1 ( $\text{M}^+ + 1$ ).

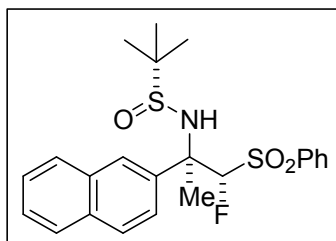

**4g''**

White solid. mp 170 –171 °C.  $[\alpha]_{\text{D}}^{26} = -116.64$  ( $c = 1.09$ ,  $\text{CHCl}_3$ );  $^1\text{H}$  NMR:  $\delta$  7.93–7.97 (m, 3H), 7.79–7.86 (m, 3H), 7.69 (t,  $J = 7.8$  Hz, 1H), 7.49–7.60 (m, 5H), 5.41 (brs, 1H), 5.30 (d,  $J = 45.0$  Hz, 1H), 2.28 (s, 3H), 1.30 (s, 9H);  $^{19}\text{F}$  NMR:  $\delta$  –178.2 (d,  $J = 44.3$  Hz, 1F);  $^{13}\text{C}$  NMR:  $\delta$  137.2 □ 136.0 □ 134.9 □ 133.0 □ 132.9 □ 129.5 □ 129.1 □ 128.6 □ 128.4 □ 128.2 □ 127.5 □ 127.1 □ 126.6 □ 124.5 □ 104.1 (d,  $J = 230.9$  Hz), 63.7 (d,  $J = 22.5$  Hz), 56.9, 22.9, 22.8; IR (KBr): 3293, 2942, 1450, 1320, 1189, 1150, 1056, 823, 755, 684, 593, 543  $\text{cm}^{-1}$  □ Anal. Calcd. for  $\text{C}_{23}\text{H}_{26}\text{FNO}_3\text{S}_2$ : C, 61.72; H, 5.86; N, 3.13; Found C, 61.80; H, 5.96; N, 2.97; MS (ESI,  $m/z$ ) 448.1 ( $\text{M}^+ + 1$ ).

#### Sulfonamide **4h'**+**4h''**:

Using the typical procedure as condition A, the crude product was purified by silica gel column chromatography to afford a mixture of two diastereoisomers **4h'** and **4h''** in the ratio 1:1 (determined by  $^{19}\text{F}$  NMR of the crude reaction mixture), overall yield 81%.

Using the typical procedure as condition B, the crude product was purified by silica gel column chromatography to afford a mixture of two diastereoisomers **4h'** and **4h''** in the ratio 4:1 (determined by  $^{19}\text{F}$  NMR of the crude reaction mixture), overall yield 77%.

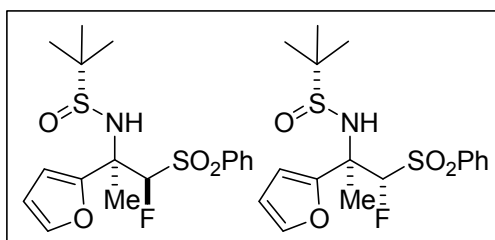

#### 4h' + 4h''

$^1\text{H}$  NMR:  $\delta$  7.88–7.97 (m, 2H), 7.52–7.76 (m, 3H), 7.43–7.46 (m, 0.4H), 7.39–7.41 (m, 0.6H), 6.55 (d,  $J$  = 3.6 Hz, 0.6H), 6.47 (d,  $J$  = 3.6 Hz, 0.4H), 6.40–6.43 (m, 0.4H), 6.36–6.39 (m, 0.6H), 5.62 (d,  $J$  = 45.6 Hz, 0.4H), 5.43 (d,  $J$  = 44.7 Hz, 0.6H), 5.15 (brs, 0.4H), 5.01 (brs, 0.6H), 2.06 (s, 1.8H), 1.98 (d,  $J$  = 2.4 Hz, 1.2H), 1.29 (s, 3.6H), 1.26 (s, 5.4H);  $^{19}\text{F}$  NMR:  $\delta$  -178.2 (d,  $J$  = 45.7 Hz, 0.6F)  $\square$  -179.3 (d,  $J$  = 45.1 Hz, 0.4F); IR (KBr): 3295, 2959, 1585, 1449, 1327, 1162, 1063, 1021, 726, 574, 537  $\text{cm}^{-1}$ ; MS (ESI,  $m/z$ ) 388.0 ( $\text{M}^+$ +1); HRMS analysis (MALDI)  $m/z$ : Calcd. For  $\text{C}_{17}\text{H}_{22}\text{NO}_4\text{FS}_2\text{Na}$  ( $\text{M}^+$ +Na): 410.0857; Found 410.0866.

#### Sulfonamide 4i'+4i'':

Using the typical procedure as condition A, the crude product was purified by silica gel column chromatography to afford a mixture of two diastereoisomers **4i'** and **4i''** in the ratio 1.3:1 (determined by  $^{19}\text{F}$  NMR of the crude reaction mixture), overall yield 81%.

Using the typical procedure as condition B, the crude product was purified by silica gel column chromatography to afford a mixture of two diastereoisomers **4i'** and **4i''** in the ratio 1.2:1 (determined by  $^{19}\text{F}$  NMR of the crude reaction mixture), overall yield 74%.

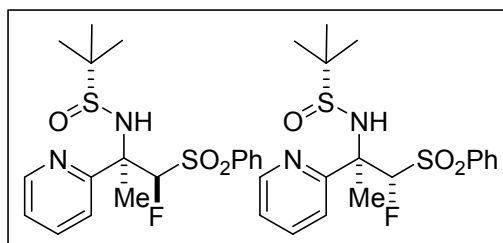

#### 4i' + 4i''

$^1\text{H}$  NMR:  $\delta$  8.62 (d,  $J$  = 4.8 Hz, 0.56H), 8.58 (d,  $J$  = 4.5 Hz, 0.44H), 7.47–7.92 (m, 7H), 7.24–7.34 (m, 1H), 5.88 (d,  $J$  = 45.0 Hz, 0.44H), 5.81 (d,  $J$  = 45.9 Hz, 0.56H), 5.64 (brs, 0.44H), 5.62 (brs, 0.56H), 2.11 (d,  $J$  = 1.2 Hz, 1.32H), 1.98 (d,  $J$  = 2.1 Hz, 1.68H), 1.30 (s, 3.96H), 1.26 (s, 5.04H);  $^{19}\text{F}$  NMR:  $\delta$  -179.0 (d,  $J$  = 44.6 Hz, 0.56F)  $\square$  -180.8 (d,  $J$  = 45.1 Hz, 0.44F); IR (KBr): 3469, 3290, 2960, 1589, 1469, 1449, 1330, 1155, 1067, 751, 720, 688, 564, 537  $\text{cm}^{-1}$ ; MS (ESI,  $m/z$ ) 399.1 ( $\text{M}^+$ +1); HRMS analysis (MALDI)  $m/z$ : Calcd. For  $\text{C}_{18}\text{H}_{23}\text{N}_2\text{O}_3\text{FS}_2\text{Na}$  ( $\text{M}^+$ +Na): 421.1024; Found 421.1026.

### Sulfinamide **4j'**+**4j''**:

Using the typical procedure as condition A, the crude product was purified by silica gel column chromatography to afford only a diastereoisomer **4j''** (the other diastereoisomer **4j'** was mixed with unreacted fluoromethyl phenyl sulfone **1**, the ratio of **4j'** and **4j''** 1:1.6 ), overall yield (determined by  $^{19}\text{F}$  NMR of the crude reaction mixture) 81%.

Using the typical procedure as condition B, the crude product was purified by silica gel column chromatography to afford only a diastereoisomer **4j''** (the other diastereoisomer **4j'** was mixed with unreacted fluoromethyl phenyl sulfone **1**, the ratio of **4j'** and **4j''** is 1:1.6), overall yield 73% (determined by  $^{19}\text{F}$  NMR of the crude reaction mixture).

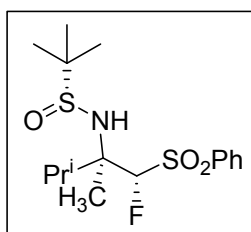

**4j''**

White solid. mp 125 –126°C.  $[\alpha]_{\text{D}}^{24} = -89.71$  ( $c = 0.90$ ,  $\text{CHCl}_3$ );  $^1\text{H}$  NMR:  $\delta$  7.97 (d,  $J = 7.5$  Hz, 2H), 7.69 (t,  $J = 7.2$  Hz, 1H), 7.58 (t,  $J = 7.5$  Hz, 2H), 5.19 (d,  $J = 45.6$  Hz, 1H), 4.47 (brs, 1H), 2.52-2.62 (m, 1H), 1.64 (s, 3H), 1.26 (s, 9H), 1.11 (dd,  $J = 6.9, 2.4$  Hz, 3H), 1.04 (d,  $J = 6.0$  Hz, 3H);  $^{19}\text{F}$  NMR:  $\delta$  -175.7 (d,  $J = 43.7$  Hz, 1F);  $^{13}\text{C}$  NMR:  $\delta$  137.3, 134.6, 129.3, 105.4 (d,  $J = 226.9$  Hz), 63.0 (d,  $J = 16.4$  Hz), 56.5, 34.8, 22.8, 20.4 (d,  $J = 3.8$  Hz), 17.9, 17.7 (d,  $J = 5.7$  Hz); IR (KBr): 3307, 2946, 1451, 1319, 1273, 1150, 1073, 897, 838, 687, 593, 557  $\text{cm}^{-1}$  □ Anal. Calcd. for  $\text{C}_{16}\text{H}_{26}\text{FNO}_3\text{S}_2$ : C, 52.87; H, 7.21; N, 3.85; Found C, 52.88; H, 7.28; N, 3.68; MS (ESI,  $m/z$ ) 364.1 ( $\text{M}^+ + 1$ ).

### Sulfinamide **4k'**+**4k''**:

Using the typical procedure as condition A, the crude product was purified by silica gel column chromatography to afford only a diastereoisomer **4k''** (the other diastereoisomer **4k'** was mixed with unreacted fluoromethyl phenyl sulfone **1**, the ratio of **4k'** and **4k''** 1:1.8), overall yield 77% (determined by  $^{19}\text{F}$  NMR of the crude reaction mixture).

Using the typical procedure as condition B, the crude product was purified by silica gel column chromatography to afford only a diastereoisomer **4k''** (the other diastereoisomer **4k'** was mixed with unreacted fluoromethyl phenyl sulfone **1**, the ratio of **4k'** and **4k''** is 1:2.9), overall yield 47% (determined by  $^{19}\text{F}$  NMR of the crude reaction mixture).

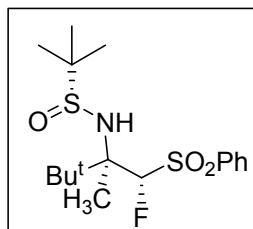

**4k''**

White solid. mp 142 –143 °C.  $[\alpha]_D^{24} = -117.72$  ( $c = 1.03$ ,  $\text{CHCl}_3$ );  $^1\text{H}$  NMR:  $\delta$  8.00 (d,  $J = 7.5$  Hz, 2H), 7.68 (t,  $J = 7.8$  Hz, 1H), 7.57 (t,  $J = 7.5$  Hz, 2H), 5.26 (d,  $J = 43.8$  Hz, 1H), 4.76 (brs, 1H), 1.65 (d,  $J = 2.7$  Hz, 3H), 1.28 (s, 9H), 1.16 (s, 9H);  $^{19}\text{F}$  NMR:  $\delta$  -173.4 (d,  $J = 57.9$  Hz, 1F);  $^{13}\text{C}$  NMR:  $\delta$  137.8, 134.5, 129.4, 129.3, 104.9 (d,  $J = 225.7$  Hz), 67.3 (d,  $J = 16.6$  Hz), 56.8, 39.2, 26.5, 23.0, 17.5 (d,  $J = 6.9$  Hz); IR (KBr): 3317, 2955, 1585, 1450, 1324, 1273, 1162, 1084, 1071, 903, 688, 589  $\text{cm}^{-1}$ ; Anal. Calcd. for  $\text{C}_{17}\text{H}_{28}\text{FNO}_3\text{S}_2$ : C, 54.08; H, 7.48; N, 3.71; Found C, 54.07; H, 7.54; N, 3.51; MS (ESI,  $m/z$ ) 378.1 ( $\text{M}^+ + 1$ ).

#### Sulfonamide **4l'**+**4l''**:

Using the typical procedure as condition A, the crude product was purified by silica gel column chromatography to afford two diastereoisomers **4l'** (127 mg) and **4l''** (263 mg), respectively; overall yield 88%.

Using the typical procedure as condition B, the crude product was purified by silica gel column chromatography to afford two diastereoisomers **4l'** (42 mg) and **4l''** (154 mg), respectively; overall yield 67%.

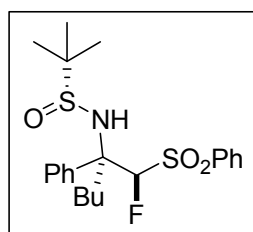

**4l'**

White solid. mp 170–172°C.  $[\alpha]_D^{24} = -60.81$  ( $c = 1.05$ ,  $\text{CHCl}_3$ );  $^1\text{H}$  NMR:  $\delta$  7.87 (d,  $J = 7.5$  Hz, 2H), 7.64 (t,  $J = 7.2$  Hz, 1H), 7.36–7.56 (m, 7H), 5.45 (d,  $J = 45.9$  Hz, 1H), 5.44 (brs, 1H), 2.55–2.67 (m, 1H), 2.17–2.29 (m, 1H), 1.38 (s, 9H), 1.19–1.32 (m, 3H), 0.87–1.02 (m, 1H), 0.81 (t,  $J = 6.6$  Hz, 3H);  $^{19}\text{F}$  NMR:  $\delta$  -172.2 (d,  $J = 47.1$  Hz, 1F);  $^{13}\text{C}$  NMR:  $\delta$  137.0, 136.8, 134.5, 129.5, 129.2, 128.6, 128.4, 126.9, 104.5 (d,  $J = 236.0$  Hz), 65.9 (d,  $J = 19.8$  Hz), 57.3, 35.5, 24.8, 23.2, 22.6, 13.8; IR (KBr): 3298, 2958, 1467, 1448, 1324, 1256, 1158, 1071, 779, 687, 572, 541  $\text{cm}^{-1}$ ; Anal. Calcd. for  $\text{C}_{22}\text{H}_{30}\text{FNO}_3\text{S}_2$ : C, 60.11; H, 6.88; N, 3.19; Found C, 60.28; H, 6.85; N, 3.10; MS (ESI,  $m/z$ ) 440.1 ( $\text{M}^+ + 1$ ).

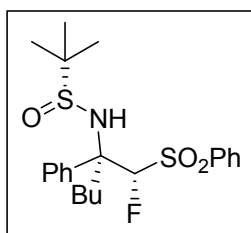

**41''**

White solid. mp 162–164°C.  $[\alpha]_D^{24} = -50.56$  ( $c = 0.99$ ,  $\text{CHCl}_3$ );  $^1\text{H}$  NMR:  $\delta$  7.79 (d,  $J = 7.5$  Hz, 2H), 7.60 (t,  $J = 7.5$  Hz, 1H), 7.43–7.51 (m, 4H), 7.30–7.38 (m, 3H), 6.07 (d,  $J = 45.6$  Hz, 1H), 5.81 (brs, 1H), 2.29–2.39 (m, 2H), 1.45 (s, 9H), 1.12–1.30 (m, 3H), 0.77 (t,  $J = 6.9$  Hz, 3H), 0.58–0.72 (m, 1H);  $^{19}\text{F}$  NMR:  $\delta$  -175.8 (d,  $J = 46.9$  Hz, 1F);  $^{13}\text{C}$  NMR:  $\delta$  137.8, 134.1, 129.2, 128.9, 128.2, 128.1, 126.53, 126.50, 105.3 (d,  $J = 235.6$  Hz), 64.9 (d,  $J = 18.6$  Hz), 57.0, 34.2 (d,  $J = 1.9$  Hz), 23.8, 23.1, 22.4, 13.9; IR (KBr): 3287, 2870, 1447, 1332, 1164, 1055, 871, 757, 702, 577, 527  $\text{cm}^{-1}$ ; Anal. Calcd. for  $\text{C}_{22}\text{H}_{30}\text{FNO}_3\text{S}_2$ : C, 60.11; H, 6.88; N, 3.19; Found C, 60.00; H, 6.81; N, 3.10; MS (ESI,  $m/z$ ) 440.1 ( $\text{M}^+ + 1$ ).

#### Addition of Lithiated Methyl Sulfones to **2a**:

Under  $\text{N}_2$  atmosphere, *n*-Butyllithium in hexane (1.3 mmol) was added dropwise into the THF (8 mL) solution of methyl phenyl sulfone (188 mg, 1.2 mmol) at -78 °C, and after 30 min at that temperature, *N*-*tert*-butanesulfinyl ketimine **2a** (224mg, 1.0 mmol) in 2 mL of THF was added slowly into the solution. The reaction mixture was then stirred vigorously at -78 °C for 3.5 h ,

followed by adding a saturated NaCl water solution (10 mL) at this temperature. The solution mixture was extracted with Et<sub>2</sub>O (10 mL×3), and the combined organic phase was dried over MgSO<sub>4</sub>. After the removal of volatile solvents under vacuum, the crude product was further purified by silica gel column chromatography to give product **7** in 58% yield (222 mg).

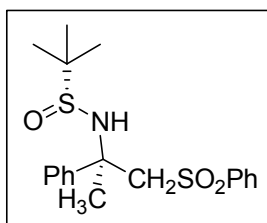

**7**

White solid. mp 104–105°C.  $[\alpha]_D^{23} = -61.83$  ( $c = 0.95$ , CHCl<sub>3</sub>); <sup>1</sup>H NMR:  $\delta$  7.79 (d,  $J = 7.2$  Hz, 2H), 7.58 (t,  $J = 7.2$  Hz, 1H), 7.38–7.50 (m, 4H), 7.24–7.32 (m, 3H), 5.92 (s, 1H), 3.89 (d,  $J = 14.7$  Hz, 1H), 3.78 (d,  $J = 14.7$  Hz, 1H), 1.91 (s, 3H), 1.37 (s, 9H); <sup>13</sup>C NMR:  $\delta$  142.8, 140.9, 133.6, 129.2, 128.4, 127.8, 127.6, 126.0, 66.9, 60.2, 56.4, 28.7, 23.1; IR (KBr): 3284, 2971, 2497, 1495, 1448, 1309, 1147, 1057, 773, 680, 611 cm<sup>-1</sup>. Anal. Calcd. for C<sub>19</sub>H<sub>25</sub>NO<sub>3</sub>S<sub>2</sub>: C, 60.13; H, 6.64; N, 3.69; Found C, 60.00; H, 6.55; N, 3.43; MS (ESI,  $m/z$ ) 380.2 ( $M^+ + 1$ ).

**Procedure for magnesium-mediated reductive desulfonylation and deprotection of the *tert*-butylsulfinyl group and benzylation of **4a**:**

Into a 50-mL Schlenk flask containing **4a** (210 mg, 0.52 mmol) in 5 mL DMF at room temperature was added 3 mL of HOAc/NaOAc (1:1) buffer solution (8 mol/L). Magnesium turnings (183 mg, 7.5 mmol) were added in portions. The reaction mixture was stirred at room temperature for 8 h followed by adding 10 mL of water. The solution mixture was extracted with Et<sub>2</sub>O (20 mL x 3), and the combined organic phase was washed with saturated NaHCO<sub>3</sub> solution and brine, then dried over MgSO<sub>4</sub> and the solvent was removed to give the intermediate product without further purification.

The intermediate product was dissolved in 5 mL of anhydrous methanol. Then 0.5 mL of HCl/Dioxane (4N) was added. The reaction mixture was stirred at room temperature for 30 min and was then concentrated to near dryness. Diethyl ether was added to precipitate out the amine hydrochloride.

Under N<sub>2</sub> atmosphere, a flask containing the amine hydrochloride without further purification



PhCOCl (1.5 mmol), Et<sub>3</sub>N (1.5 mmol) and K<sub>2</sub>CO<sub>3</sub> (0.5 mmol) in 5 mL of dioxane was stirred at 60 °C for 5 h. Then removal of the solvents under reduced pressure and flash chromatography afforded **10** (96 mg) as a white solid in total 72% yield.

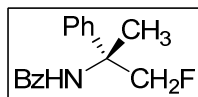

**10**

HPLC: CHIRALPAK OD hexane/2-propanol= 95:5; 0.7mL/min; UV 214 nm; (R)-, *r*<sub>t</sub>= 23.9 min, (S)-, *r*<sub>t</sub>= 28.0 min (98.7% ee);

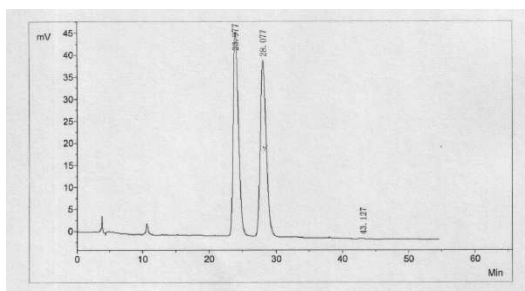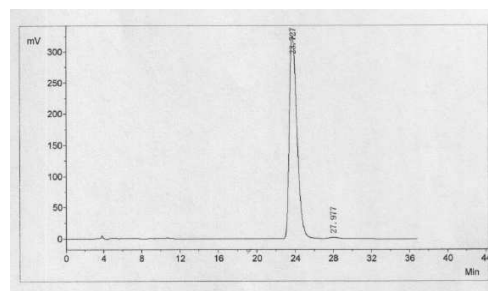

White solid. mp 141–142°C. [ $\alpha$ ]<sub>D</sub><sup>23</sup> = 21.08 (*c* = 0.97, CHCl<sub>3</sub>); <sup>1</sup>H NMR:  $\delta$  7.80 (d, *J* = 7.5 Hz, 2H), 7.25–7.55 (m, 8H), 6.61 (brs, 1H), 4.84 (dd, *J* = 25.2, 9.0 Hz, 1H), 4.69 (dd, *J* = 24.6, 9.0 Hz, 1H), 1.90 (d, *J* = 2.1 Hz, 3H); <sup>19</sup>F NMR:  $\delta$  –221.9 (t, *J* = 48.0 Hz, 1F); <sup>13</sup>C NMR:  $\delta$  166.9, 141.4, 134.9, 131.7, 128.7, 128.6, 127.7, 127.0, 125.5, 87.6 (d, *J* = 179.9 Hz), 59.3, 22.6 (d, *J* = 4.0 Hz); IR (KBr): 3255, 3062, 1638, 1540, 1494, 1317, 1035, 1022, 699, 607 cm<sup>–1</sup>; Anal. Calcd. for C<sub>16</sub>H<sub>16</sub>FNO: C, 74.69; H, 6.27; N, 5.44; Found C, 74.58; H, 6.12; N, 5.24; MS (ESI, *m/z*) 258.4 (*M*<sup>+</sup>+1).

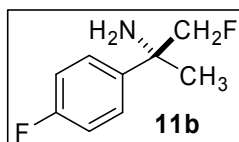

<sup>1</sup>H NMR:  $\delta$  7.49 (dd, *J* = 9.0, 5.1 Hz, 2H), 7.04 (t, *J* = 8.7 Hz, 2H), 4.36 (d, *J* = 48.0 Hz, 2H), 1.67 (s, 2H), 1.50 (d, *J* = 1.8 Hz, 3H); <sup>19</sup>F NMR:  $\delta$  –116.0 to –116.2 (m, 1F), –220.1 (t, *J* = 52.7 Hz, 1F); <sup>13</sup>C NMR:  $\delta$  136.1, 127.4 (d, *J* = 1.6 Hz), 127.3, 115.1 (d, *J* = 20.9 Hz), 91.0 (d, *J* = 177.3 Hz), 55.1, 26.6 (d, *J* = 3.6 Hz); IR (KBr): 2929, 1602, 1512, 1233, 1165, 1012, 836, 572 cm<sup>–1</sup>; MS (EI,

$m/z$ , %) 42 (39.14), 138 (M-CH<sub>2</sub>F, 100.00); HRMS analysis (EI)  $m/z$ : Calcd. For C<sub>9</sub>H<sub>11</sub>NF<sub>2</sub> (M<sup>+</sup>): 171.0860; Found 171.0855.

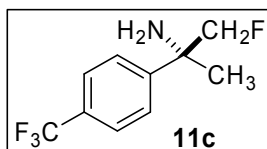

<sup>1</sup>H NMR:  $\delta$  7.66 (d,  $J$  = 8.4 Hz, 2H), 7.62 (d,  $J$  = 9.0 Hz, 2H), 4.49 (dd,  $J$  = 15.3, 9.0 Hz, 1H), 4.33 (dd,  $J$  = 15.0, 9.0 Hz, 1H), 1.67 (s, 2H), 1.51 (d,  $J$  = 2.4 Hz, 3H); <sup>19</sup>F NMR:  $\delta$  - 62.6 (s, 3F), - 220.7 (t,  $J$  = 42.0 Hz, 1F); <sup>13</sup>C NMR:  $\delta$  148.6, 129.3 (q,  $J$  = 95.8 Hz), 126.1, 125.3 (q,  $J$  = 3.8 Hz), 90.7 (d,  $J$  = 178.4 Hz), 55.4 (d,  $J$  = 17.6 Hz), 26.5 (d,  $J$  = 2.6 Hz); IR (KBr): 3379, 2979, 1620, 1412, 1330, 1168, 1118, 1016, 842, 617 cm<sup>-1</sup>; MS (EI,  $m/z$ , %) 42 (30.94), 188 (M-CH<sub>2</sub>F, 100.00); HRMS analysis (EI)  $m/z$ : Calcd. For C<sub>10</sub>H<sub>11</sub>NF<sub>4</sub> (M<sup>+</sup>): 221.0828; Found 221.0828.

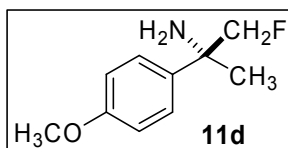

<sup>1</sup>H NMR:  $\delta$  7.43 (d,  $J$  = 9.3 Hz, 2H), 7.11 (d,  $J$  = 8.7 Hz, 2H), 4.34 (d,  $J$  = 47.7 Hz, 2H), 3.80 (s, 3H), 1.70 (s, 2H), 1.50 (d,  $J$  = 1.8 Hz, 3H); <sup>19</sup>F NMR:  $\delta$  - 219.9 (t,  $J$  = 45.4 Hz, 1F); <sup>13</sup>C NMR:  $\delta$  158.6, 136.4 (d,  $J$  = 4.3 Hz), 126.7, 113.7, 91.2 (d,  $J$  = 177.0 Hz), 55.2, 54.9 (d,  $J$  = 17.8 Hz), 26.5 (d,  $J$  = 4.2 Hz); IR (KBr): 2970, 1611, 1514, 1251, 1182, 1034, 831, 410 cm<sup>-1</sup>; MS (EI,  $m/z$ , %) 42 (18.09), 150 (M-CH<sub>2</sub>F, 100.00); HRMS analysis (EI)  $m/z$ : Calcd. For C<sub>10</sub>H<sub>14</sub>NOF (M<sup>+</sup>): 183.1059; Found 183.1060.

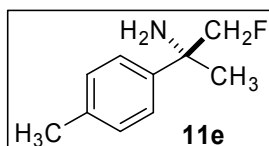

<sup>1</sup>H NMR:  $\delta$  7.32 (d,  $J$  = 8.4 Hz, 2H), 7.11 (d,  $J$  = 8.4 Hz, 2H), 4.30 (d,  $J$  = 48.0 Hz, 2H), 2.27 (s, 2H), 1.61 (s, 3H), 1.43 (d,  $J$  = 1.5 Hz, 3H); <sup>19</sup>F NMR:  $\delta$  - 220.5 (t,  $J$  = 52.2 Hz, 1F); <sup>13</sup>C NMR:  $\delta$  141.4, 136.8, 129.1, 125.4, 91.2 (d,  $J$  = 177.2 Hz), 55.1 (d,  $J$  = 17.8 Hz), 26.5 (d,  $J$  = 3.7 Hz), 20.9; IR (KBr): 3378, 2972, 1514, 1010, 817, 424, 404 cm<sup>-1</sup>; MS (EI,  $m/z$ , %) 42 (27.99), 134 (M-CH<sub>2</sub>F,

100.00); HRMS analysis (EI)  $m/z$ : Calcd. For  $C_{10}H_{14}NF$  ( $M^+$ ): 167.1110; Found 167.1104.

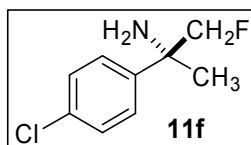

$^1H$  NMR:  $\delta$  7.46 (d,  $J$  = 8.4 Hz, 2H), 7.33 (d,  $J$  = 9.0 Hz, 2H), 4.44 (dd,  $J$  = 10.8, 8.4 Hz, 1H), 4.28 (dd,  $J$  = 11.1, 9.3 Hz, 1H), 1.78 (s, 2H), 1.49 (d,  $J$  = 1.8 Hz, 3H);  $^{19}F$  NMR:  $\delta$  - 220.2 (t,  $J$  = 51.3 Hz, 1F);  $^{13}C$  NMR:  $\delta$  142.9, 133.0, 128.5, 127.1, 90.8 (d,  $J$  = 178.4 Hz), 55.1 (d,  $J$  = 18.4 Hz), 26.5 (d,  $J$  = 3.8 Hz); IR (KBr): 2975, 1594, 1494, 1096, 1013, 829, 579, 410  $cm^{-1}$ ; MS (EI,  $m/z$ , %) 42 (39.00), 154 ( $M-CH_2F$ , 100.00), 156 (32.20); HRMS analysis (EI)  $m/z$ : Calcd. For  $C_9H_{11}NFCI$  ( $M^+$ ): 187.0564; Found 187.0561.

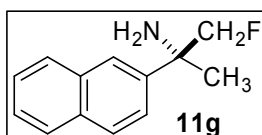

$^1H$  NMR:  $\delta$  7.96 – 7.99 (m, 1H), 7.79 – 7.88 (m, 3H), 7.62 (dd,  $J$  = 8.7, 1.8 Hz, 1H), 7.44 – 7.52 (m, 2H), 4.49 (d,  $J$  = 47.4 Hz, 2H), 1.84 (s, 2H), 1.60 (d,  $J$  = 2.1 Hz, 3H);  $^{19}F$  NMR:  $\delta$  - 220.6 (t,  $J$  = 52.7 Hz, 1F);  $^{13}C$  NMR:  $\delta$  133.2, 132.4, 128.2, 128.1, 127.4, 126.2, 126.0, 124.3, 123.9, 91.0 (d,  $J$  = 177.5 Hz), 55.5 (d,  $J$  = 17.9 Hz), 26.5 (d,  $J$  = 3.6 Hz); IR (KBr): 3059, 2971, 1601, 1506, 1276, 1011, 819, 749, 479, 405  $cm^{-1}$ ; MS (EI,  $m/z$ , %) 129 (26.43), 170 ( $M-CH_2F$ , 100.00); HRMS analysis (EI)  $m/z$ : Calcd. For  $C_{13}H_{14}NF$  ( $M^+$ ): 203.1110; Found 203.1114.

## References:

1. Liu, G.; Cogan, D.A.; Owens, T.D.; Tang, T.P.; Ellman, J.A. *J. Org. Chem.* **1999**, *64*, 1278.
2. *Encyclopedia of Reagents for Organic Synthesis*, Vol. 4, pp 2558-2561, Paquette, L. A., et.al Eds; John Wiley & Sons: Chichester, 2002.

**Example of determination of facial selectivity ratio of 4 (the organic phase of the reaction mixture after saturated NaCl water solution was added) by <sup>19</sup>F NMR:**

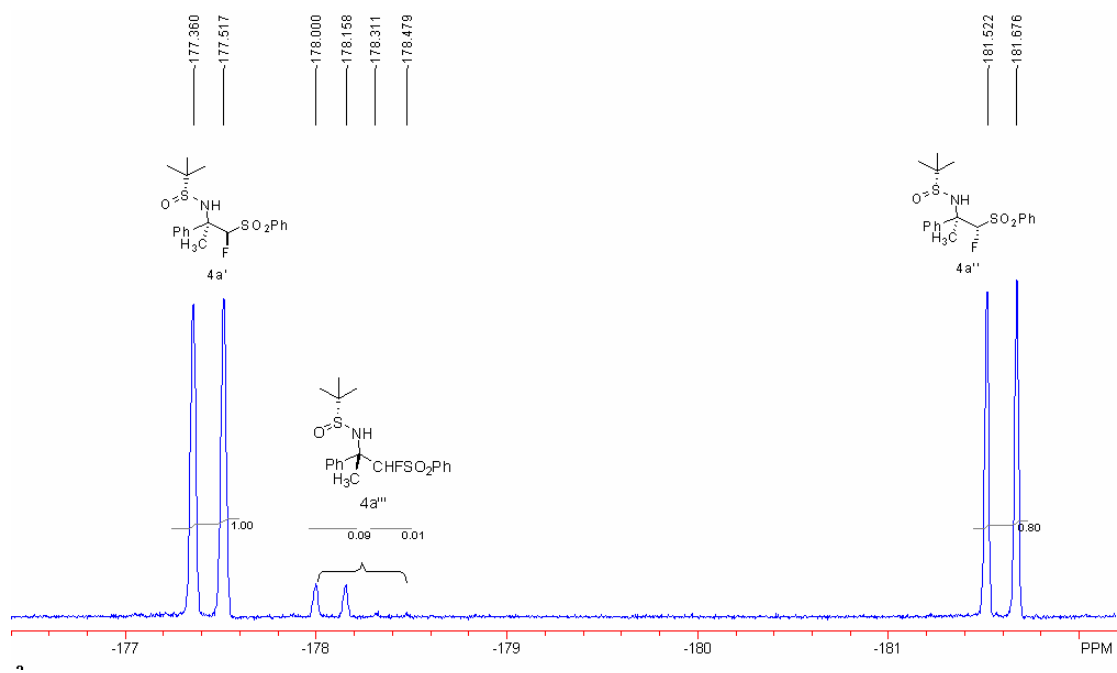

**Determination of the absolute configuration of 4a', 4k'' and 7 by X-ray analysis**

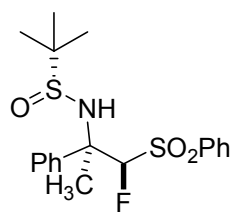

**4a'**

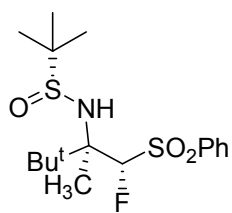

**4k'**

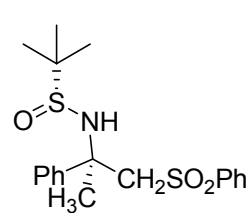

**7**

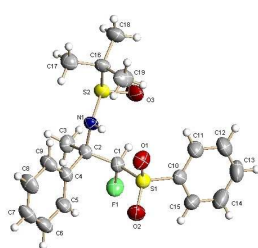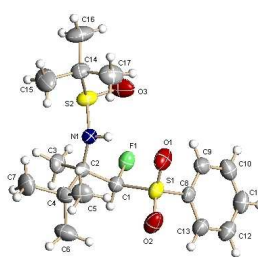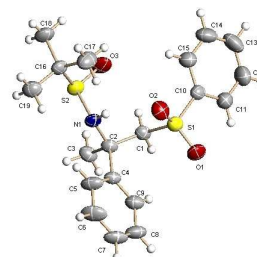

**NMR spectra for all isolated products**

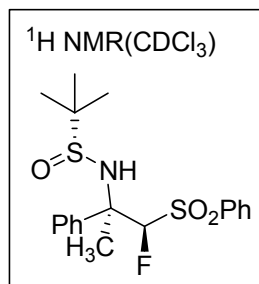

**4a'**

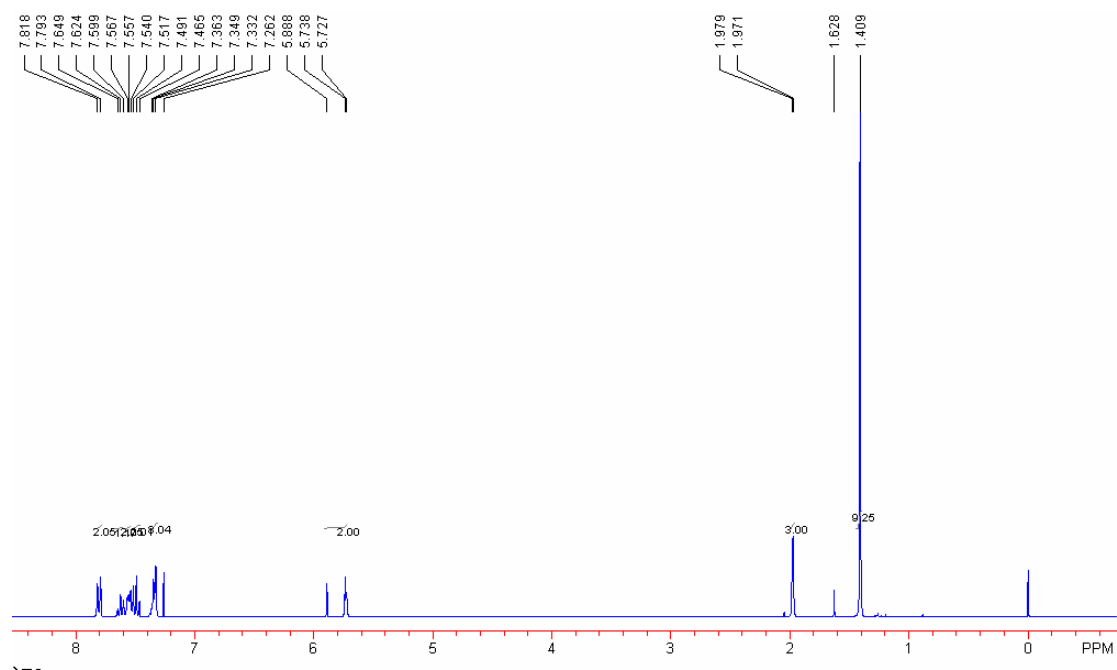

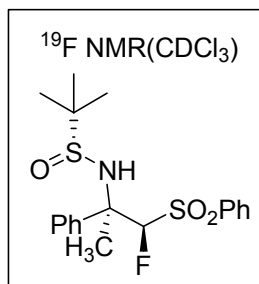

**4a'**

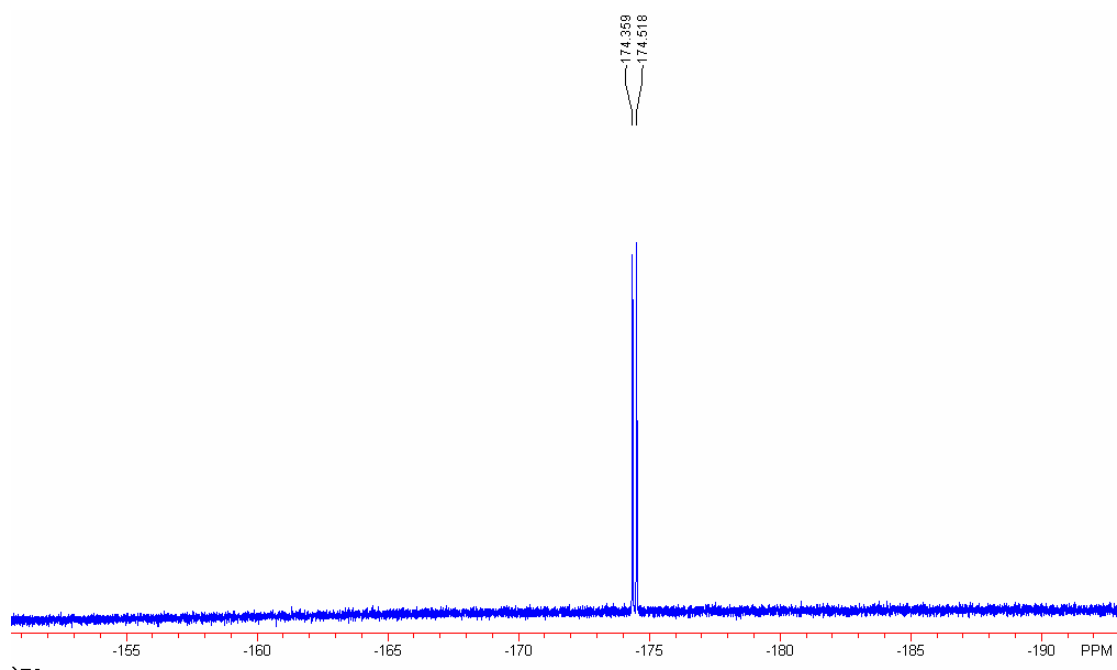



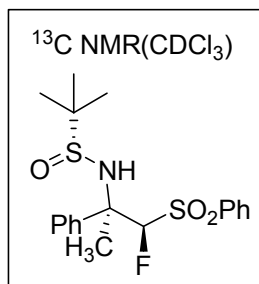

**4a'**

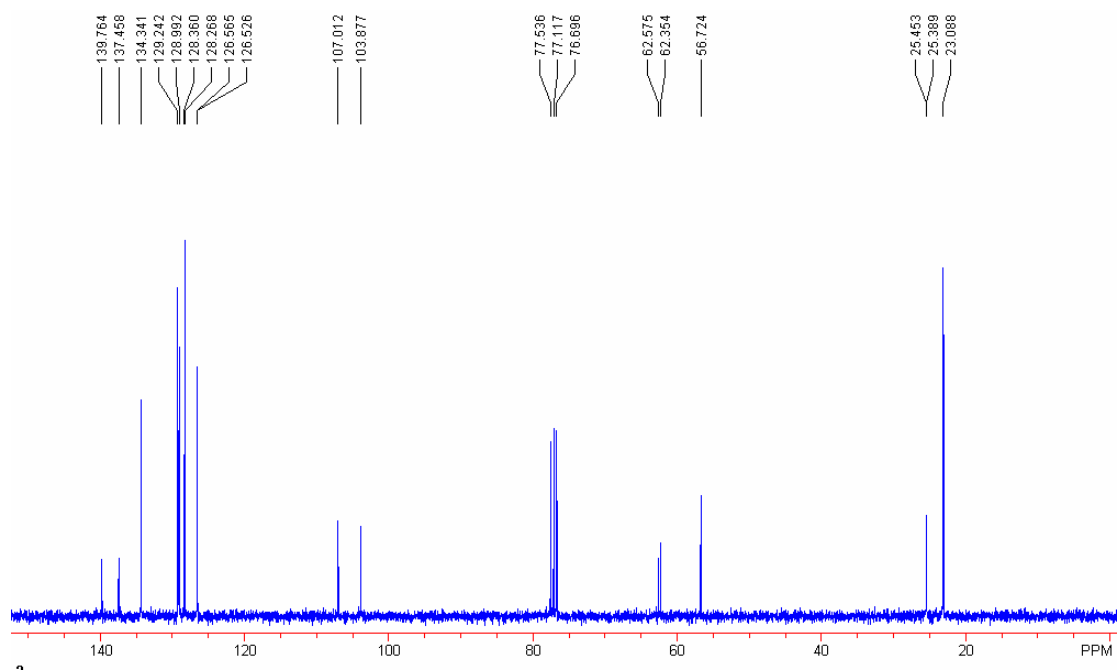

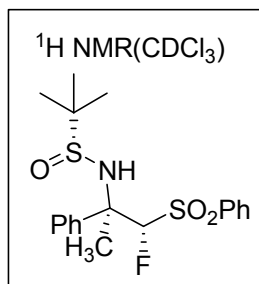

**4a''**

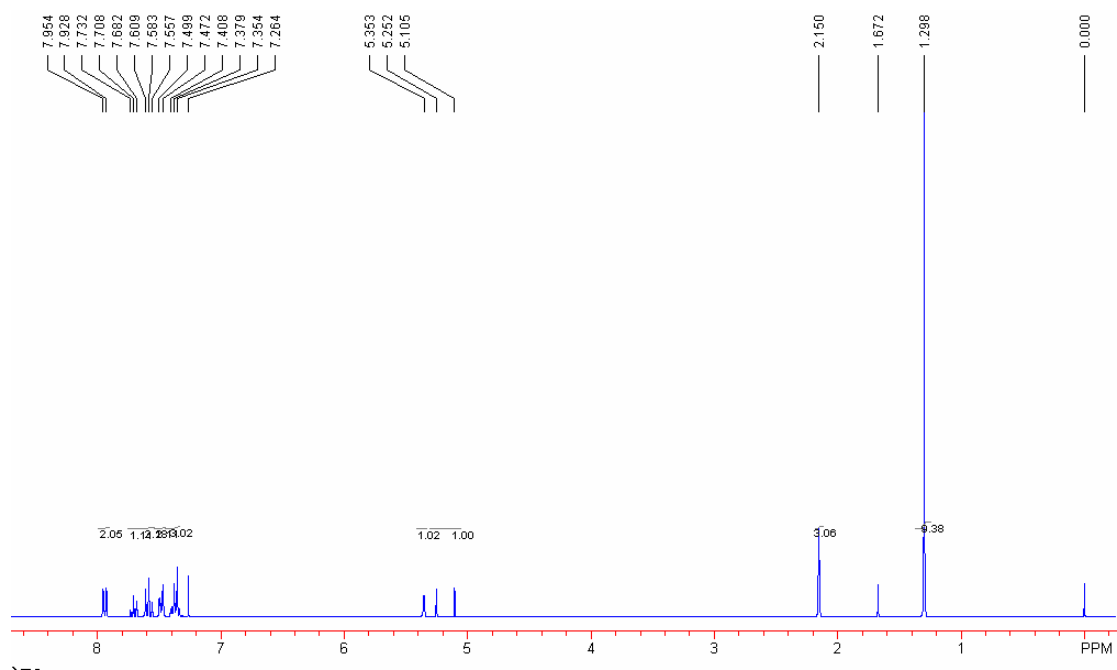

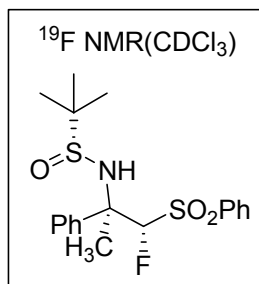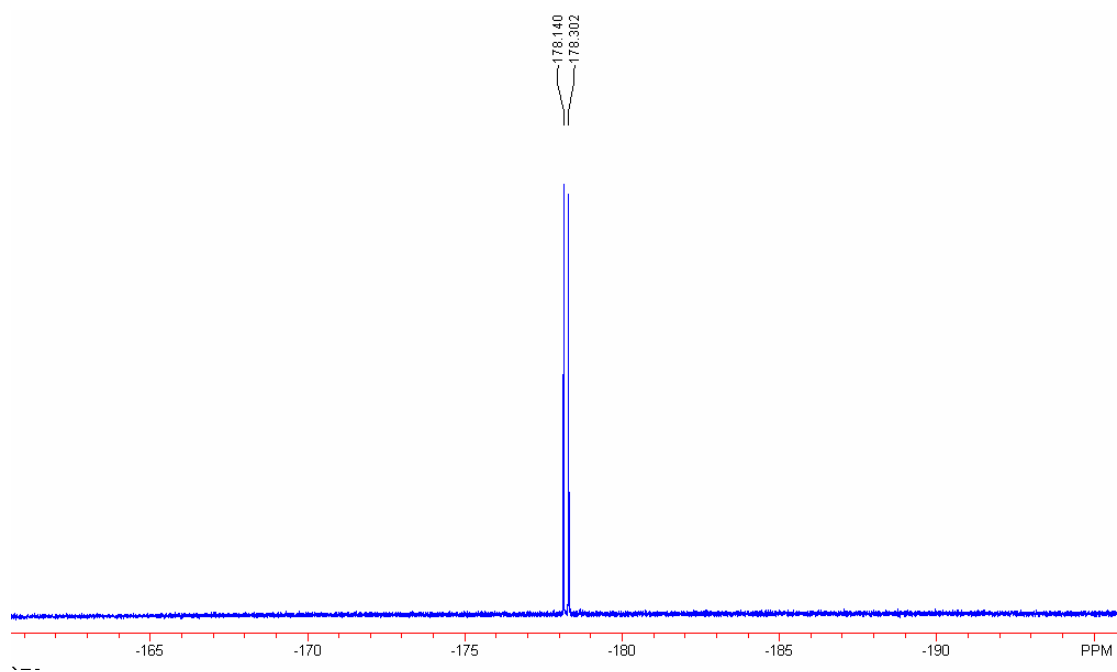

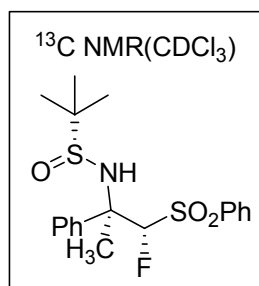

**4a''**

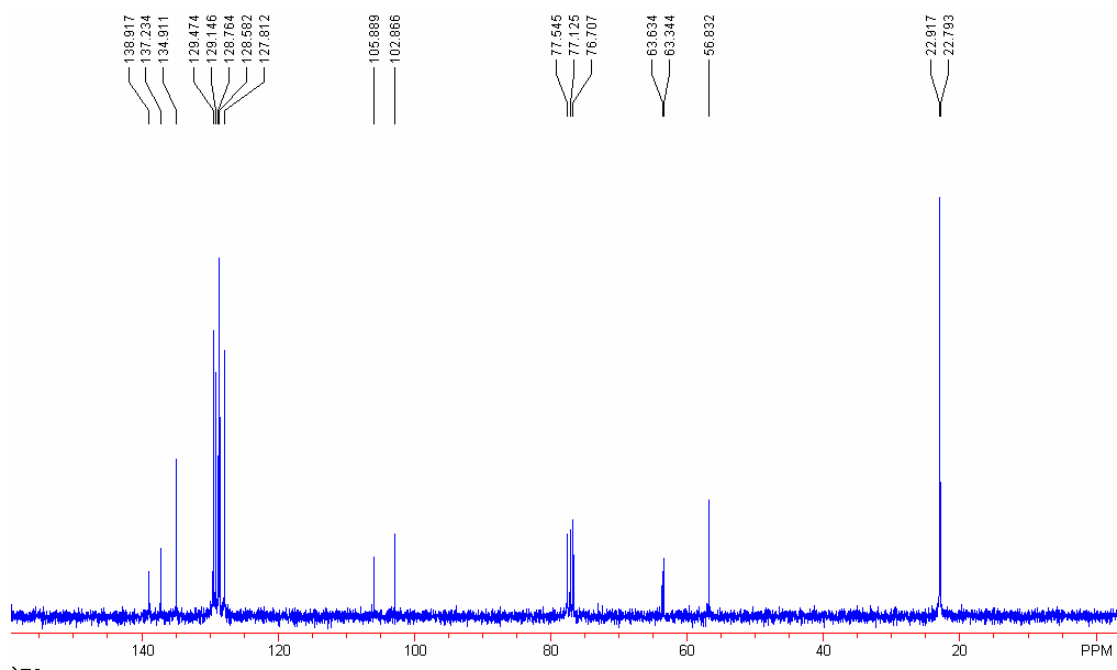

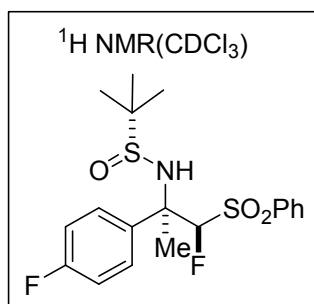

**4b'**

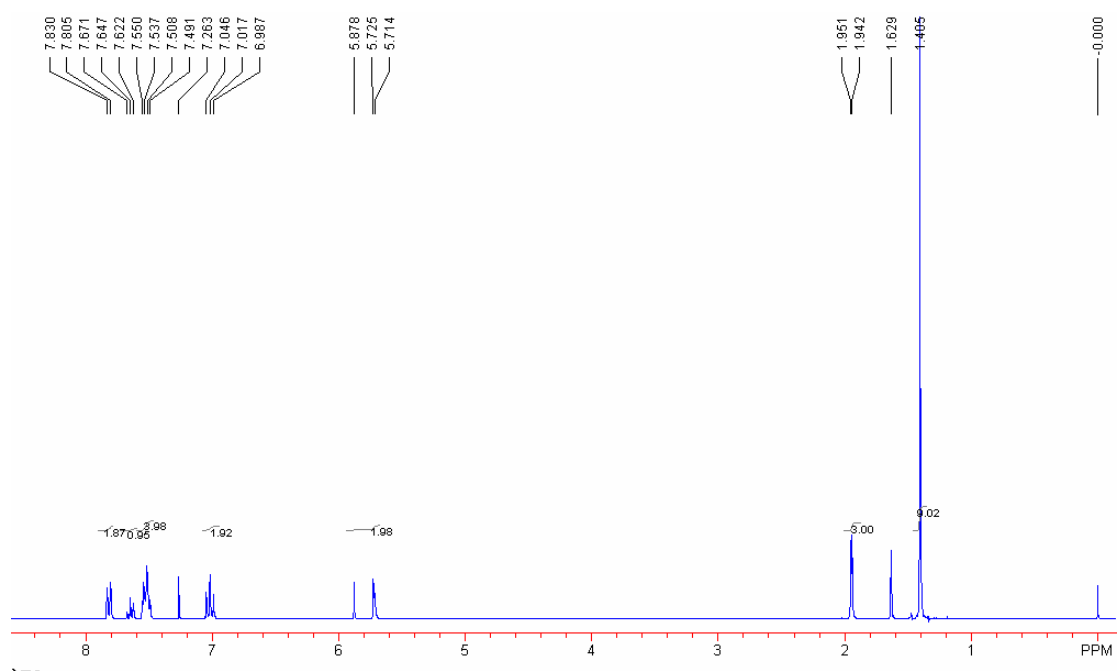

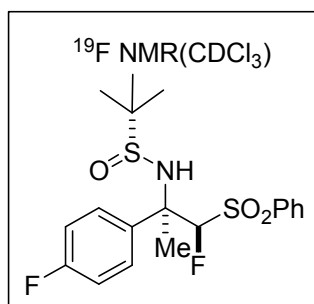

**4b'**

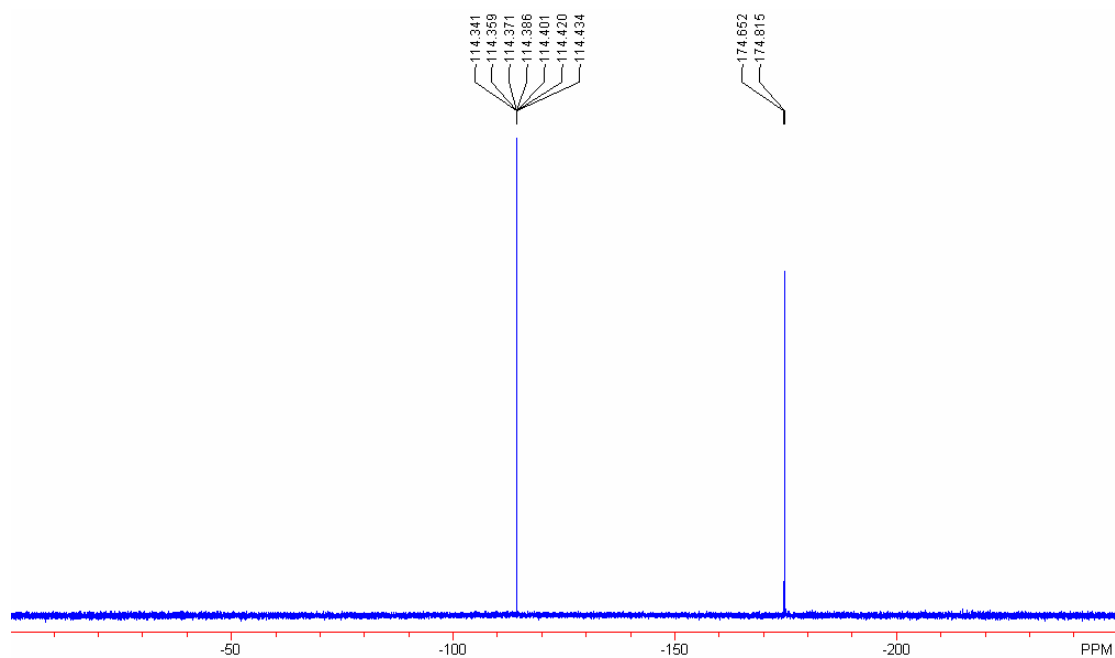

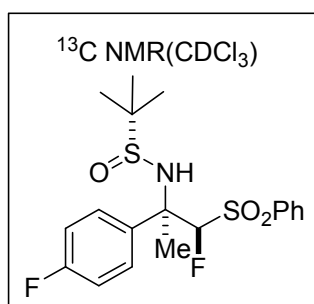

**4b'**

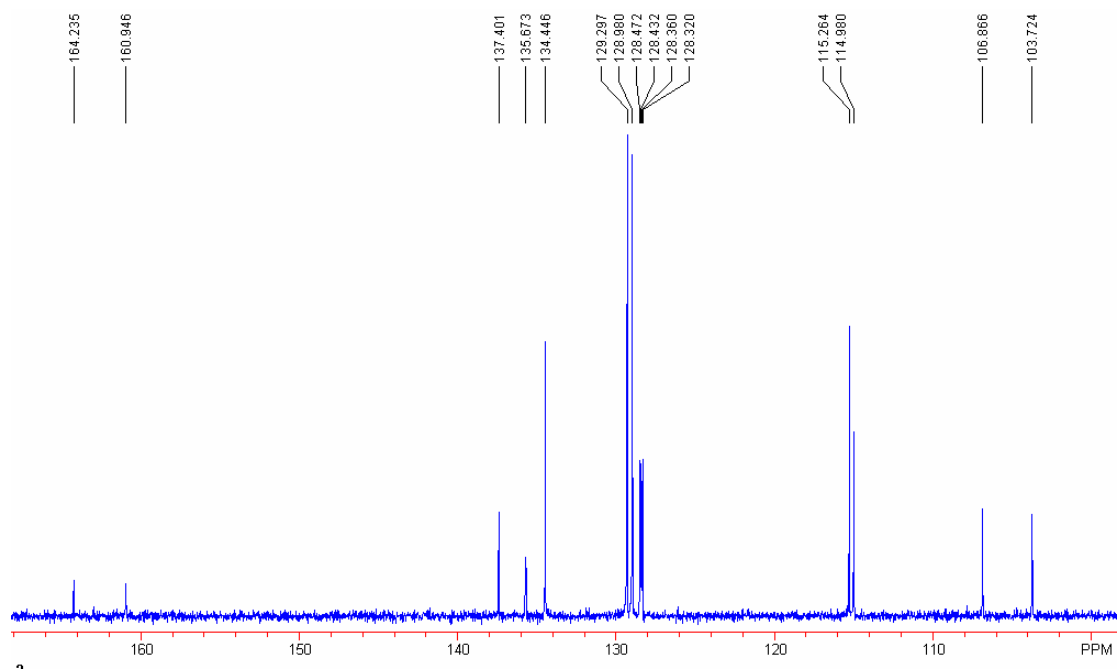

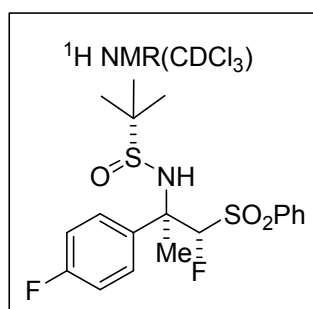

**4b''**

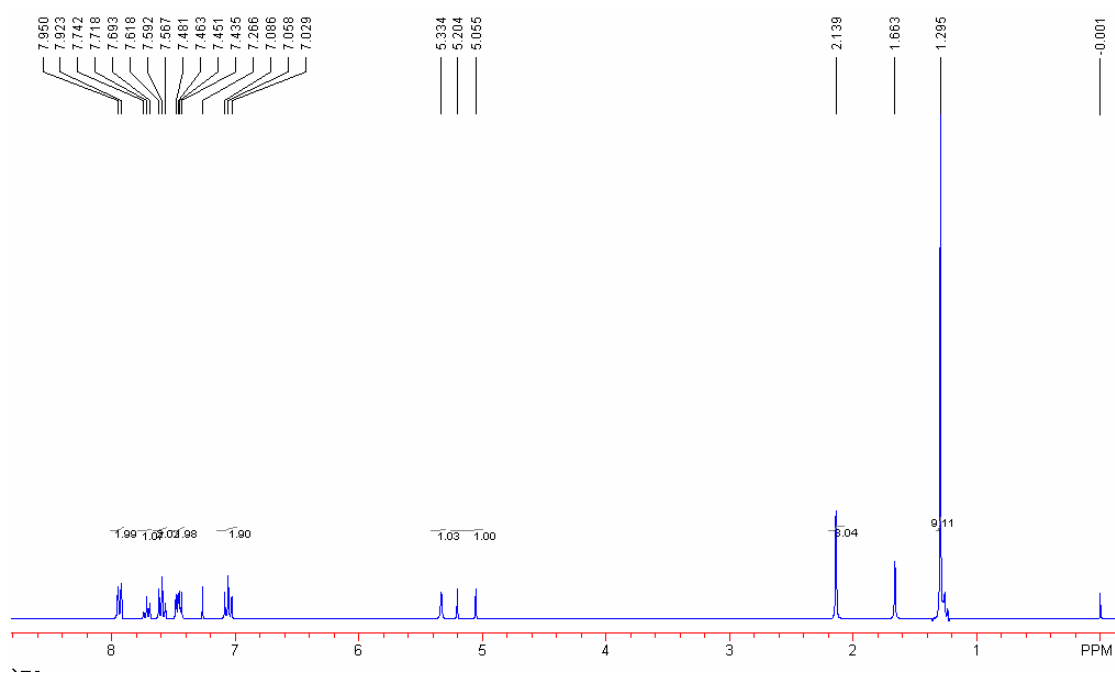



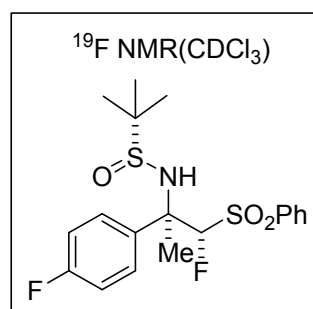

**4b''**

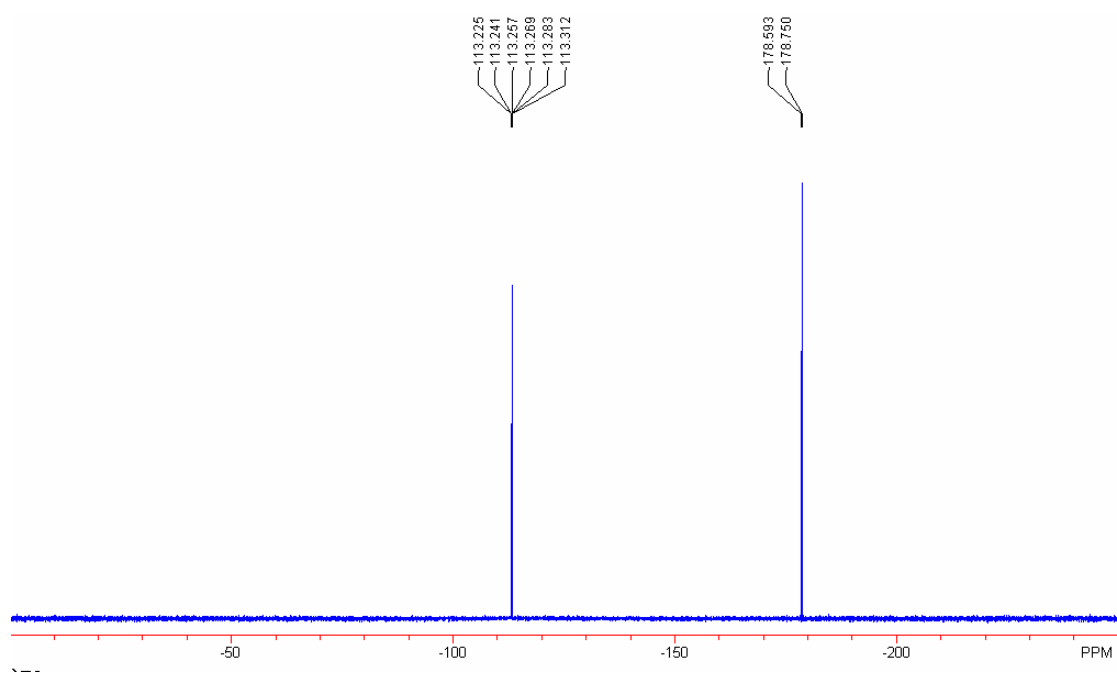

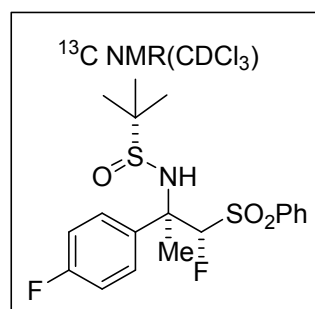

**4b''**

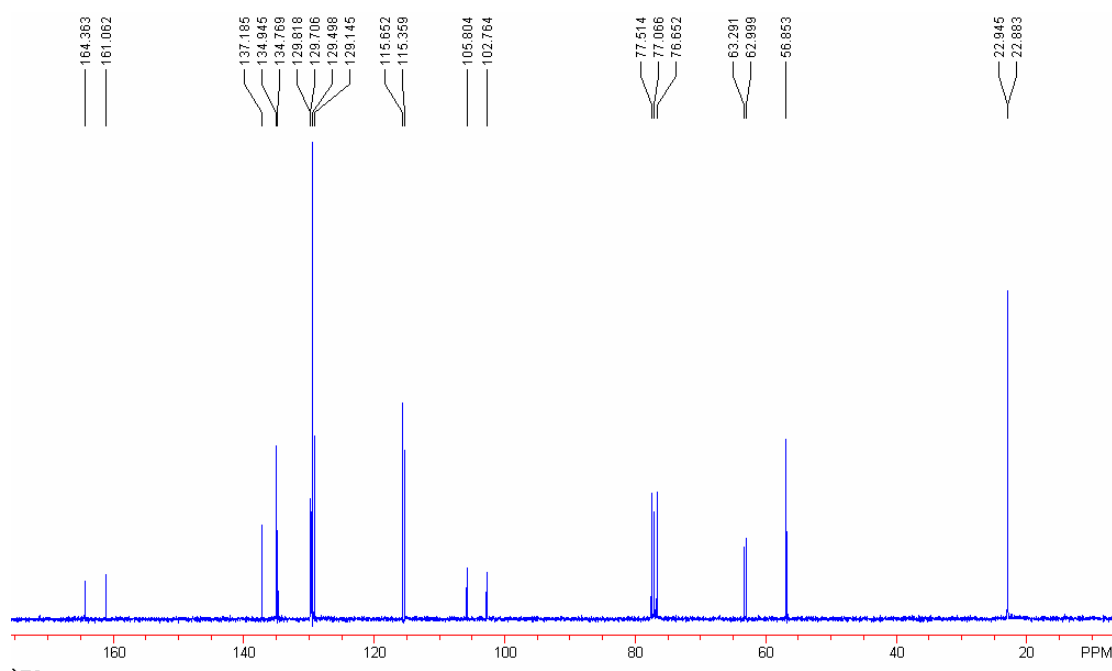

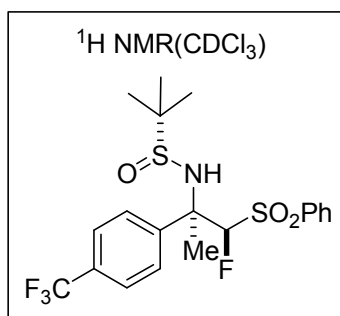

**4c'**

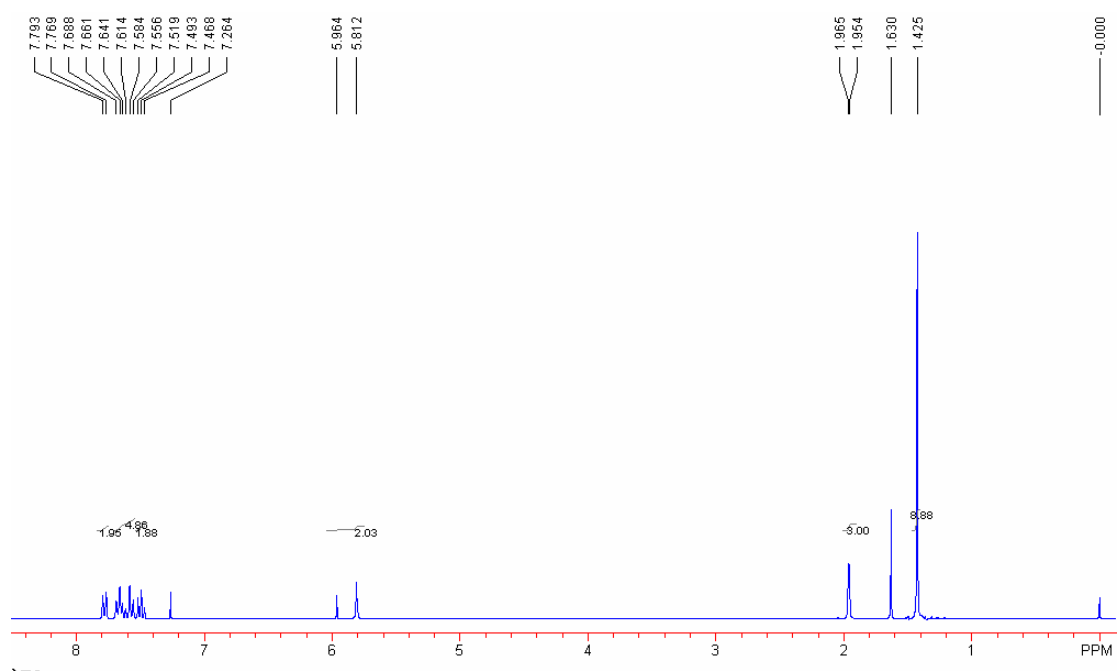

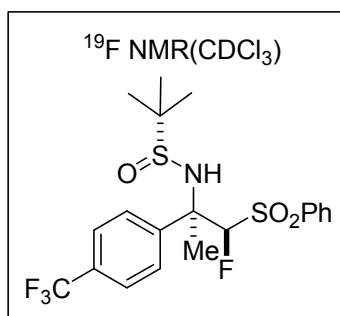

**4c'**

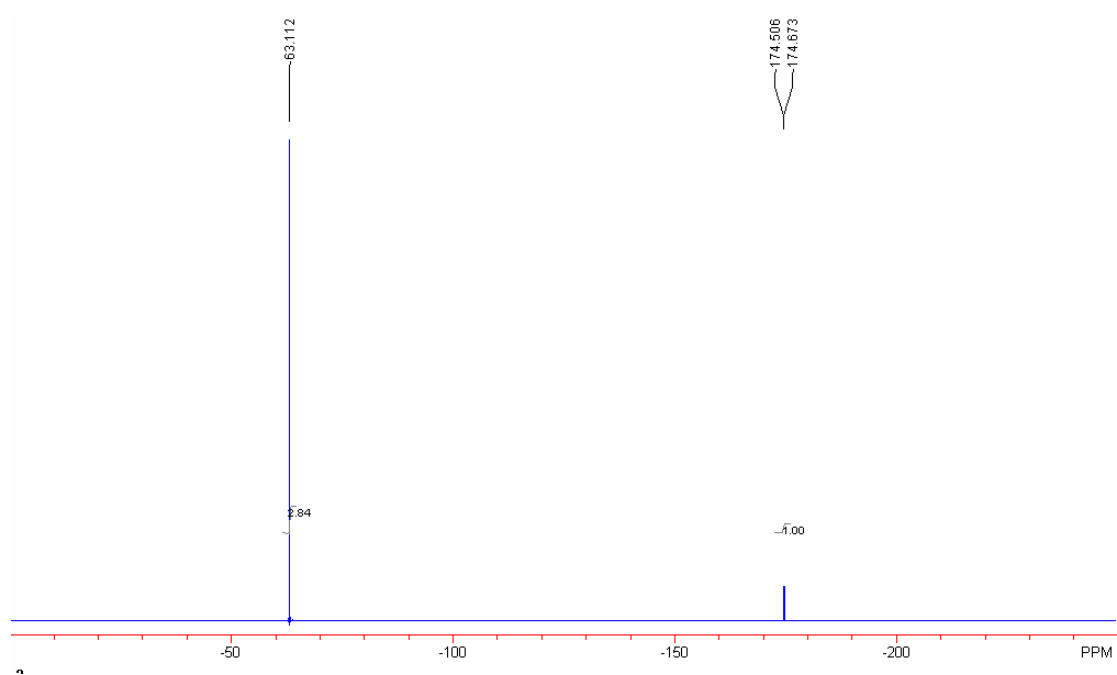

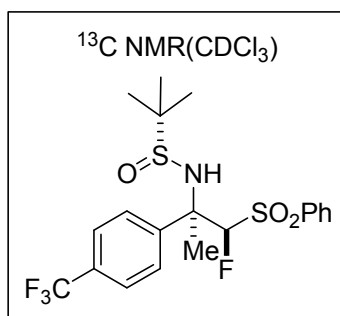

4c'

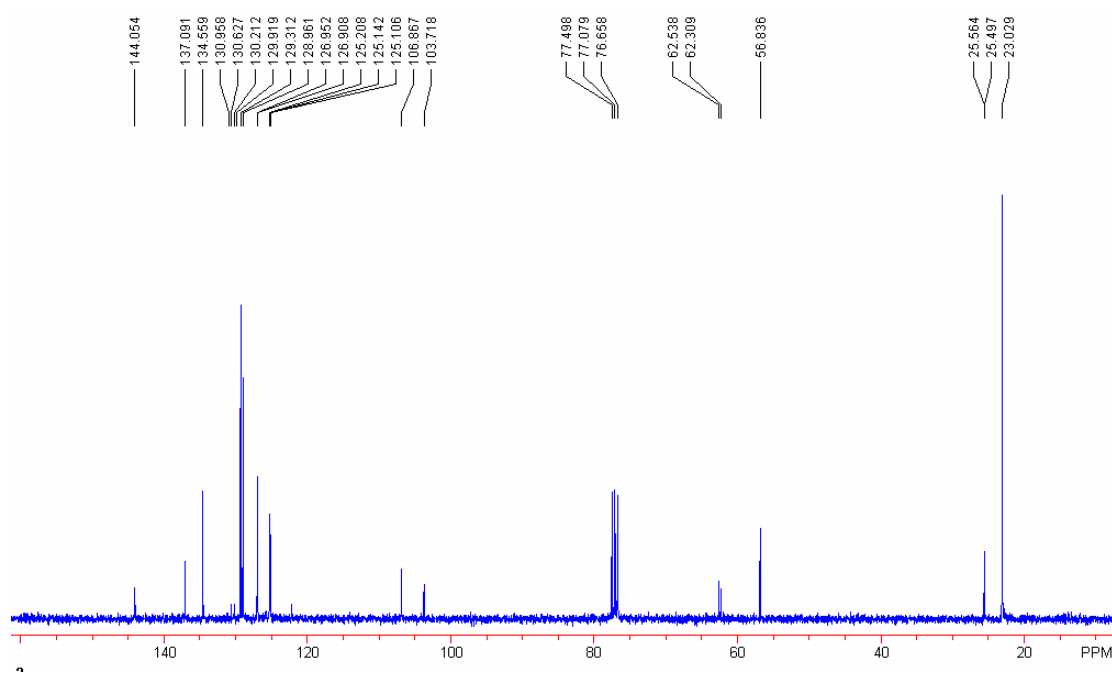

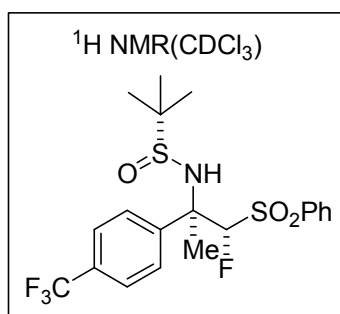

**4c''**

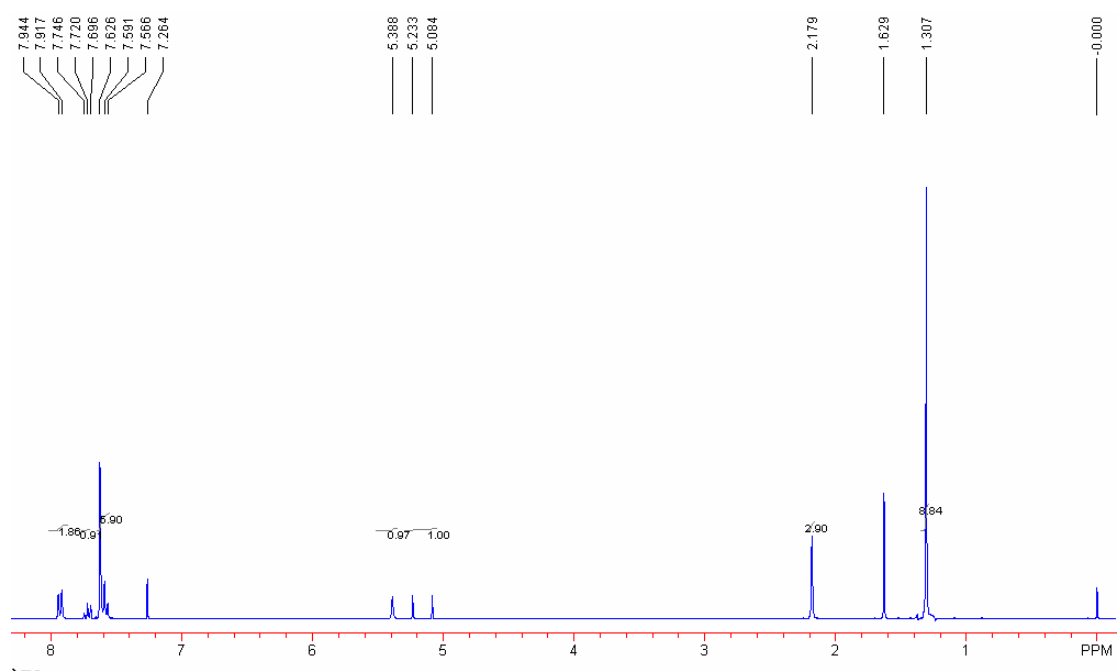

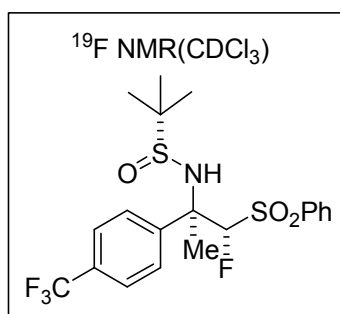

**4c''**

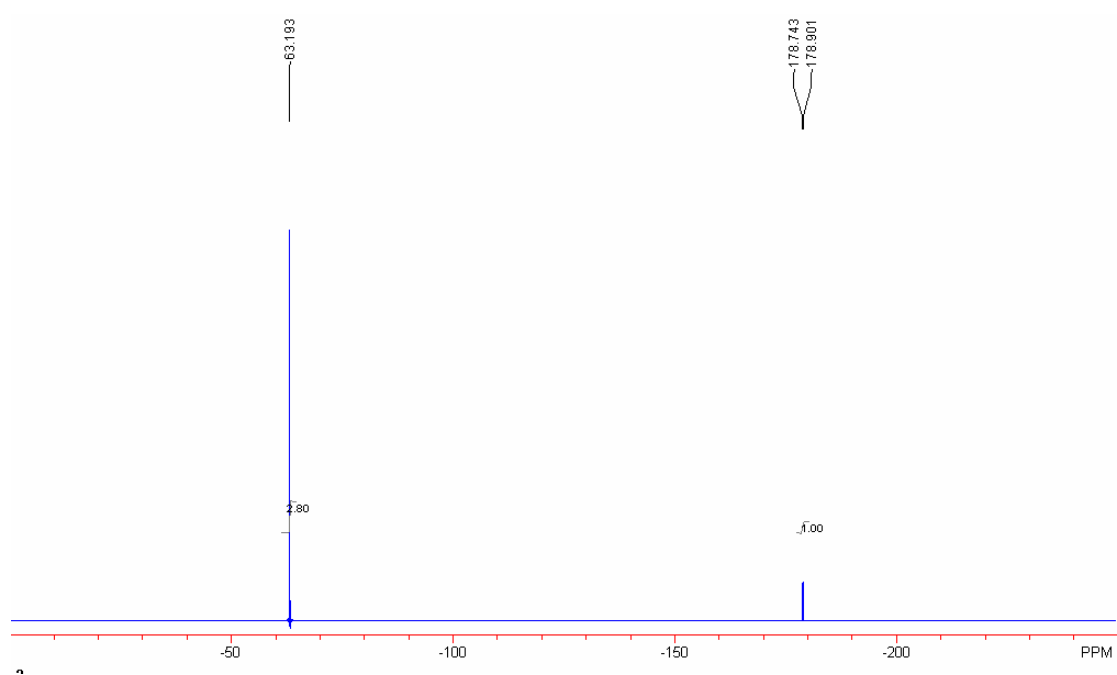

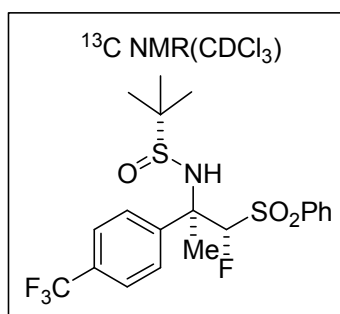

**4c''**

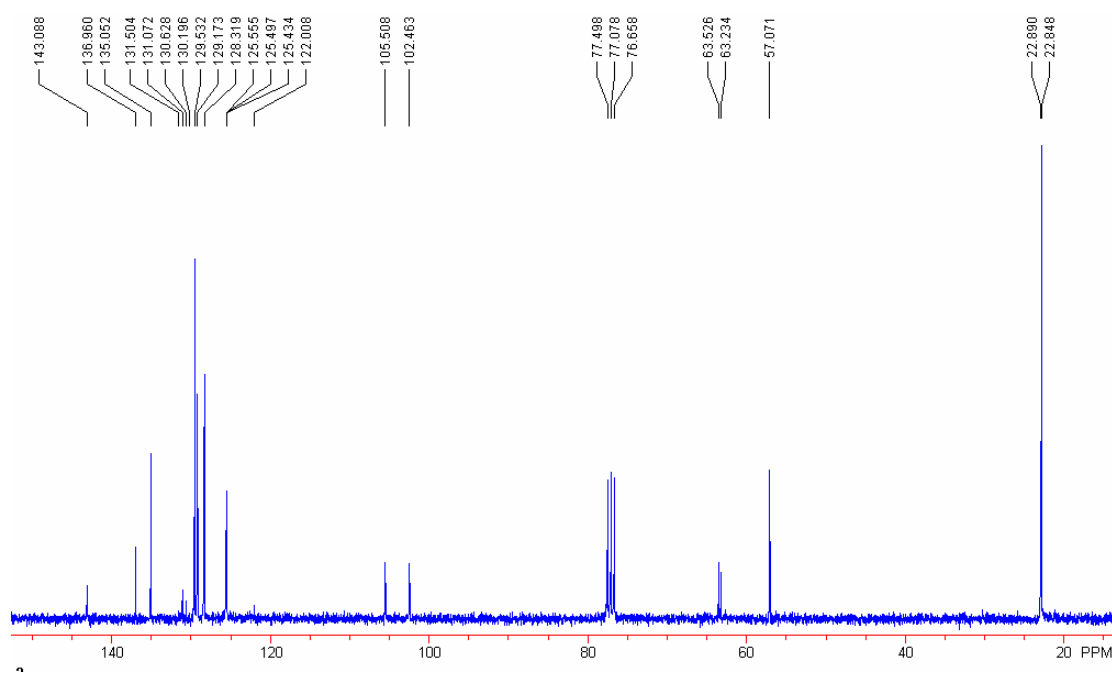



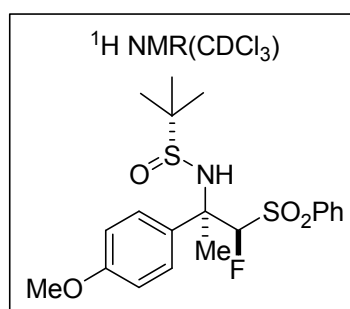

**4d'**

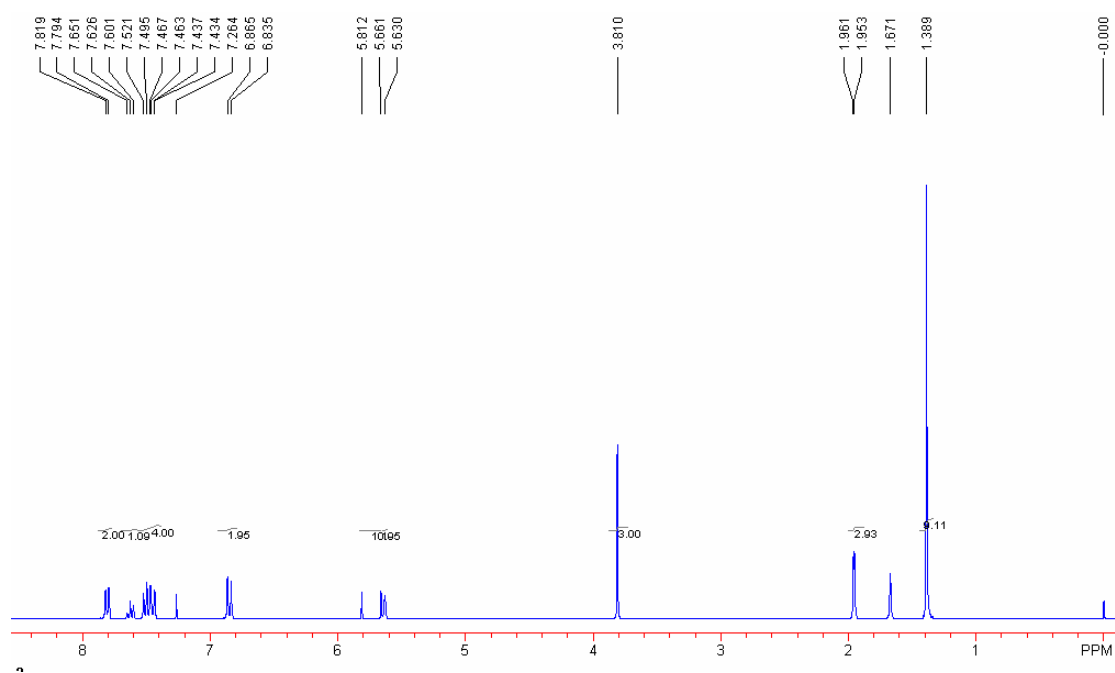

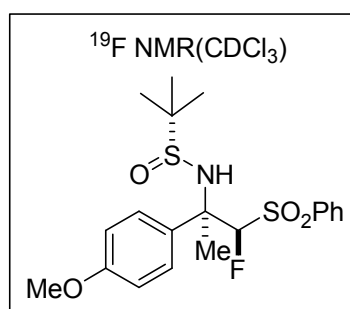

**4d'**

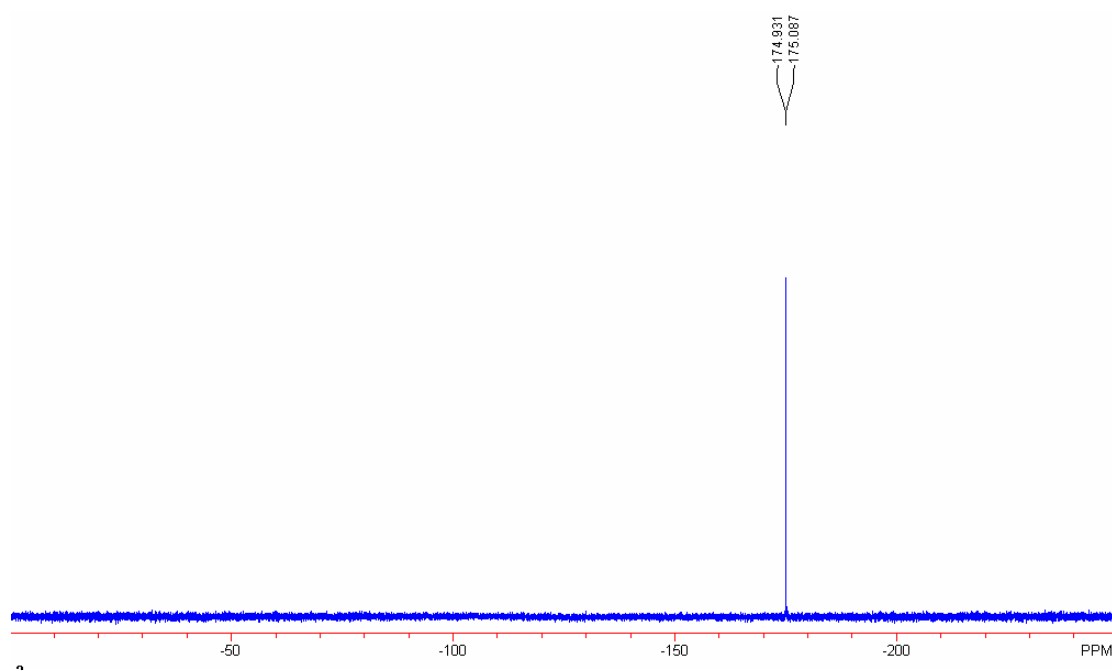

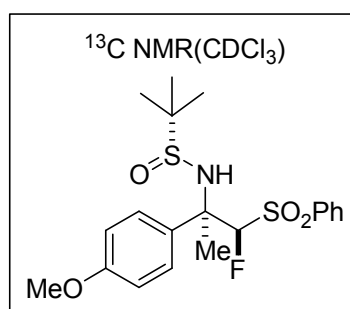

**4d'**

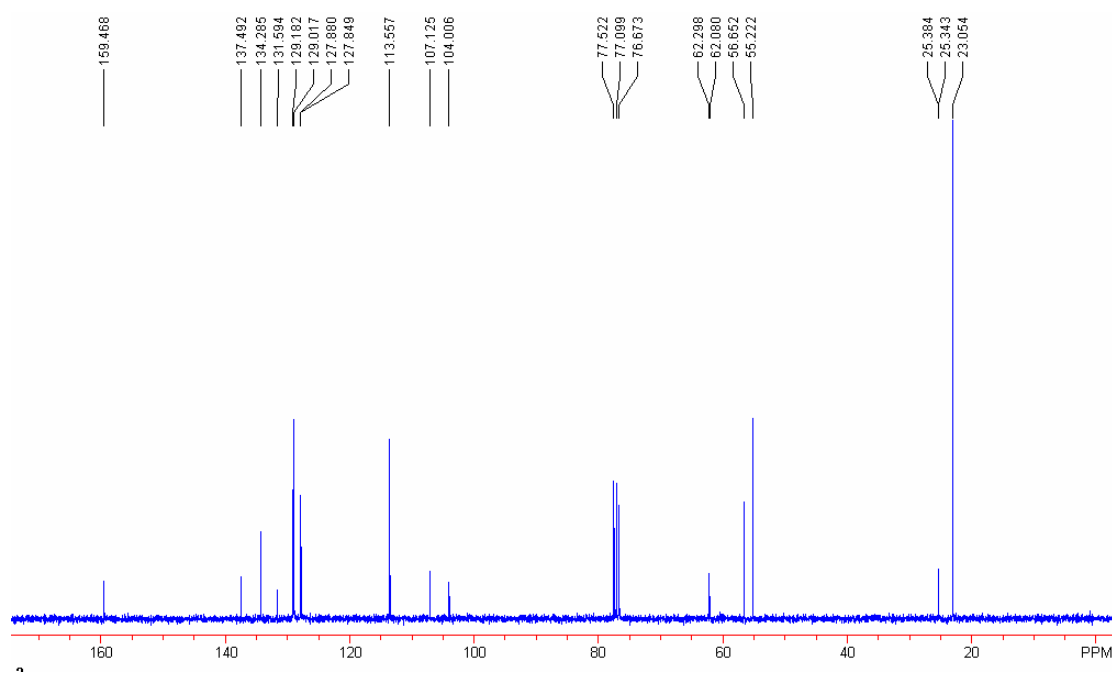

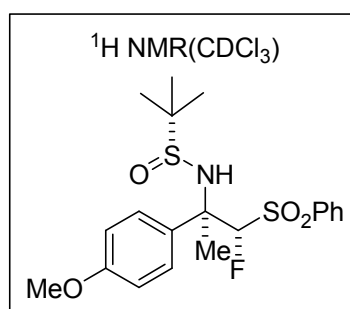

**4d''**

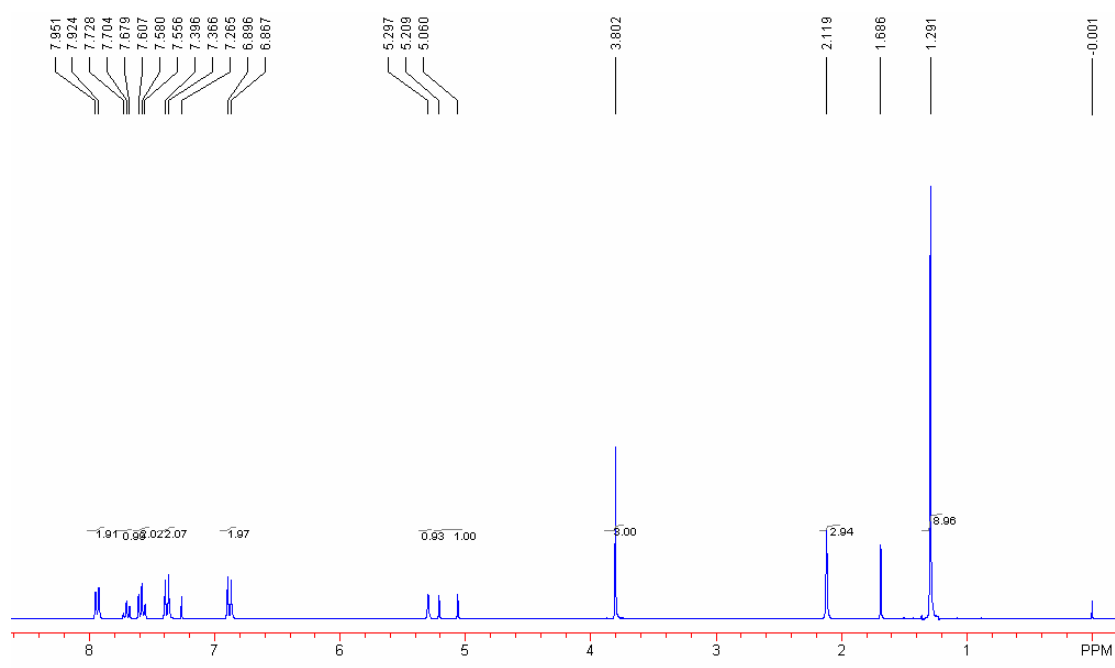

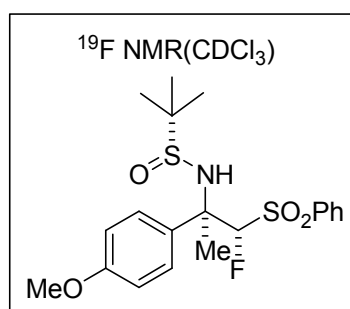

**4d''**

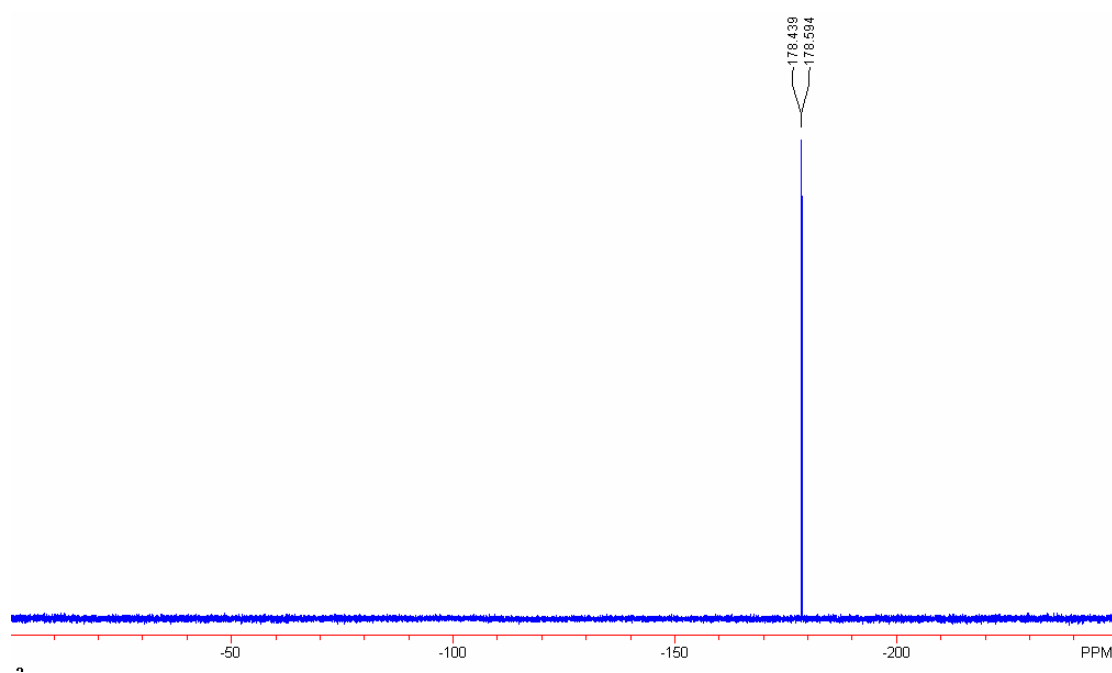

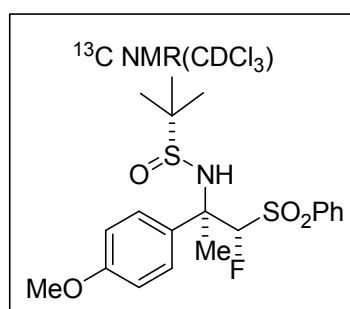

**4d''**

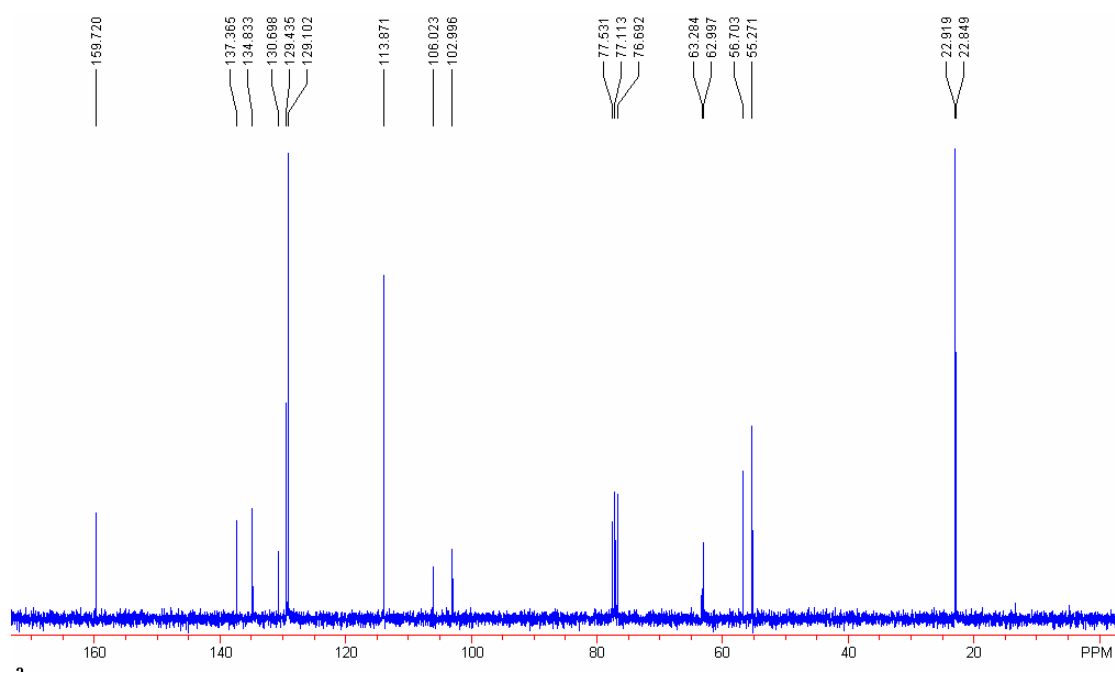

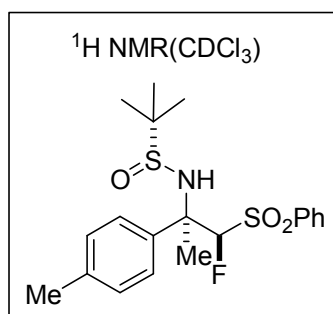

**4e'**

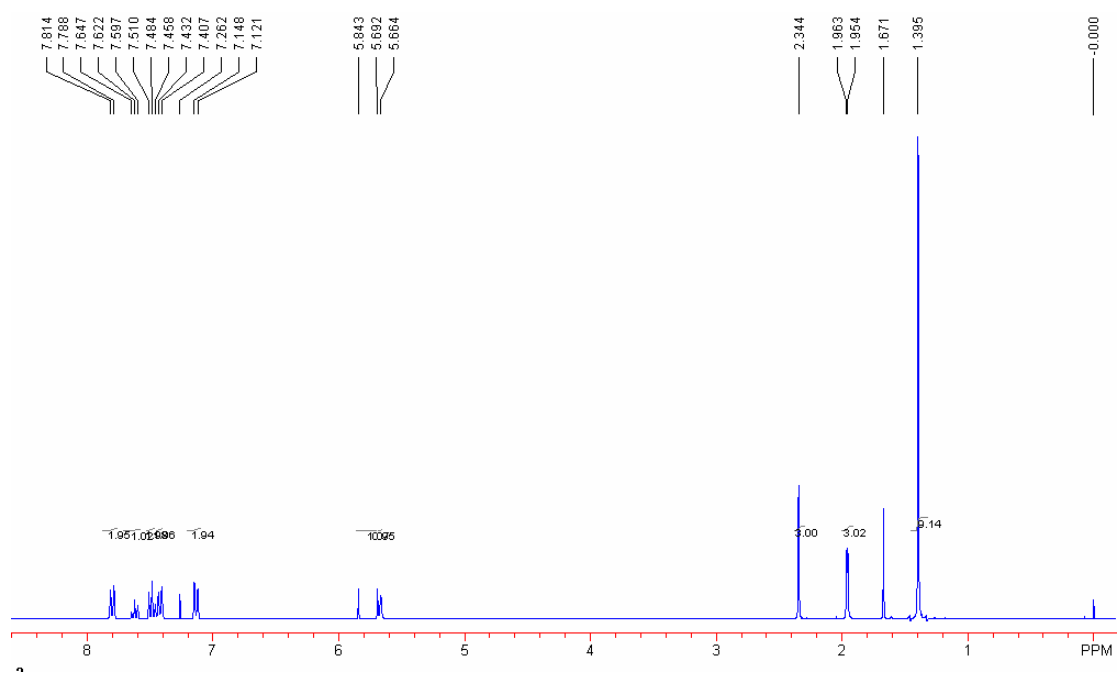

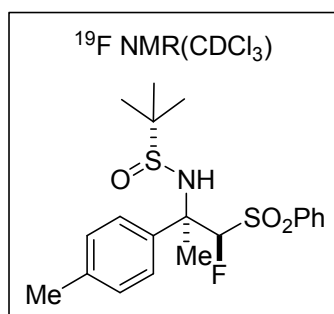

4e'

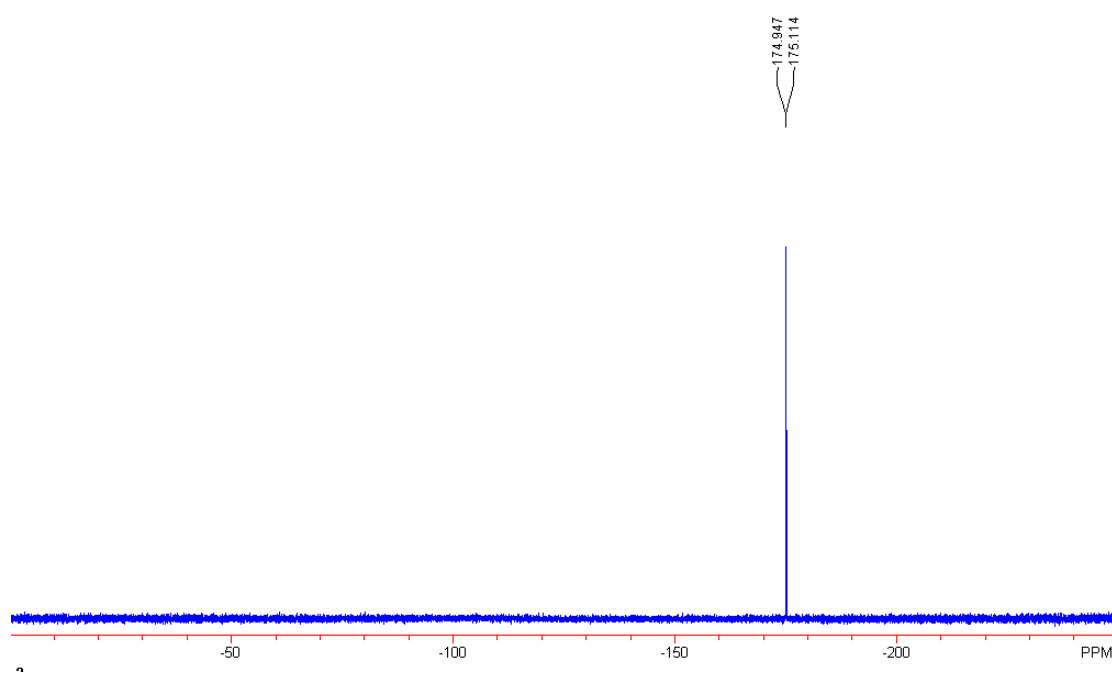



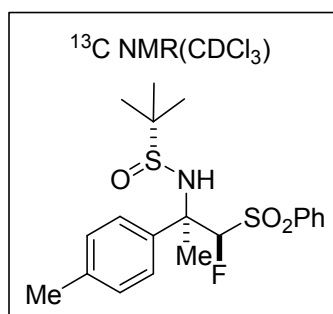

**4e'**

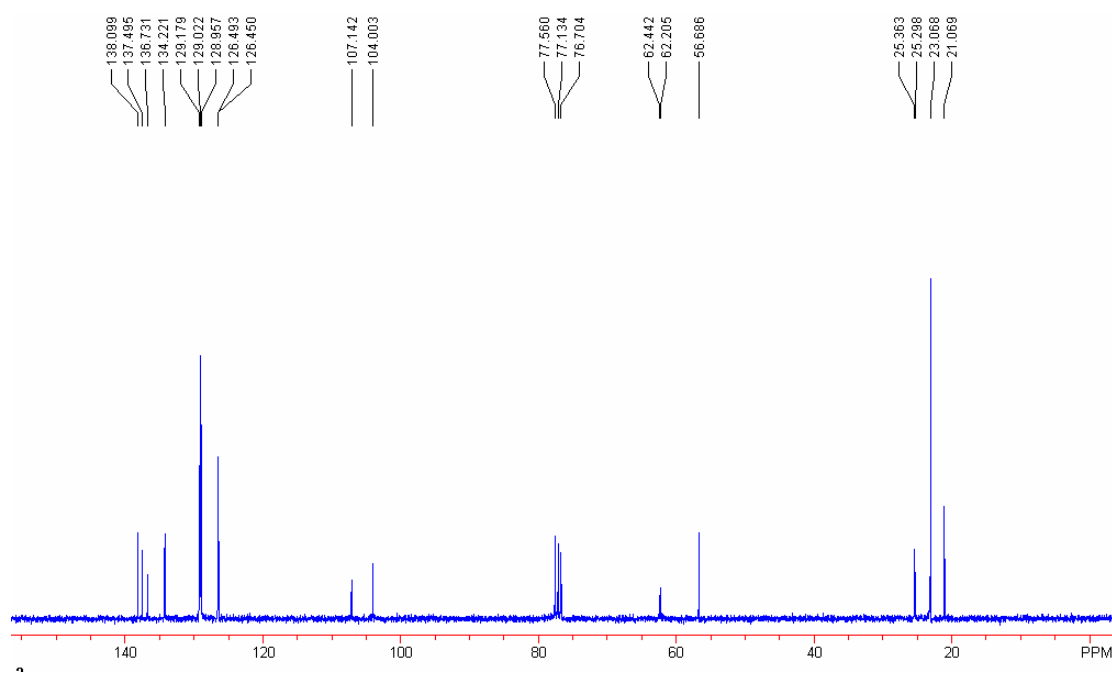

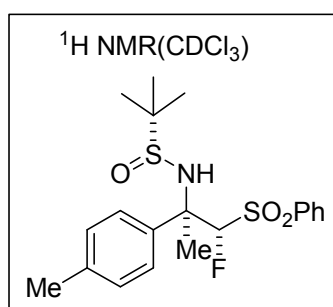

**4e''**

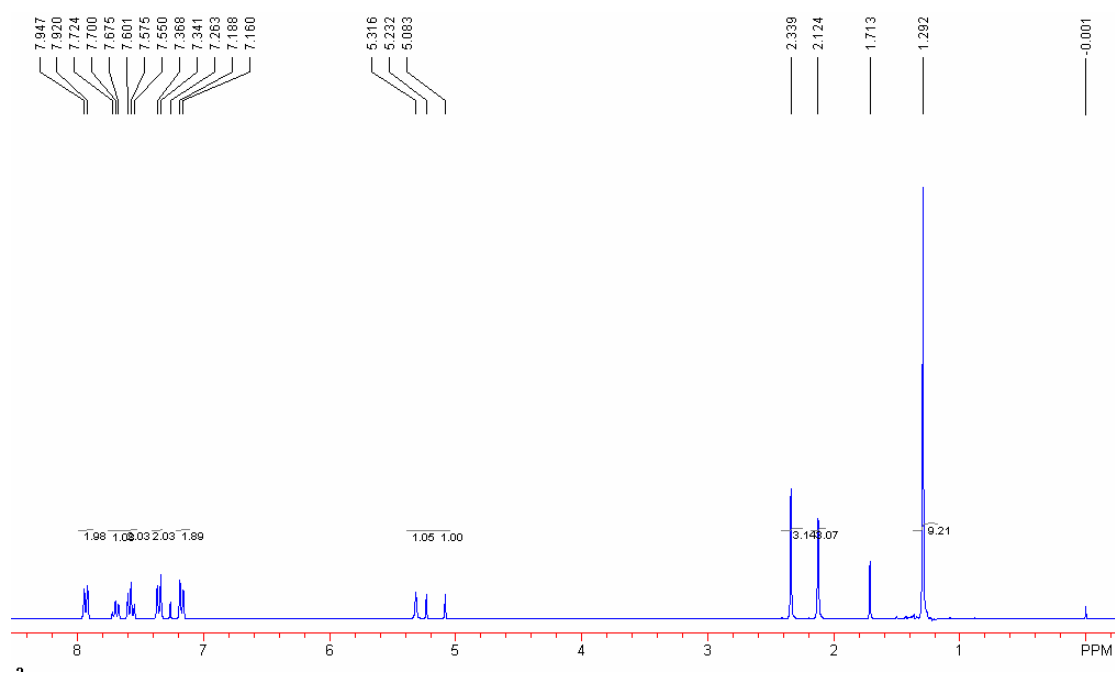

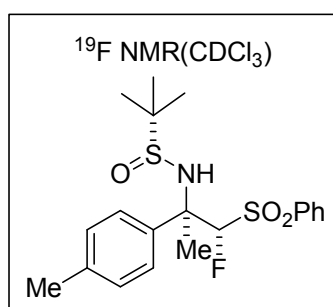

**4e''**

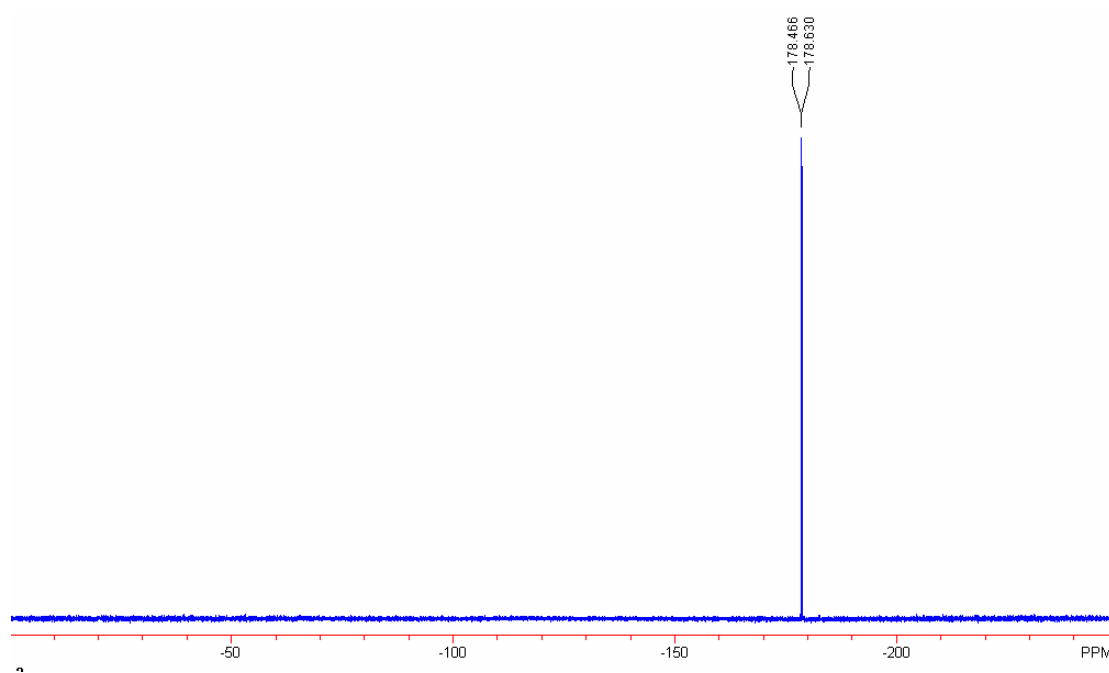

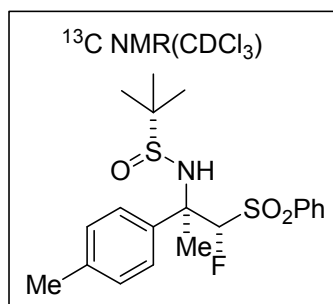

**4e''**

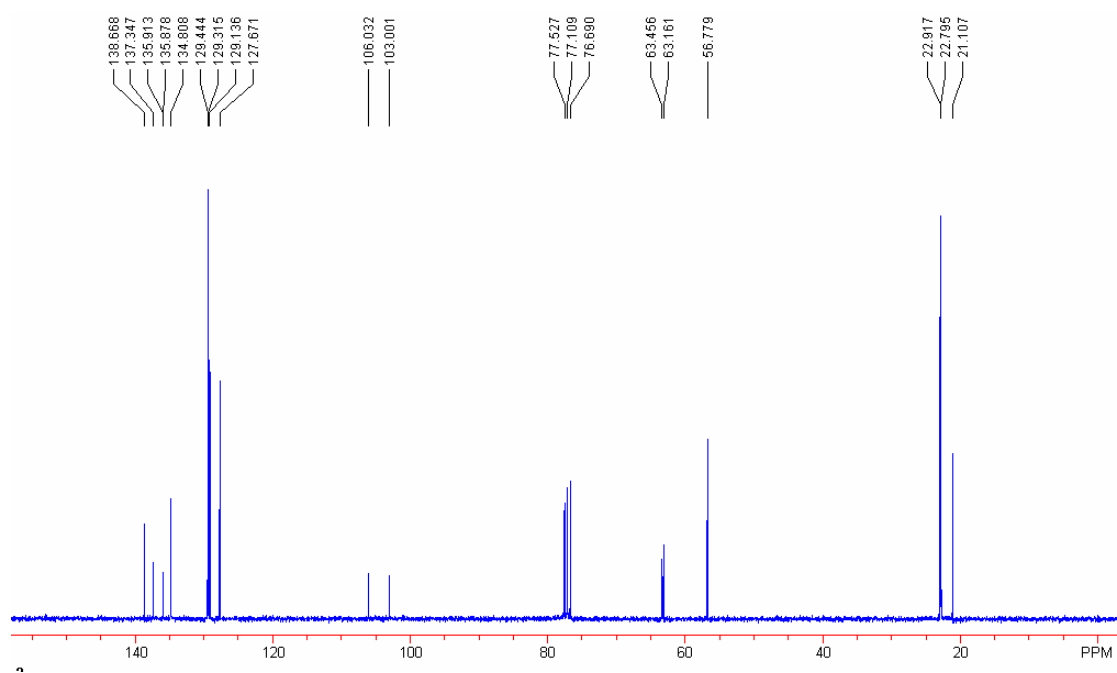

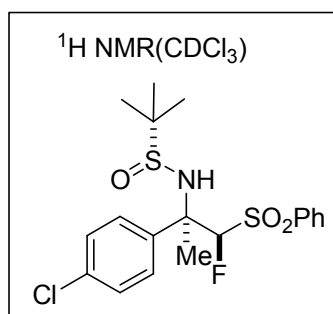

**4f'**

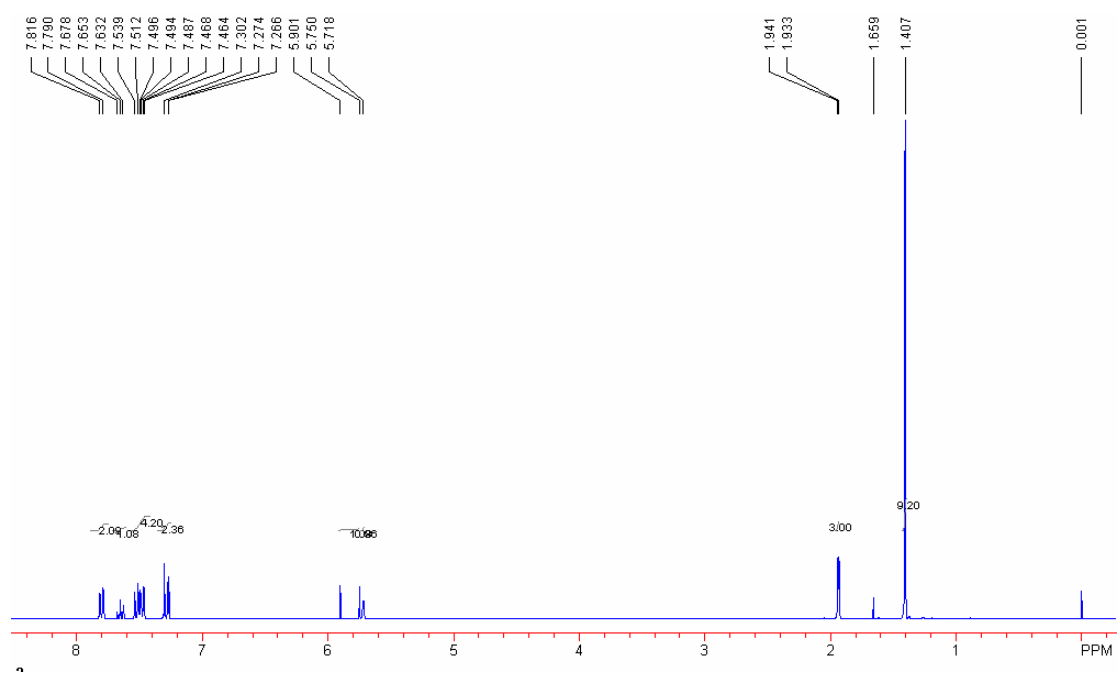

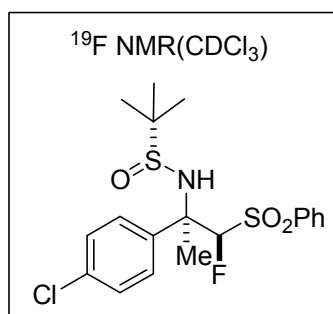

**4f'**

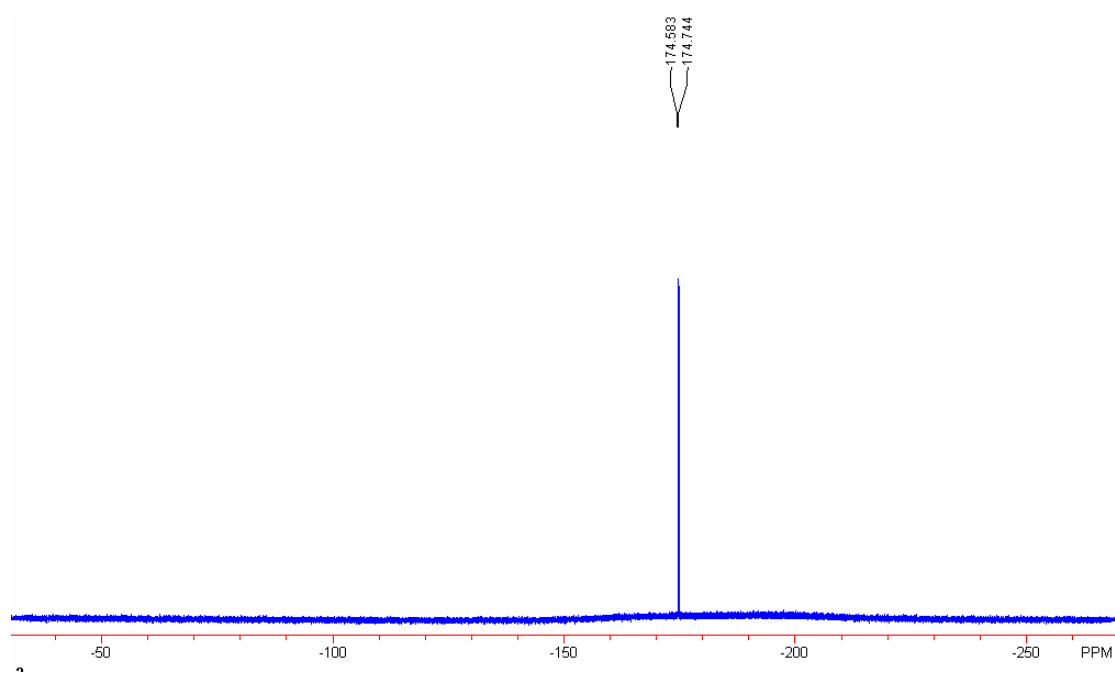

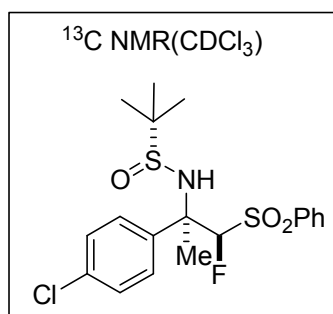

**4f'**

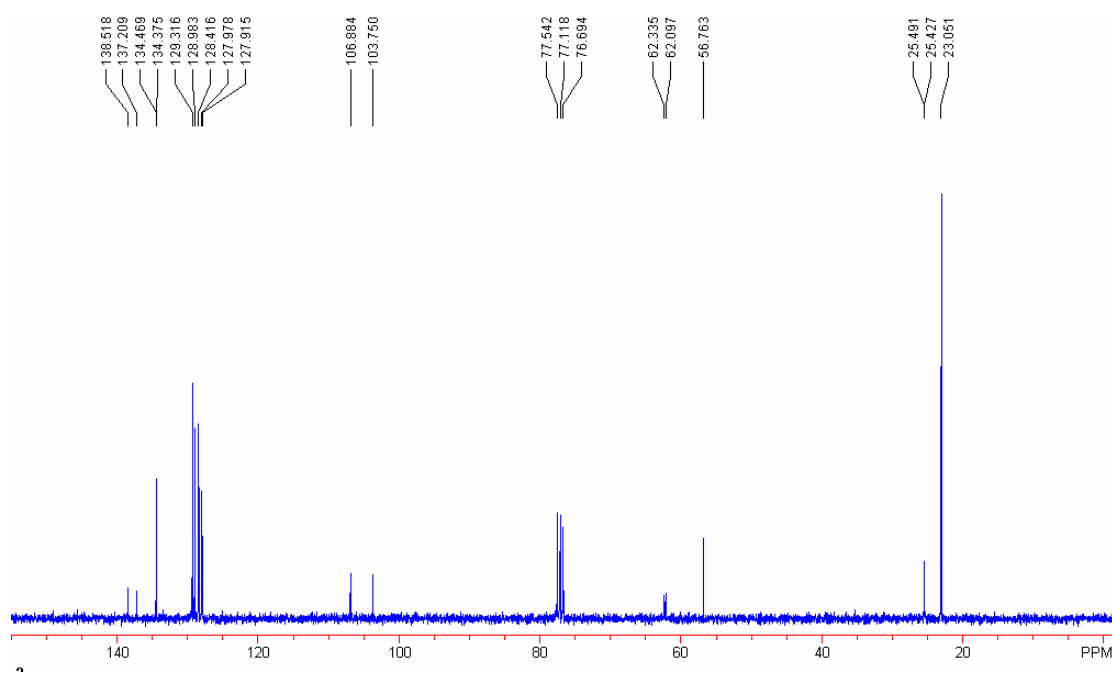

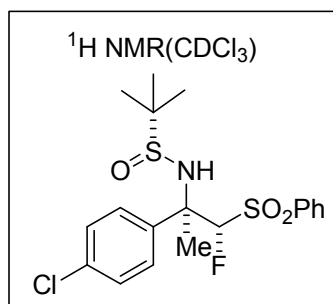

**4f''**

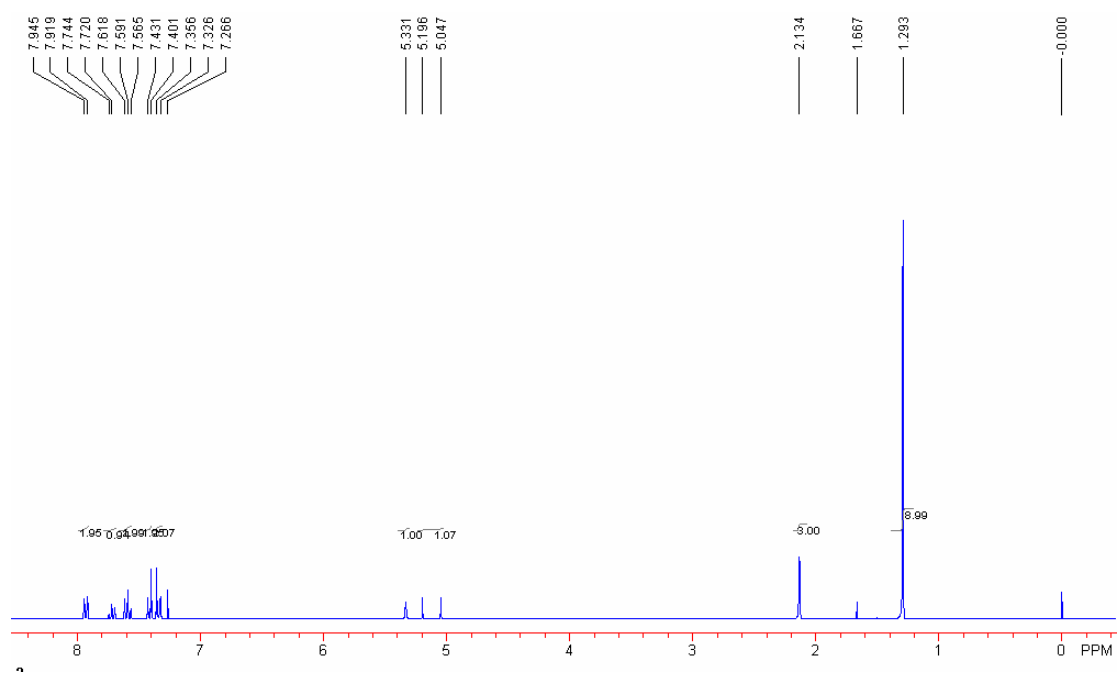



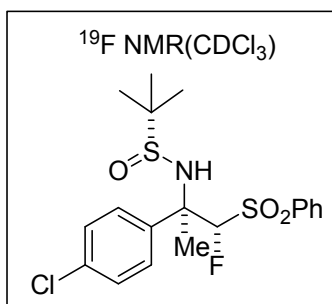

**4f''**

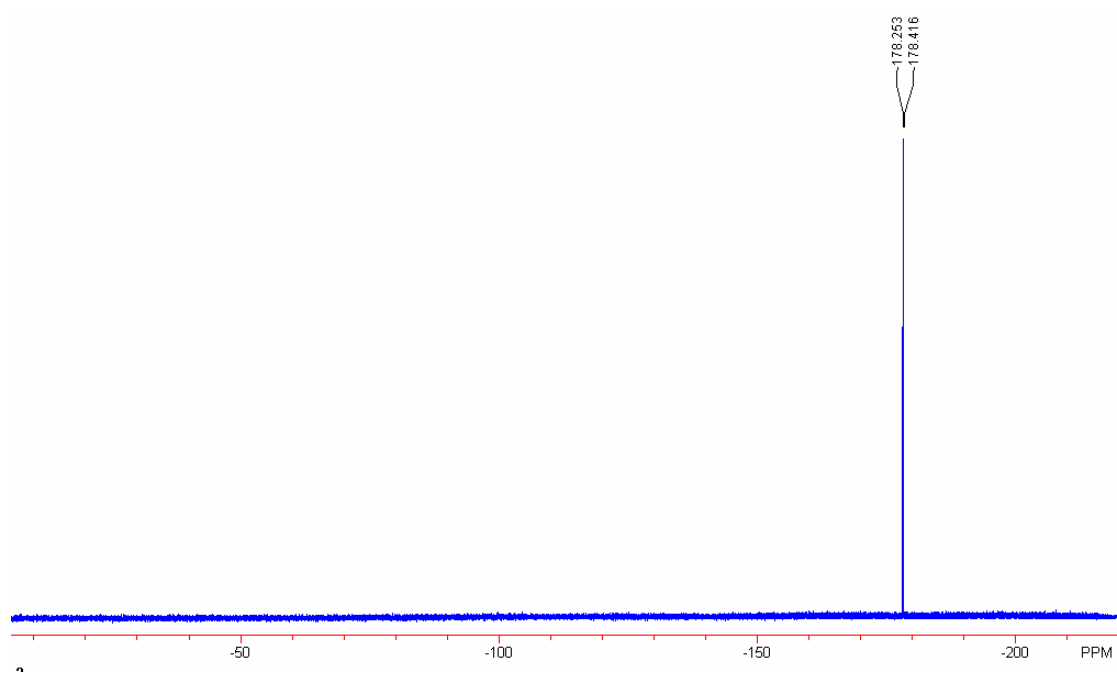

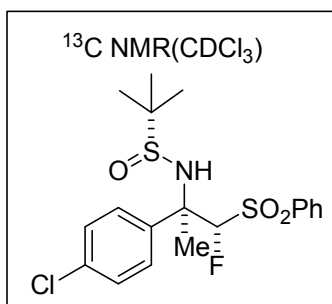

**4f''**

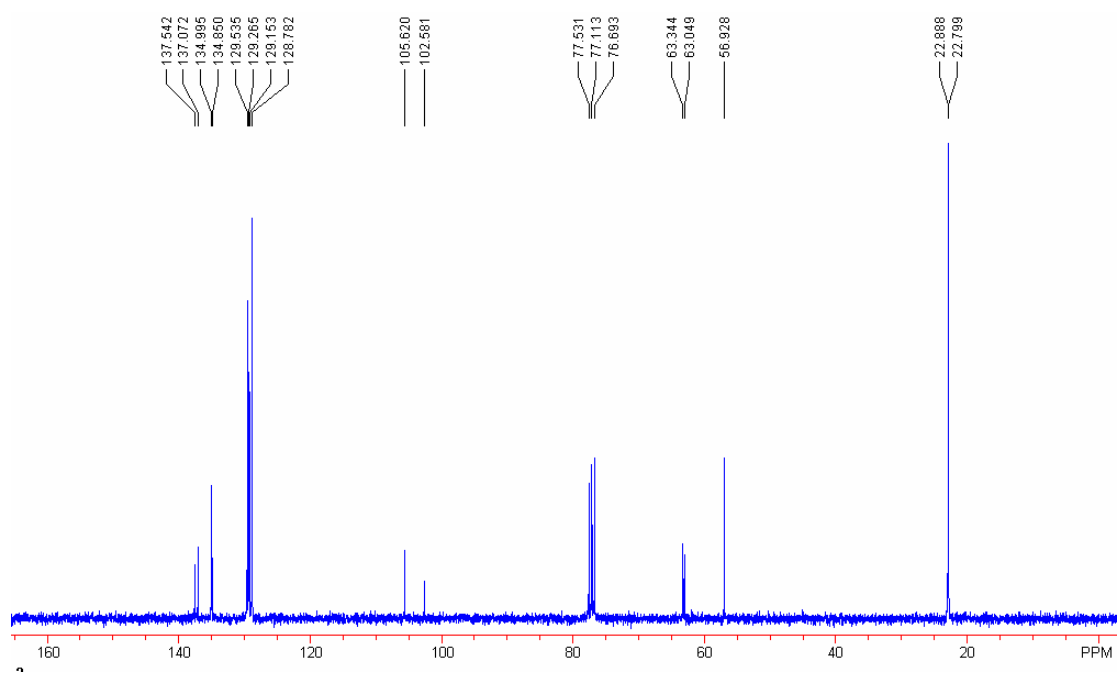

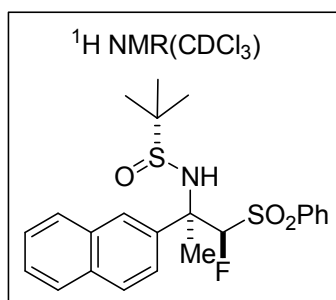

**4g**

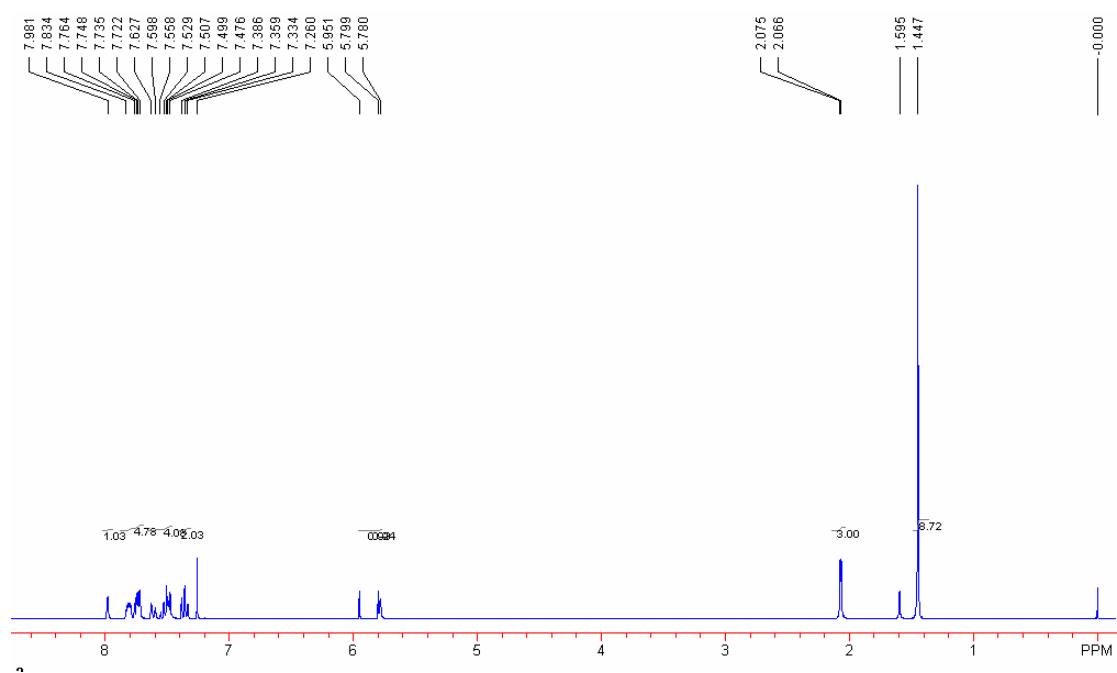

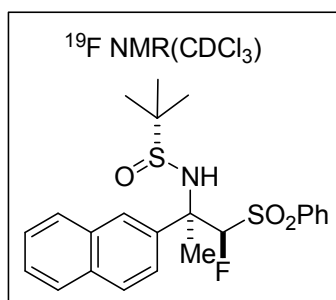

**4g'**

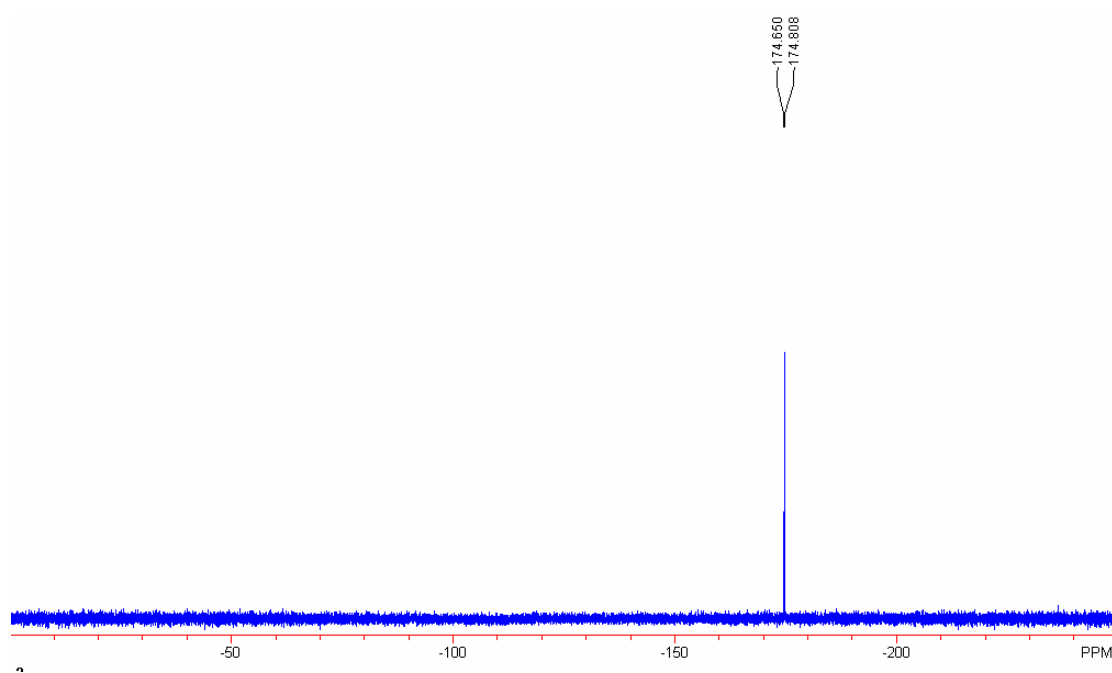

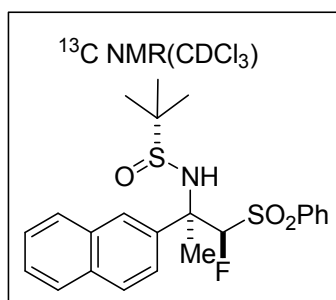

**4g'**

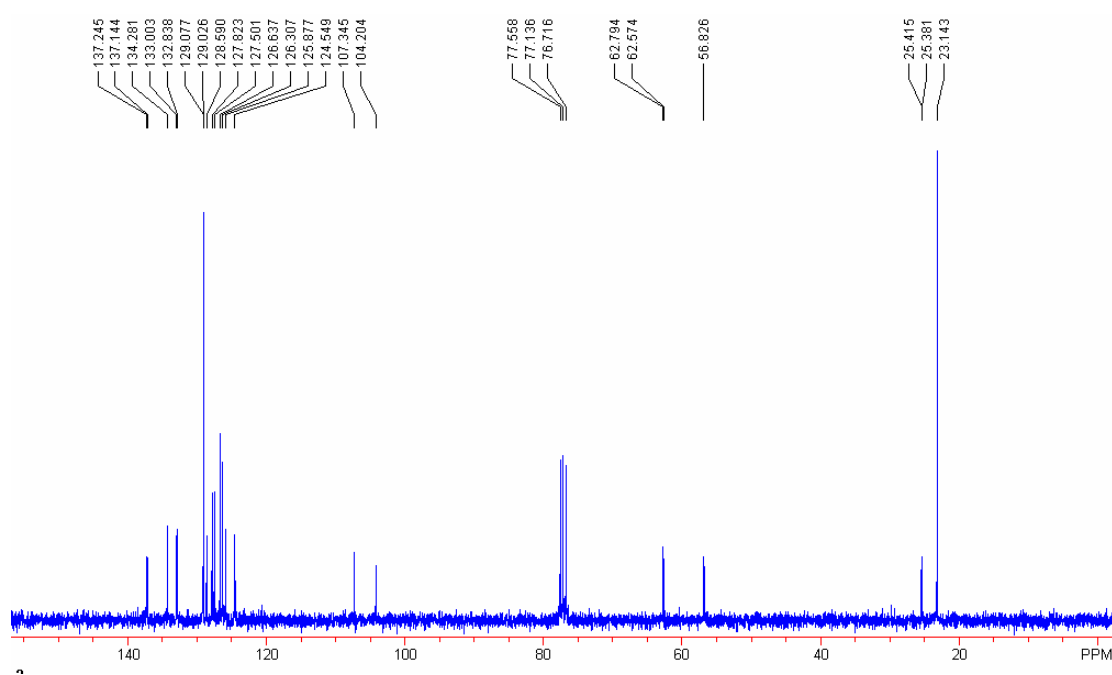

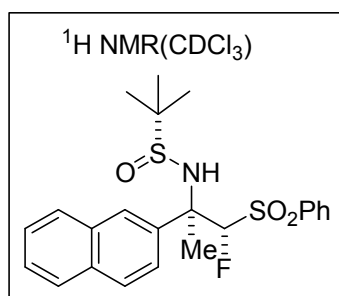

**4g''**

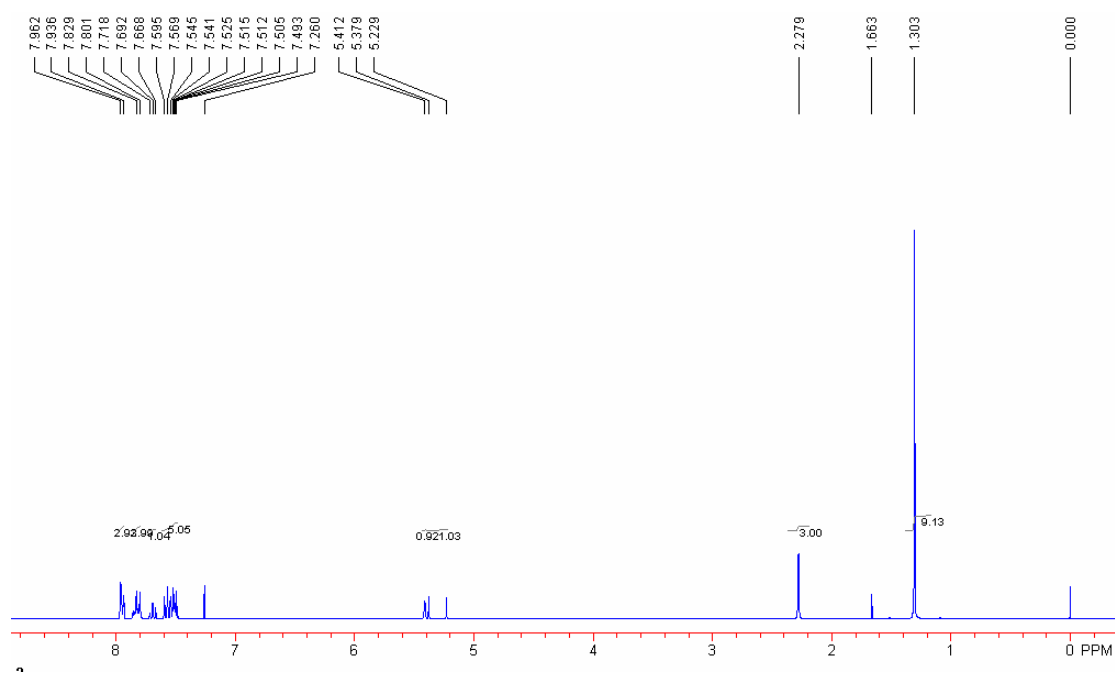

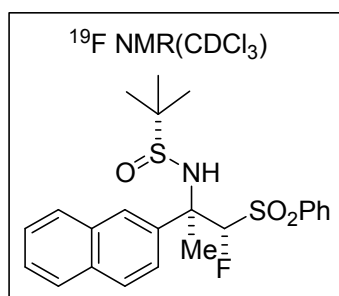

**4g''**

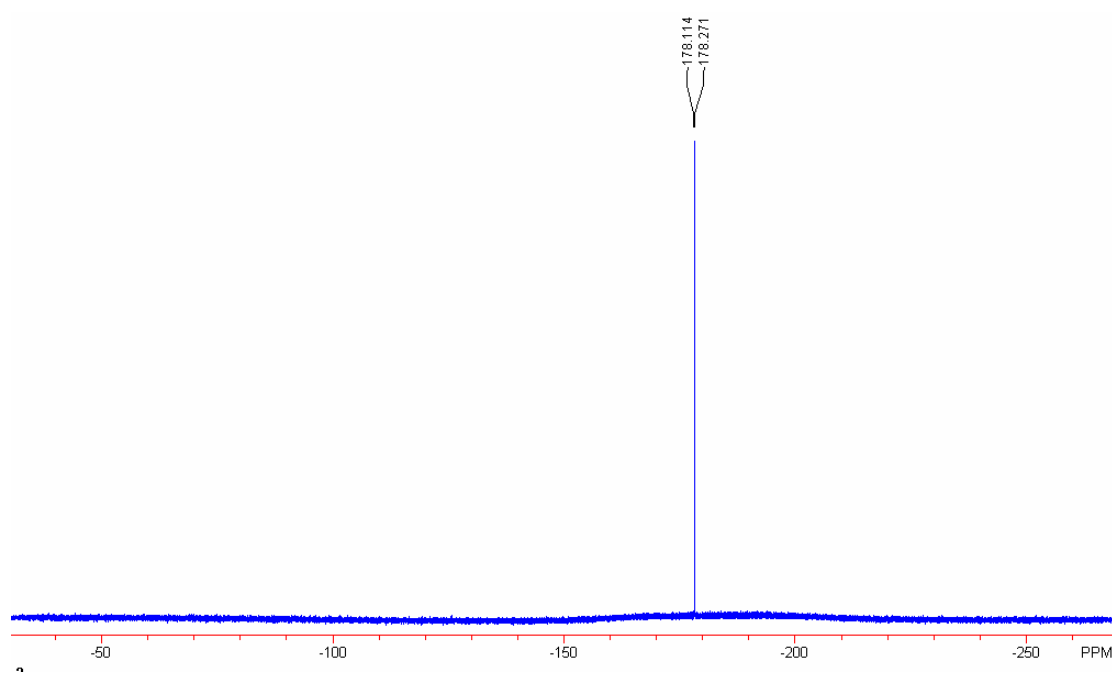

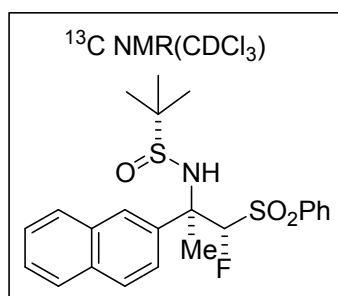

**4g''**

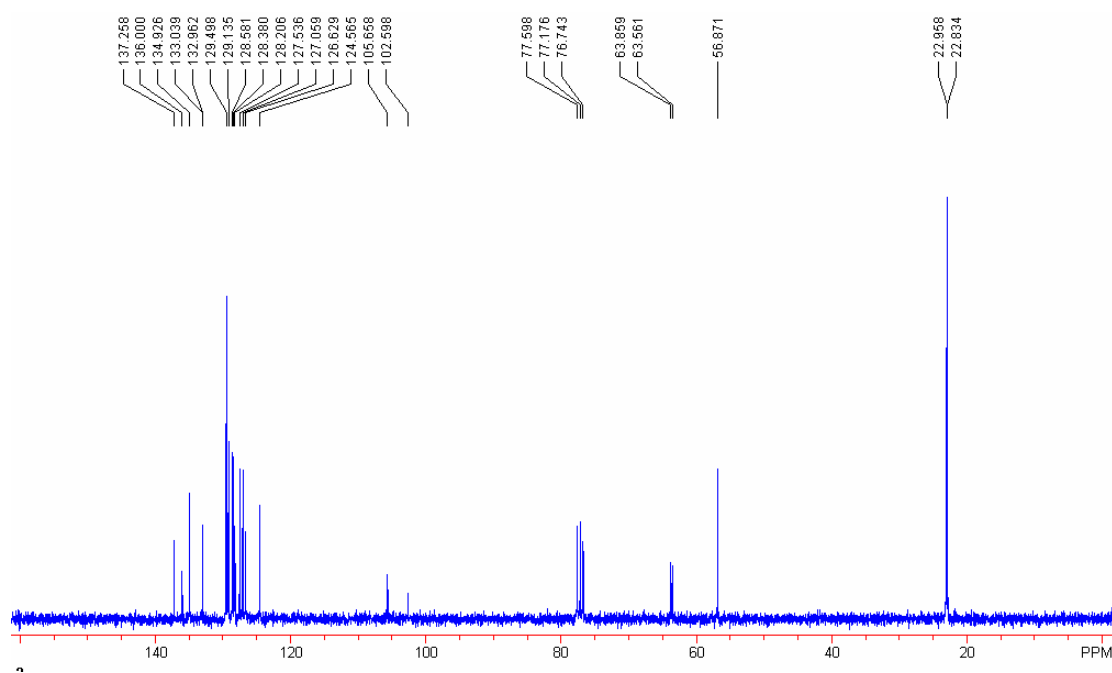



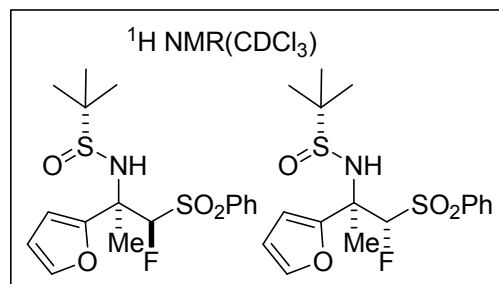

4h'+4h''

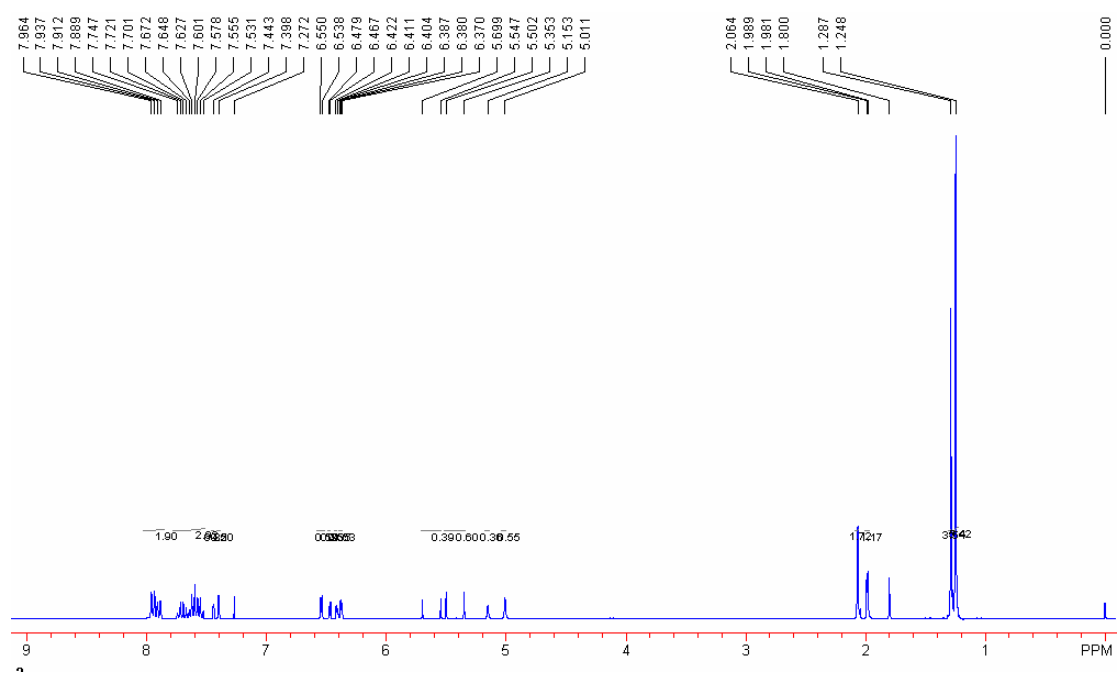

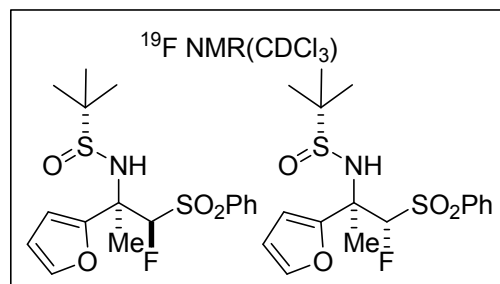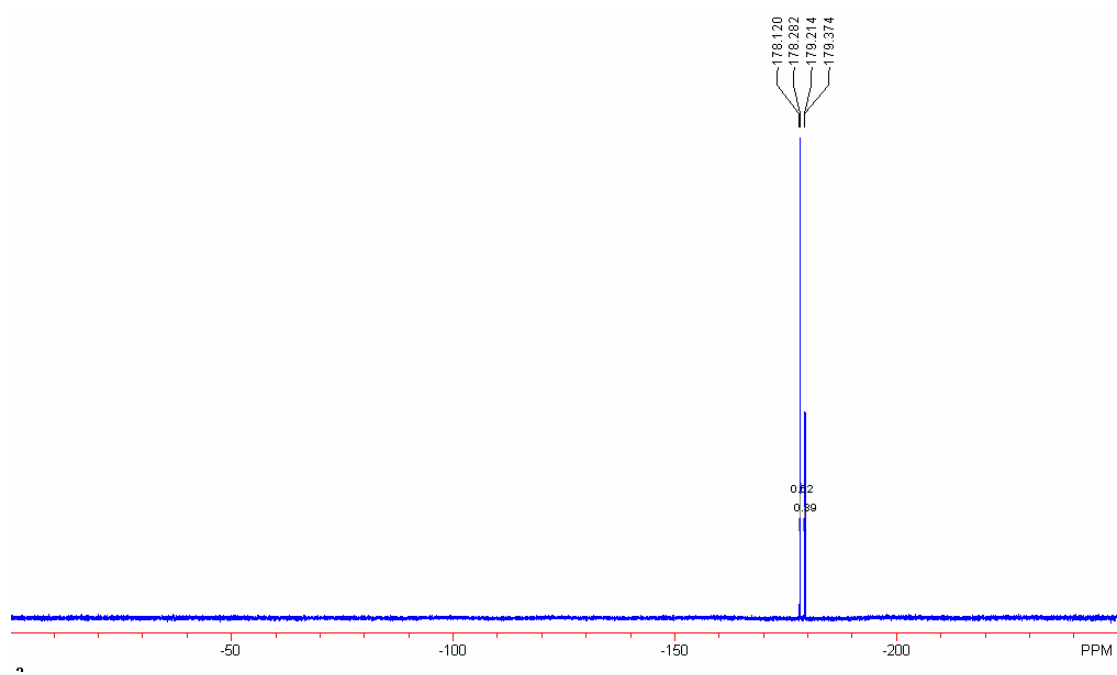

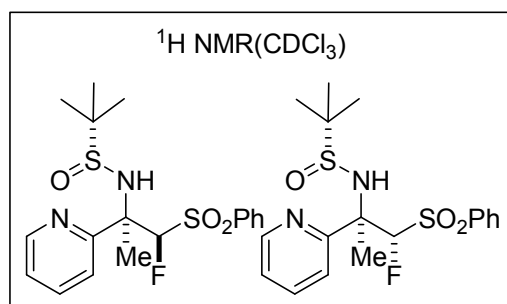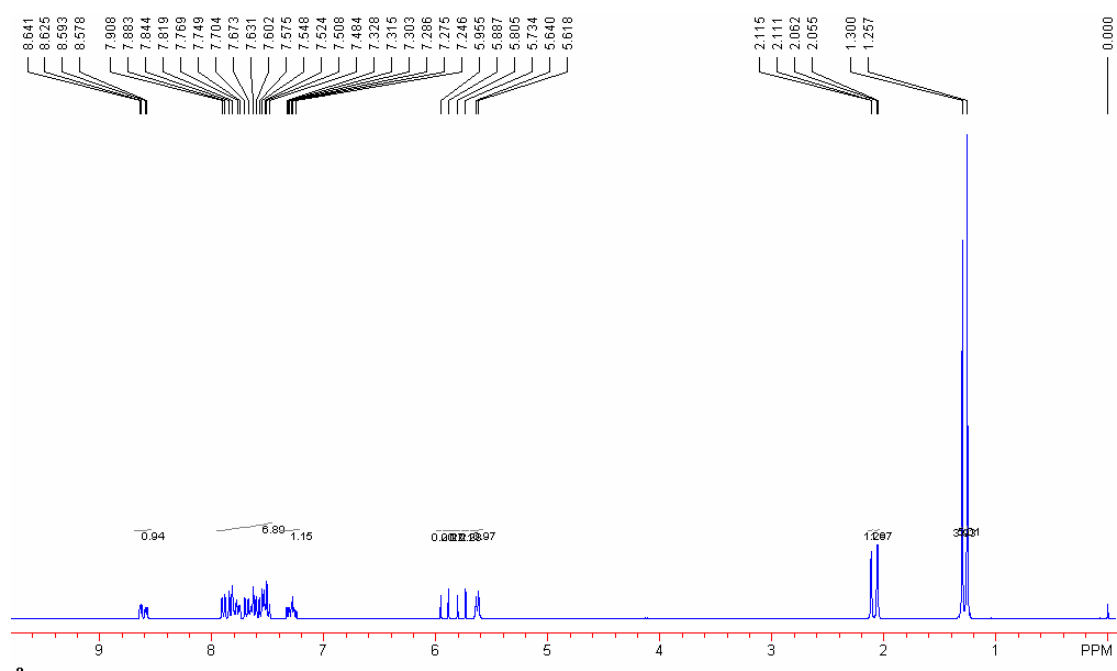

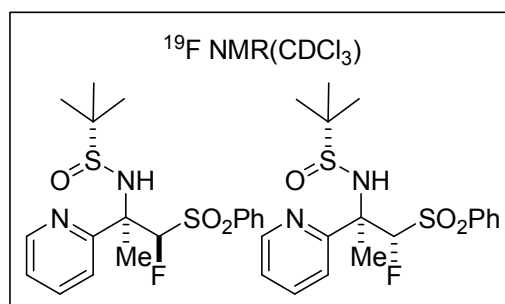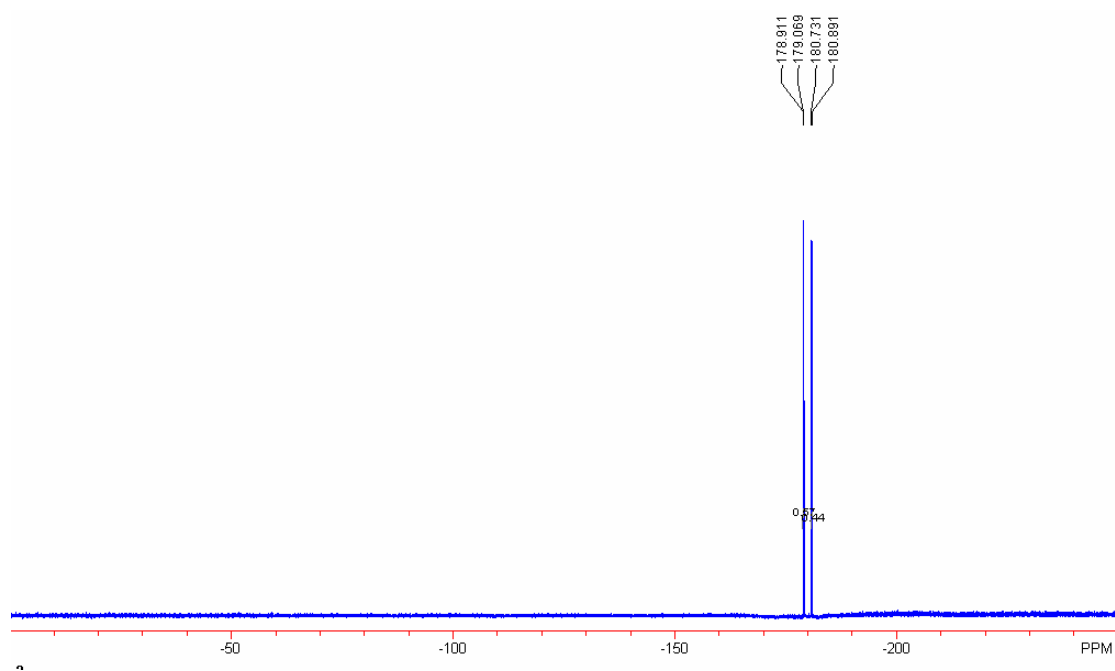

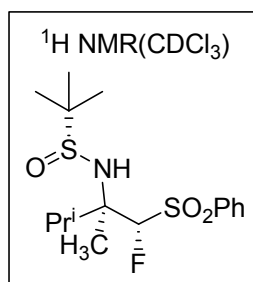

4j

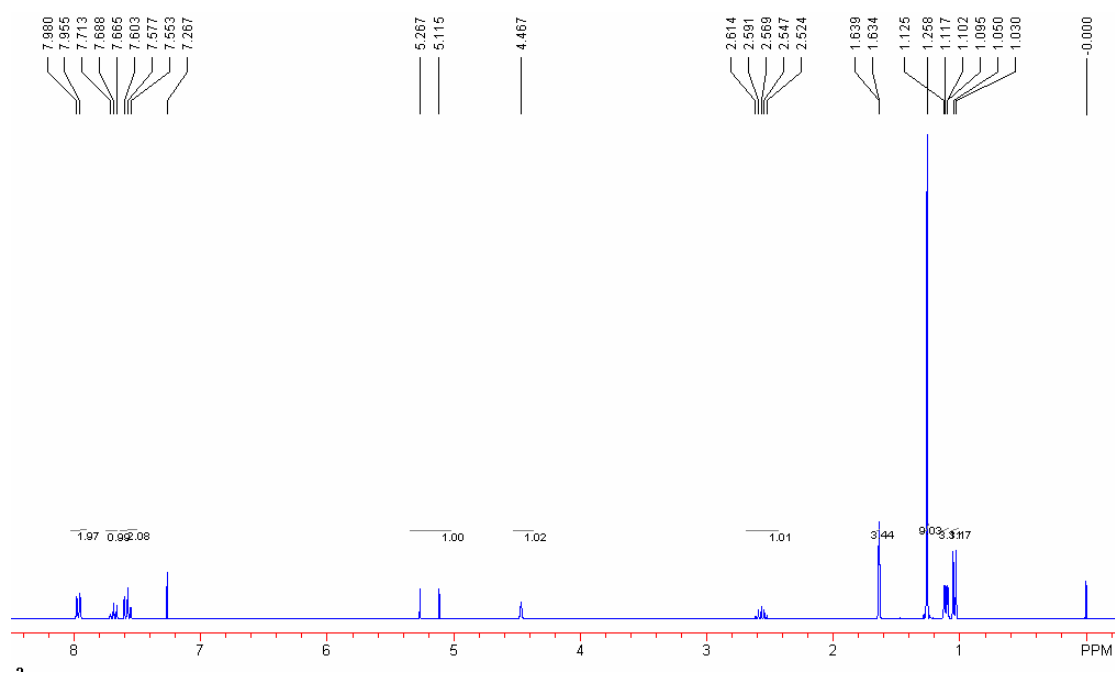

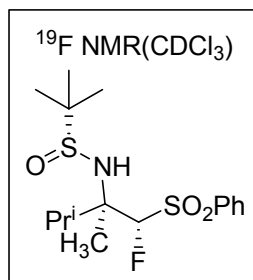

**4j''**

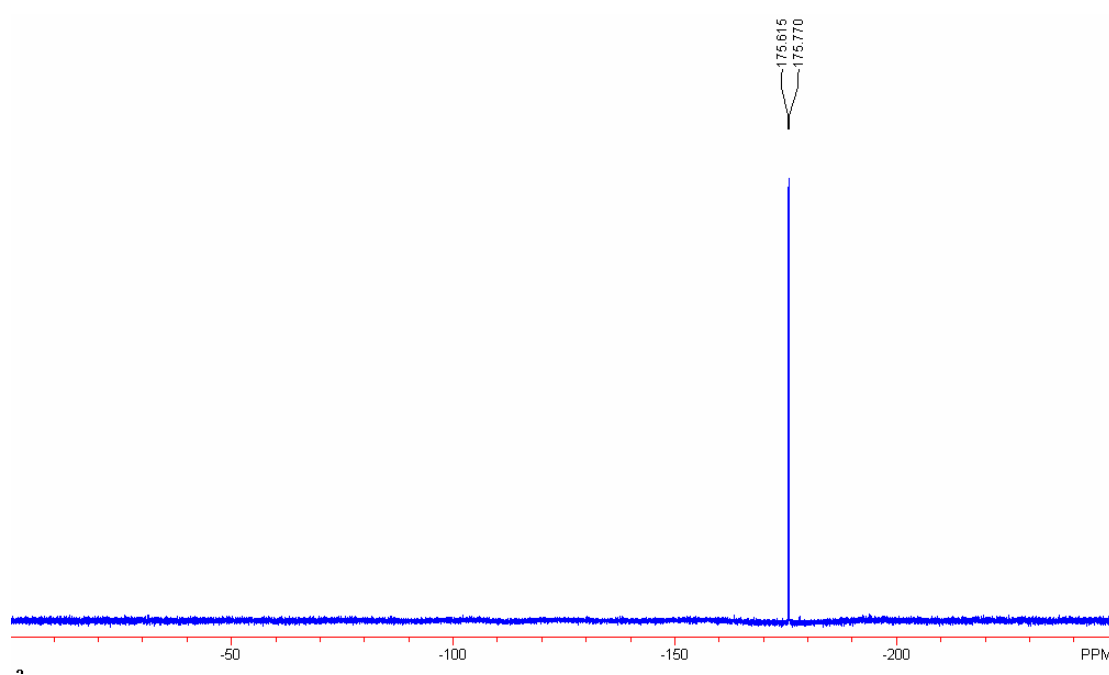

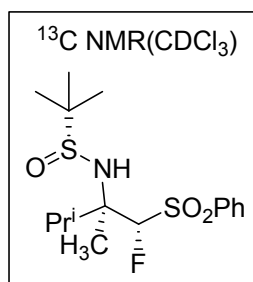

4j

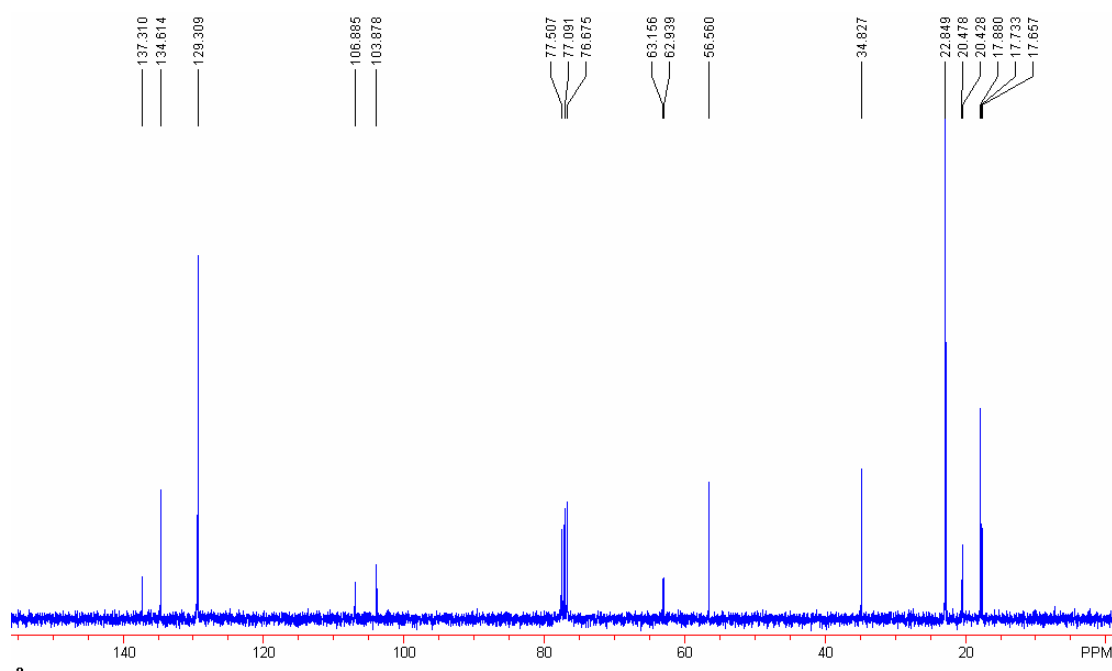

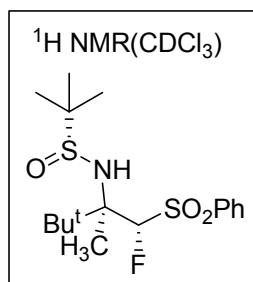

4k"

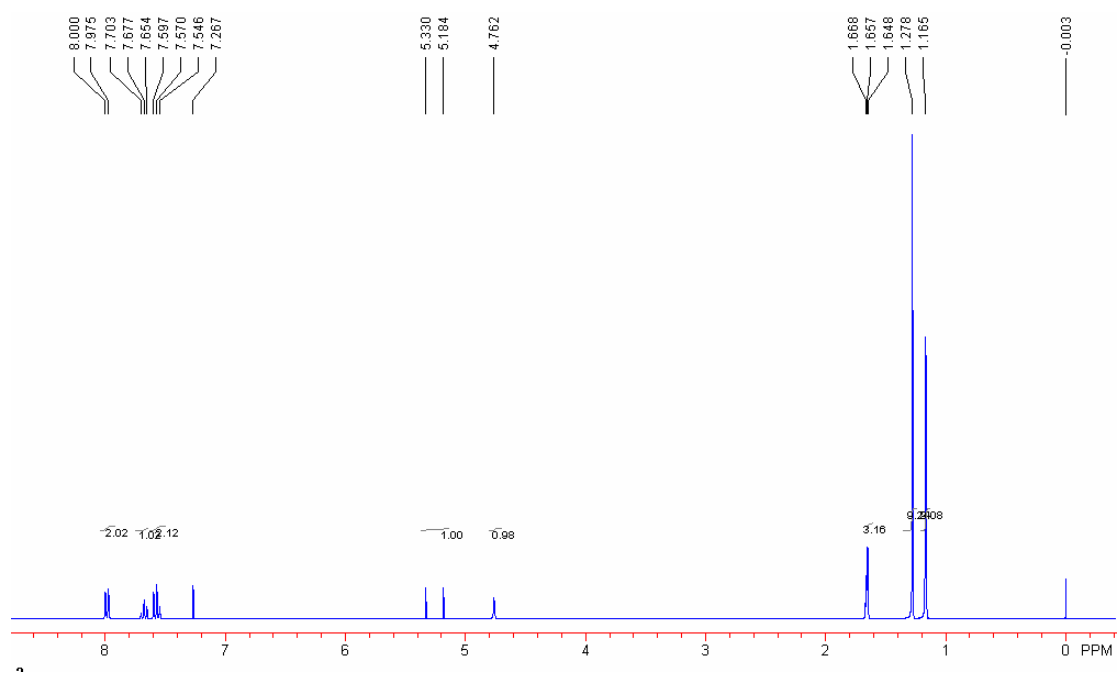



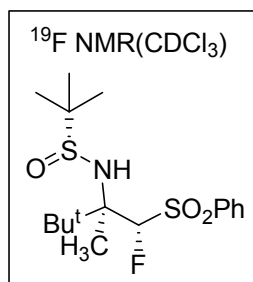

**4k''**

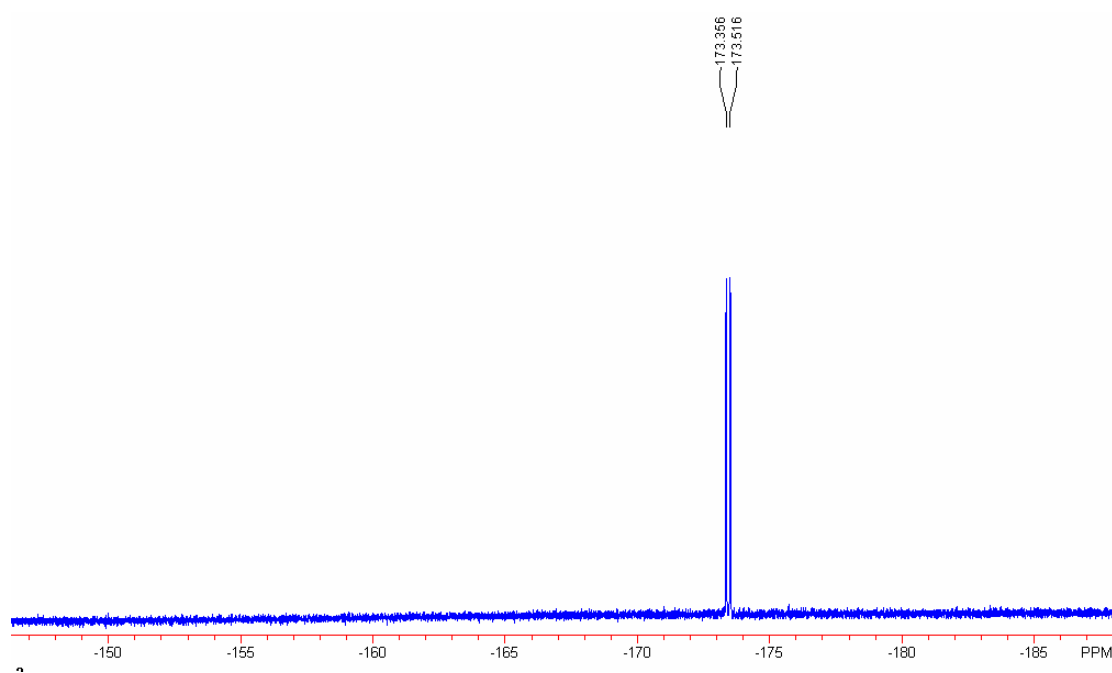

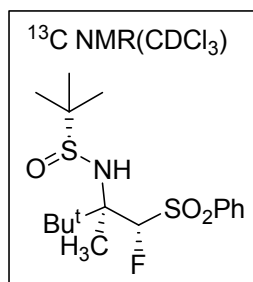

**4k''**

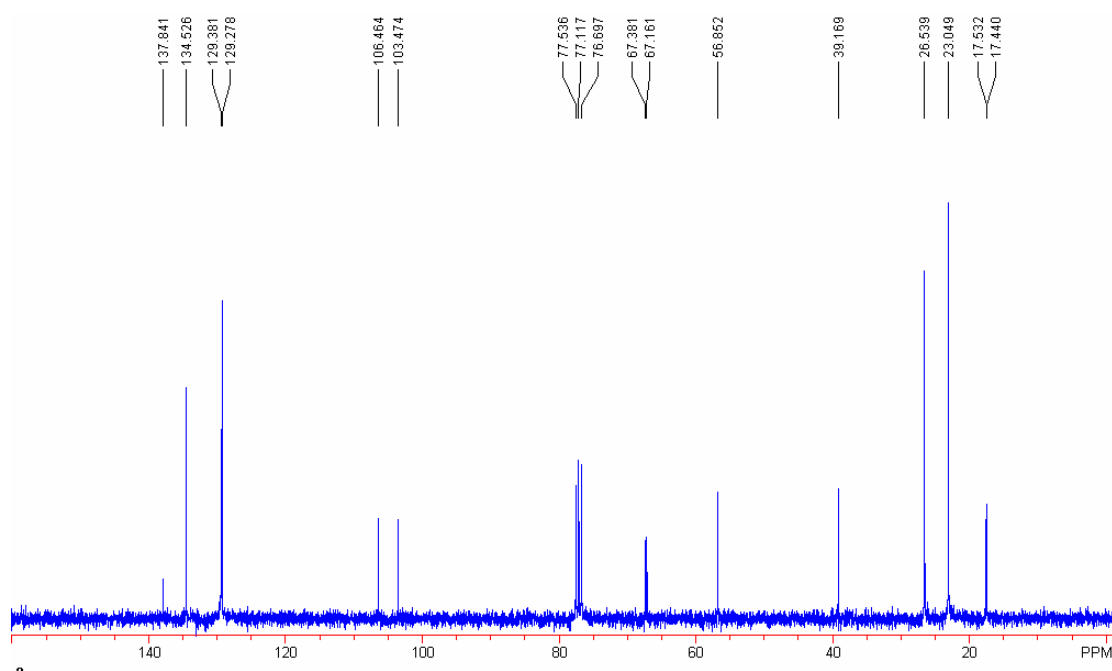

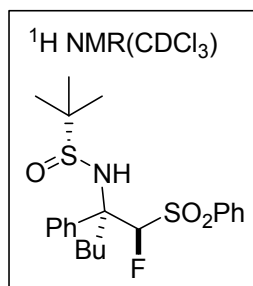

4I'

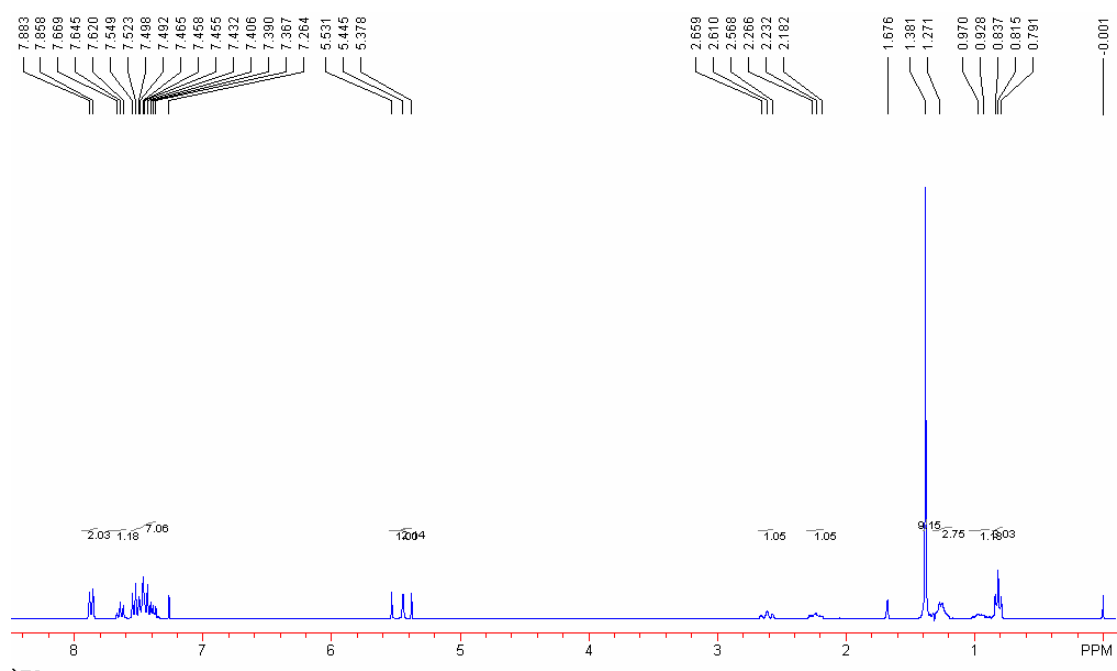

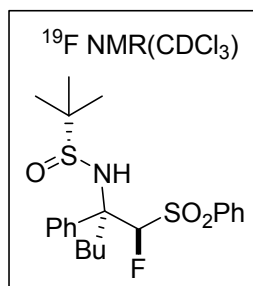

4I'

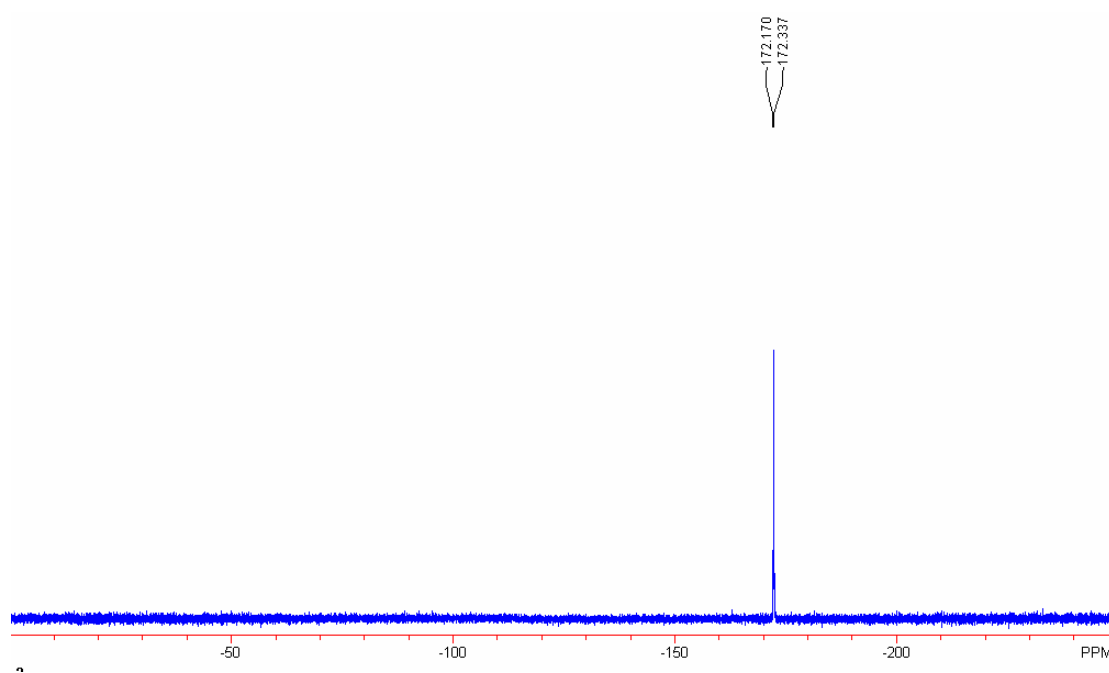

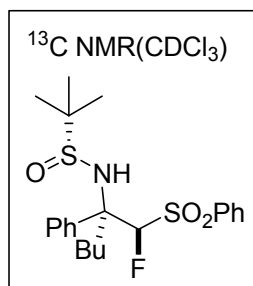

4I'

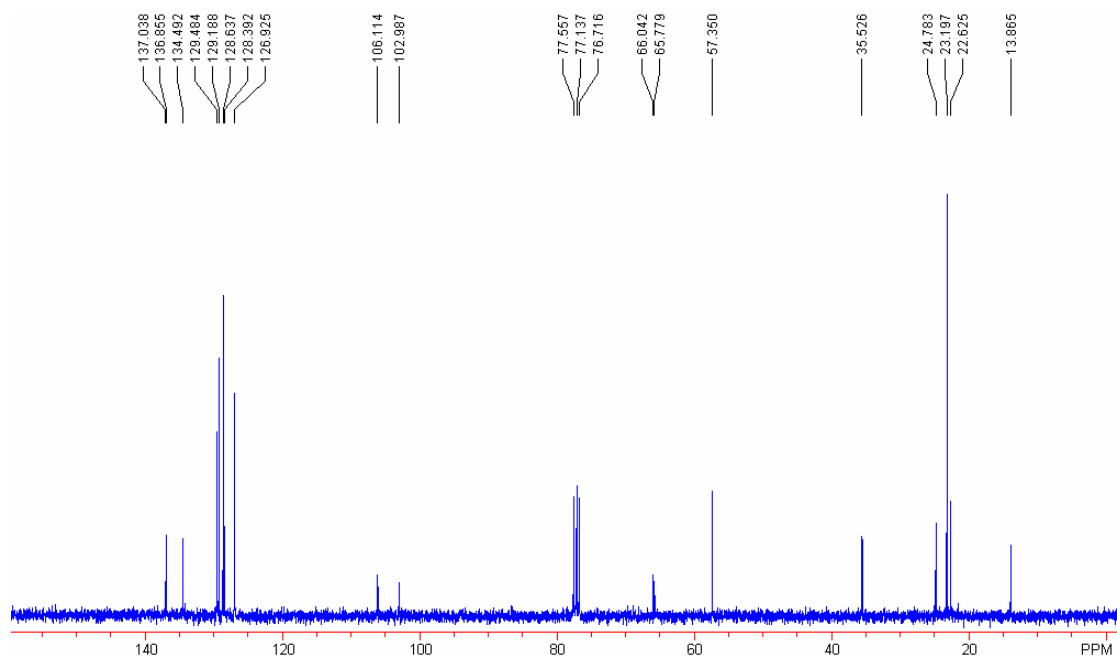

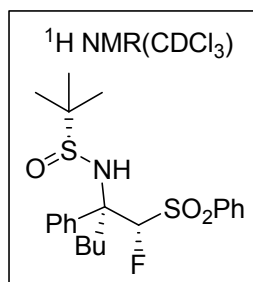

4l''

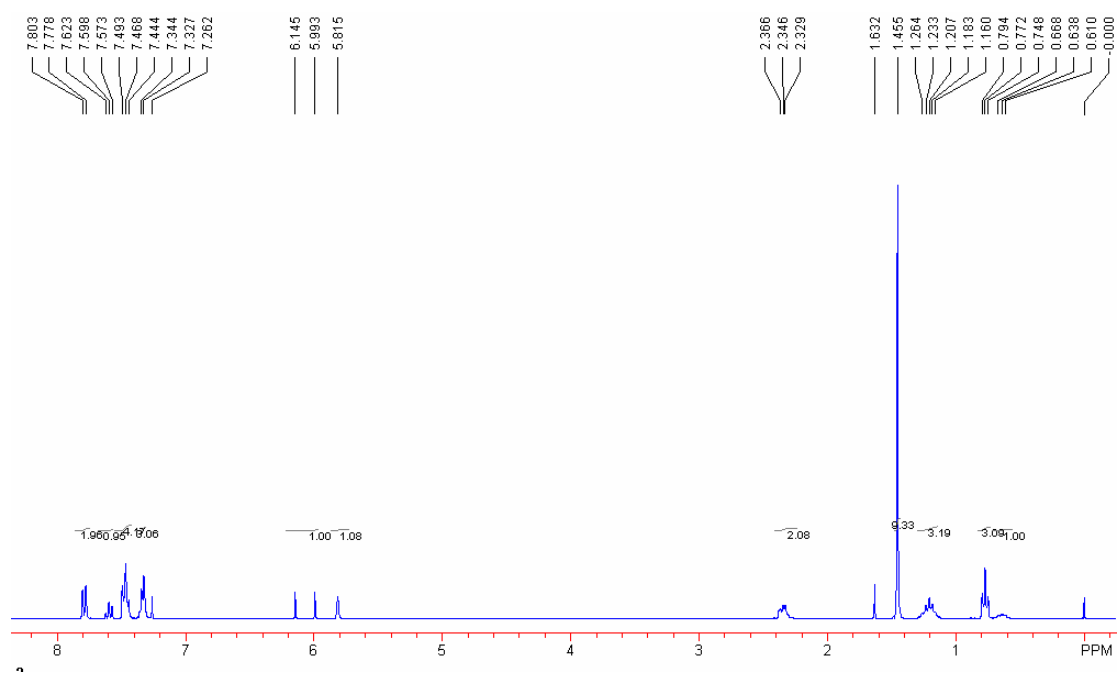

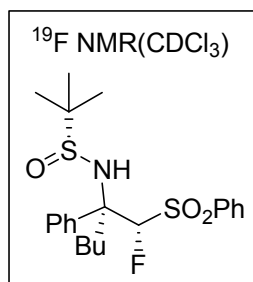

**4l''**

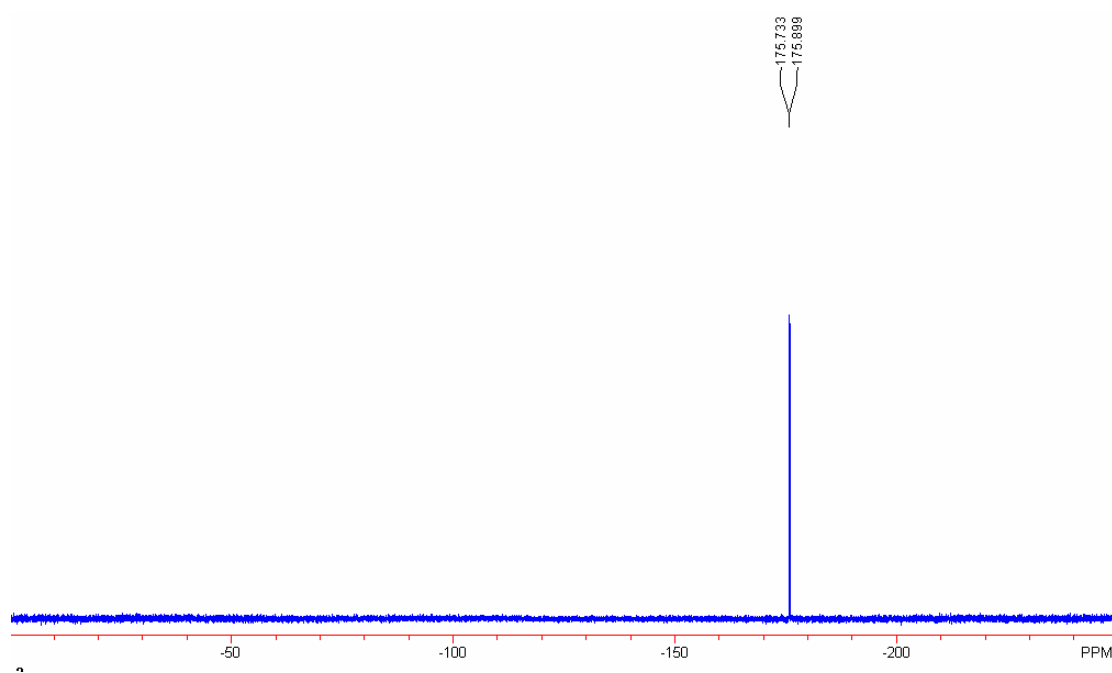

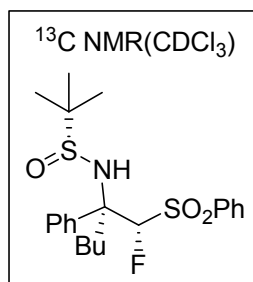

4l''

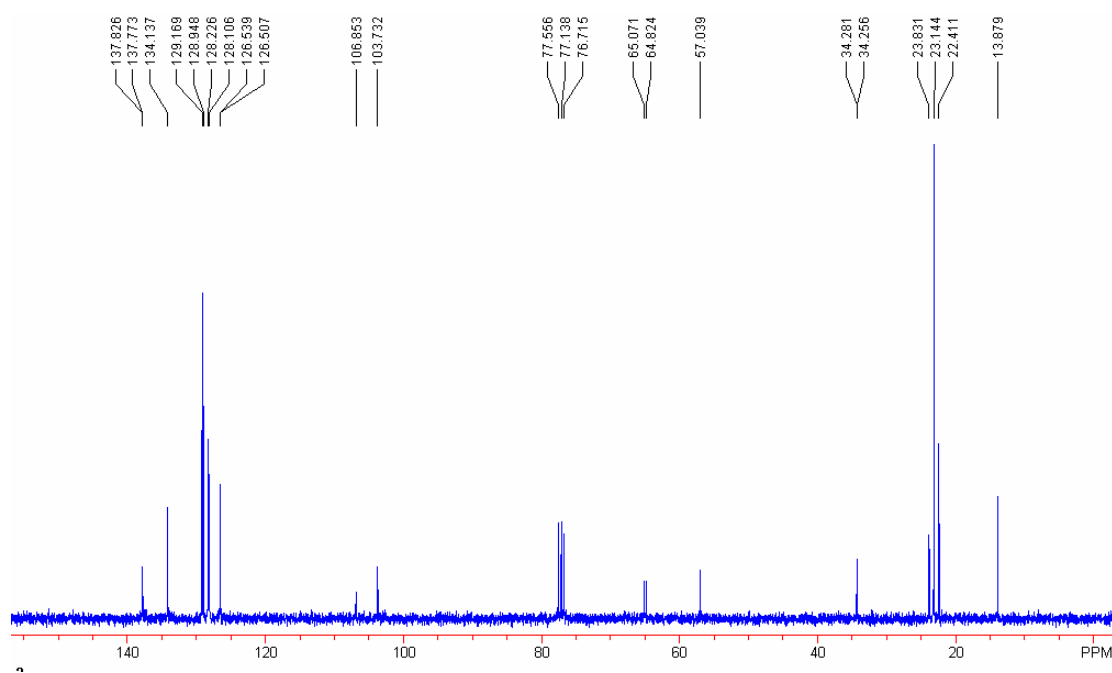



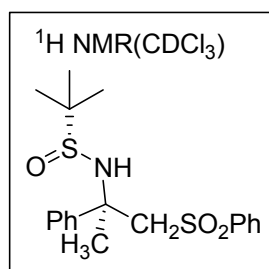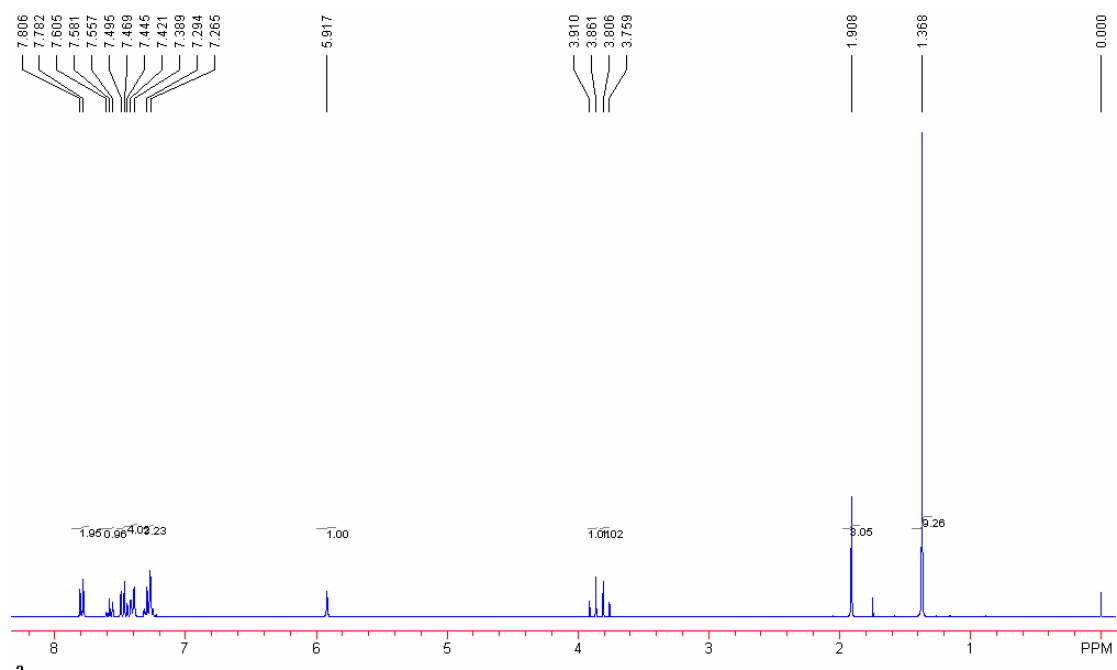

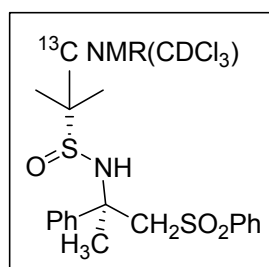

7

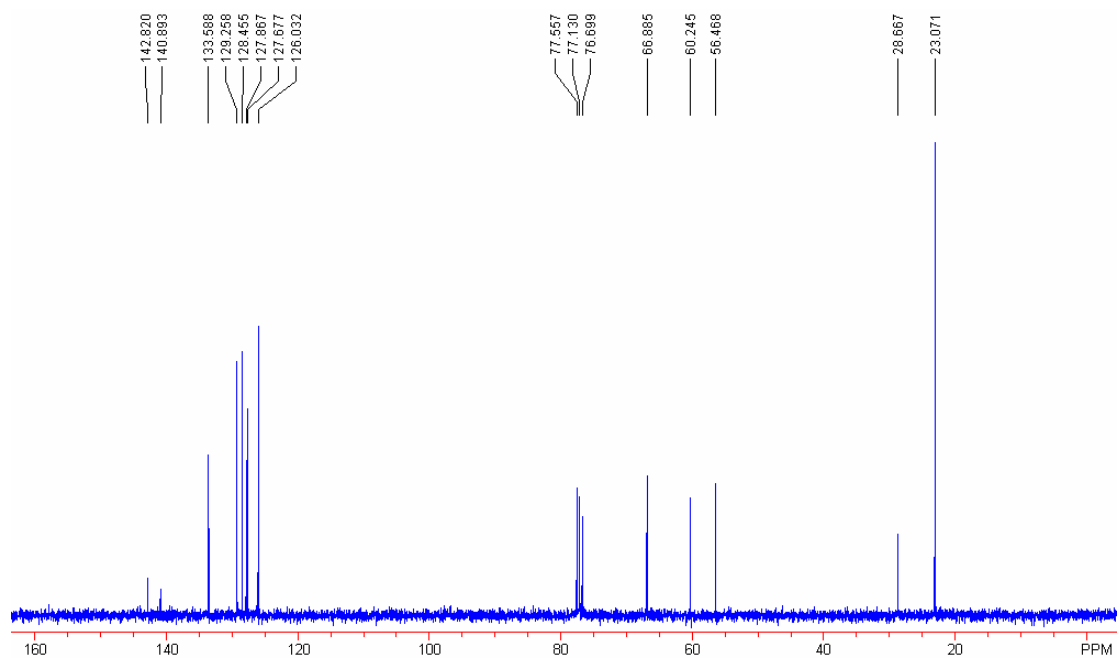

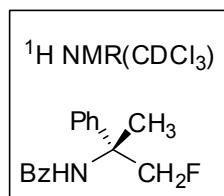

**10**

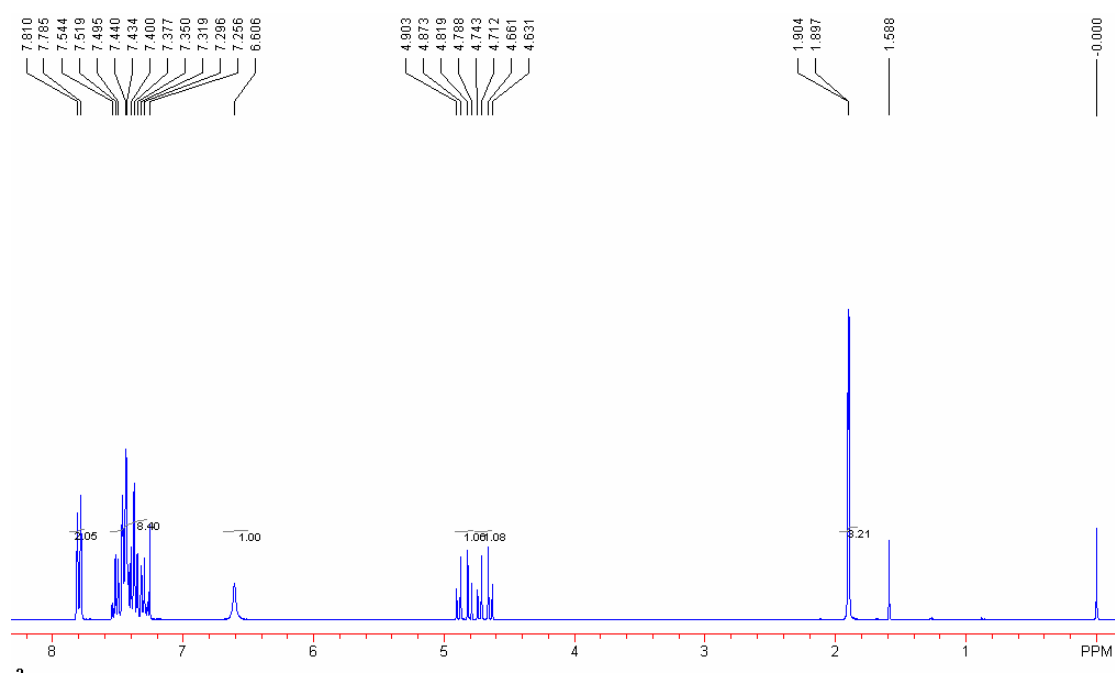

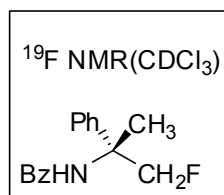

**10**

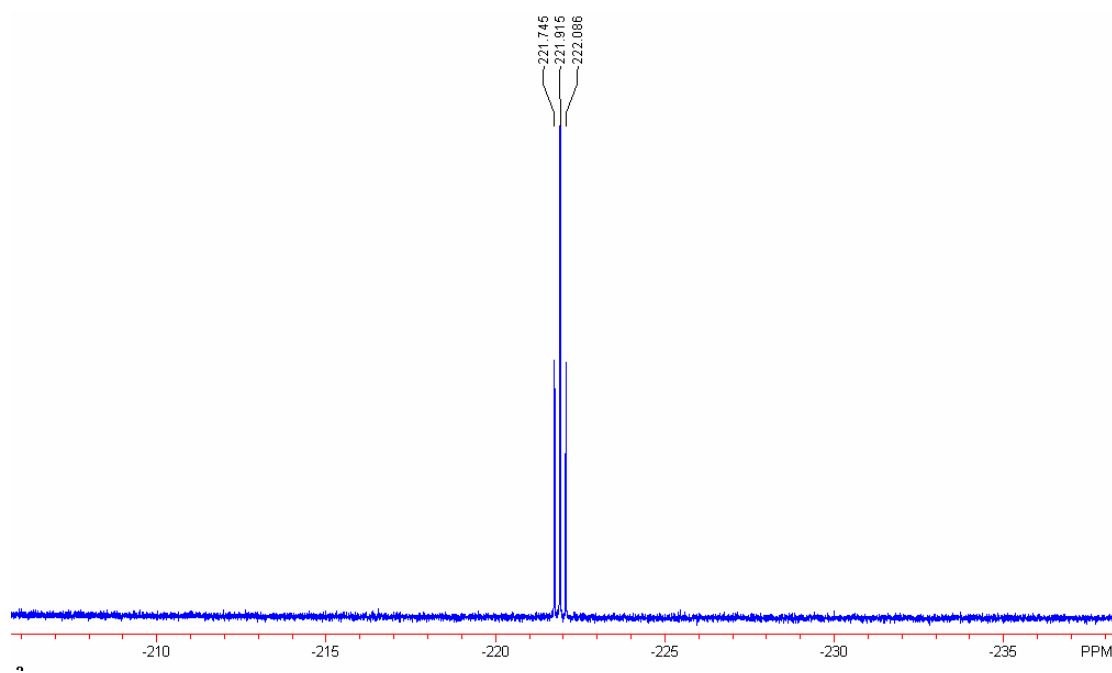

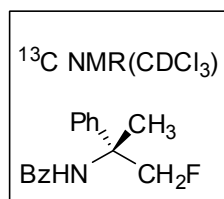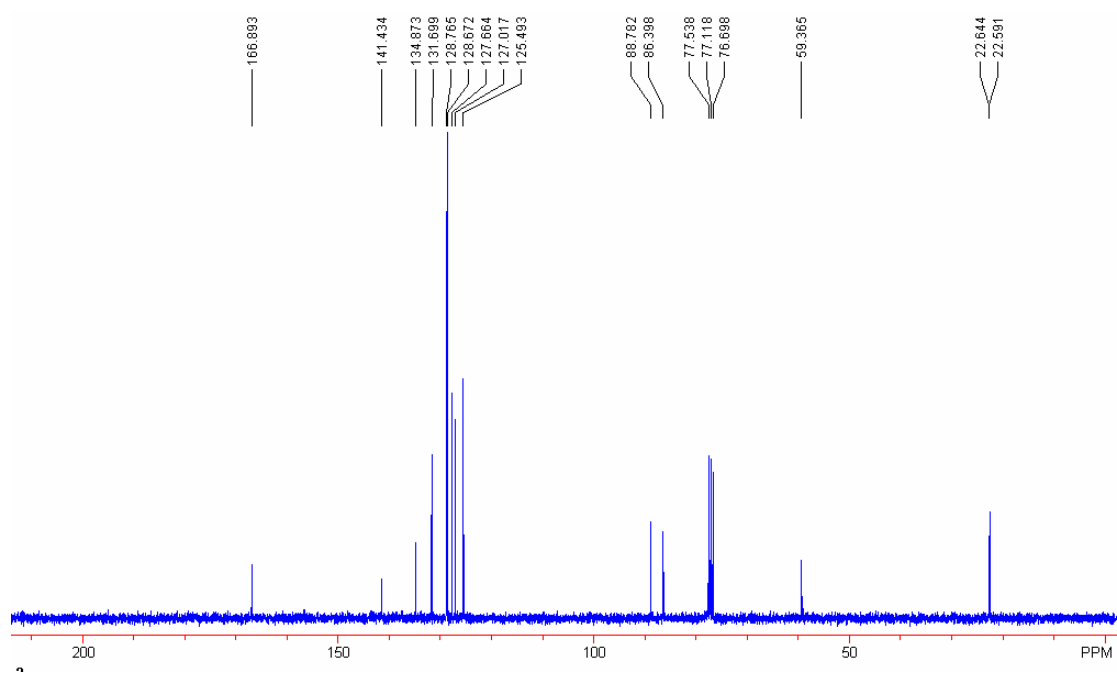

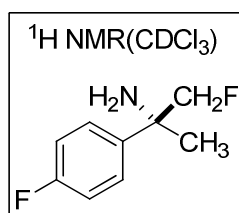

**11b**

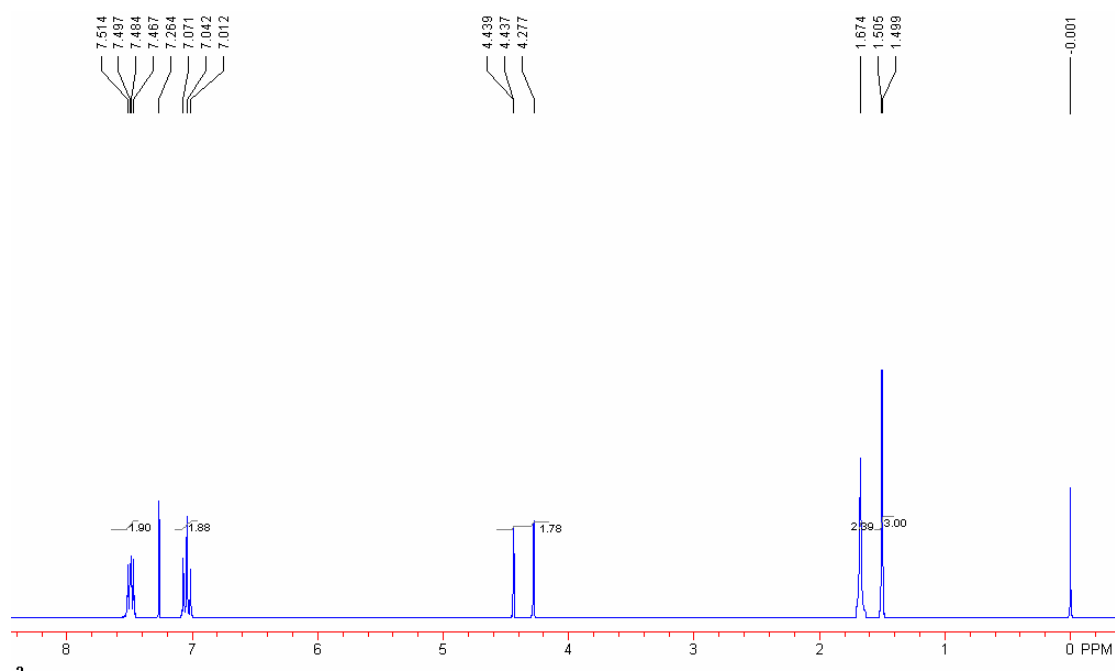

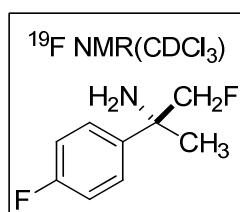

**11b**

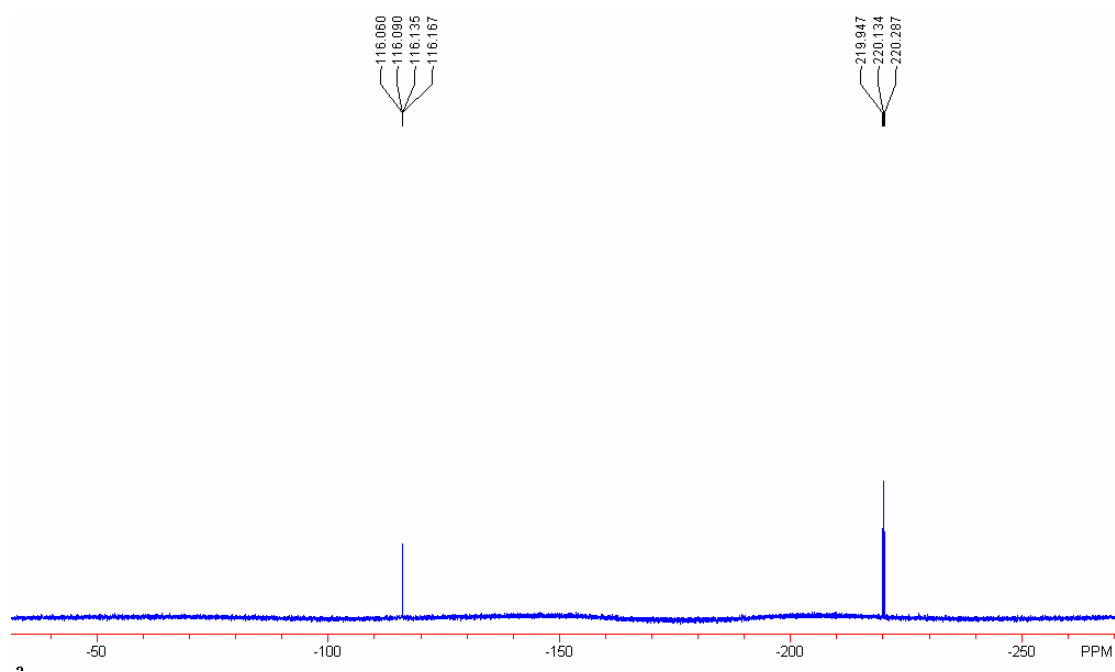

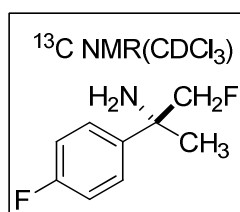

**11b**

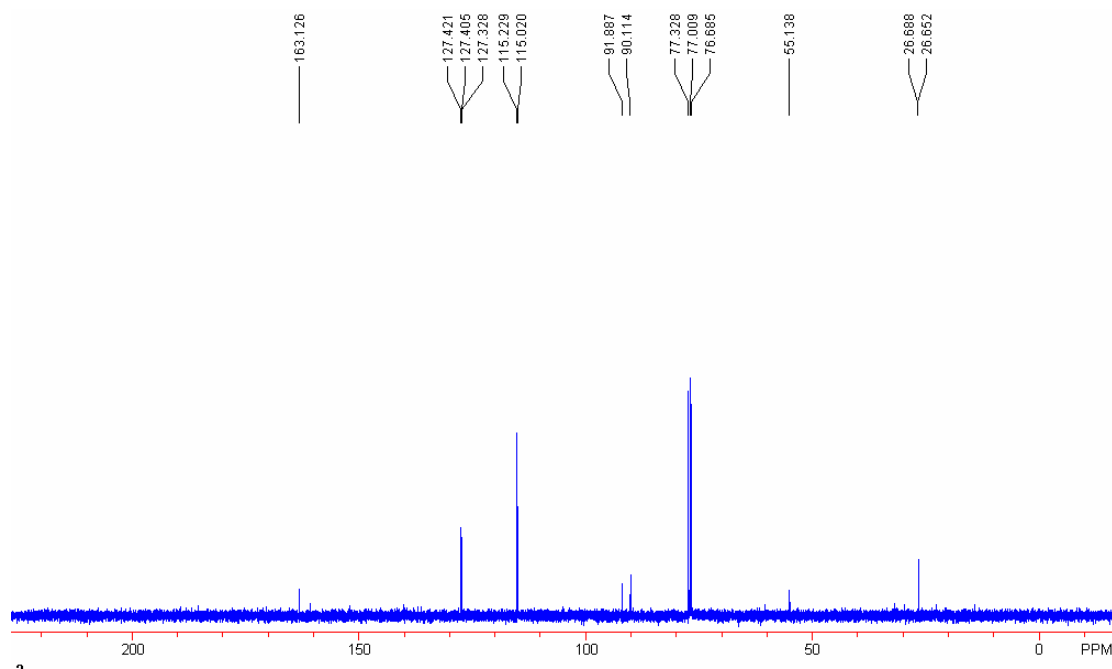



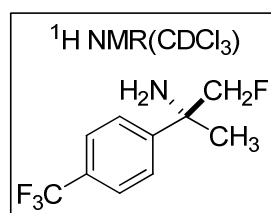

**11c**

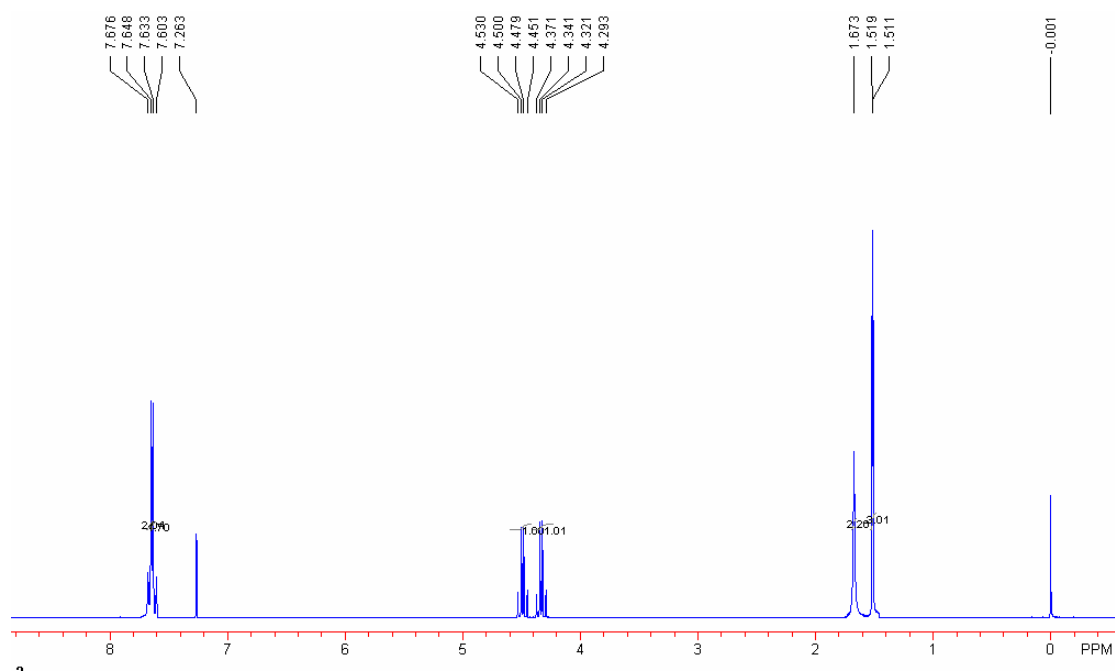

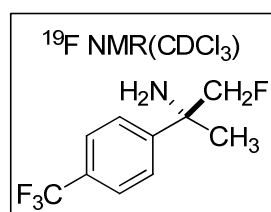

**11c**

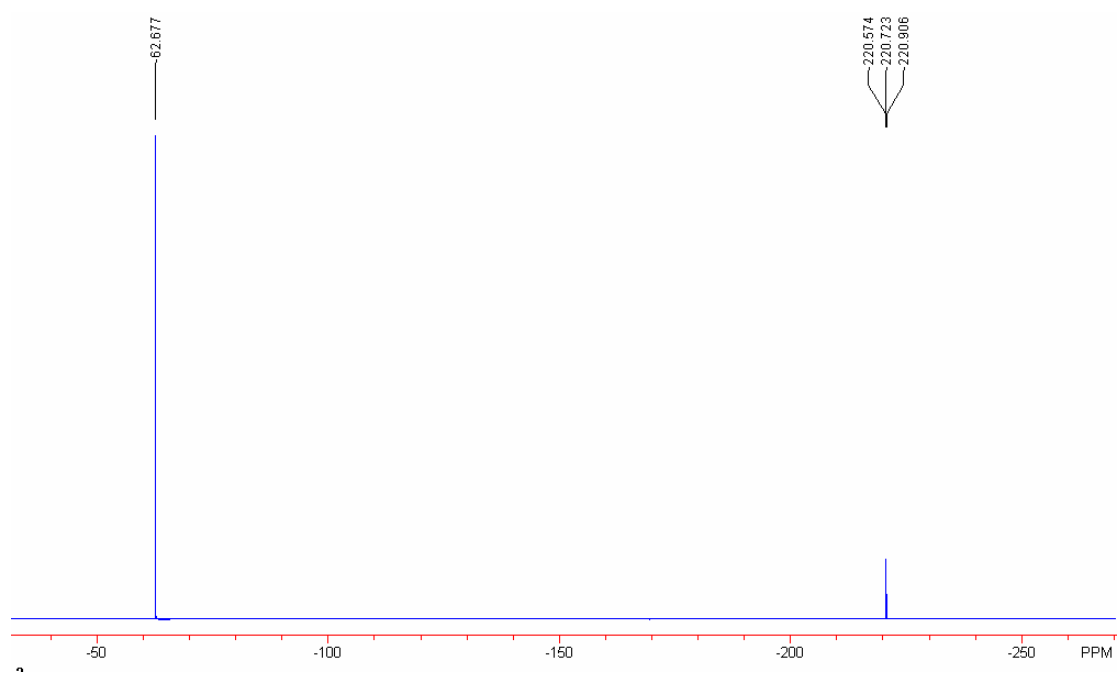

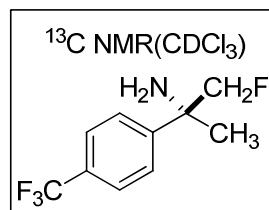

**11c**

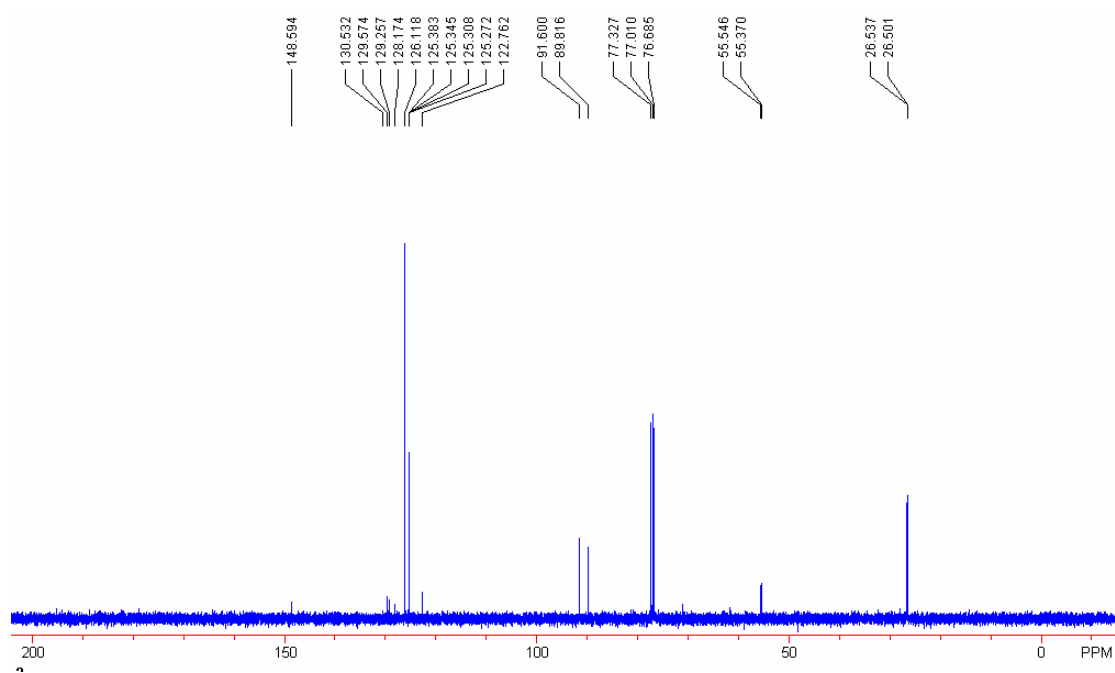

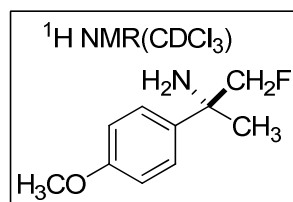

**11d**

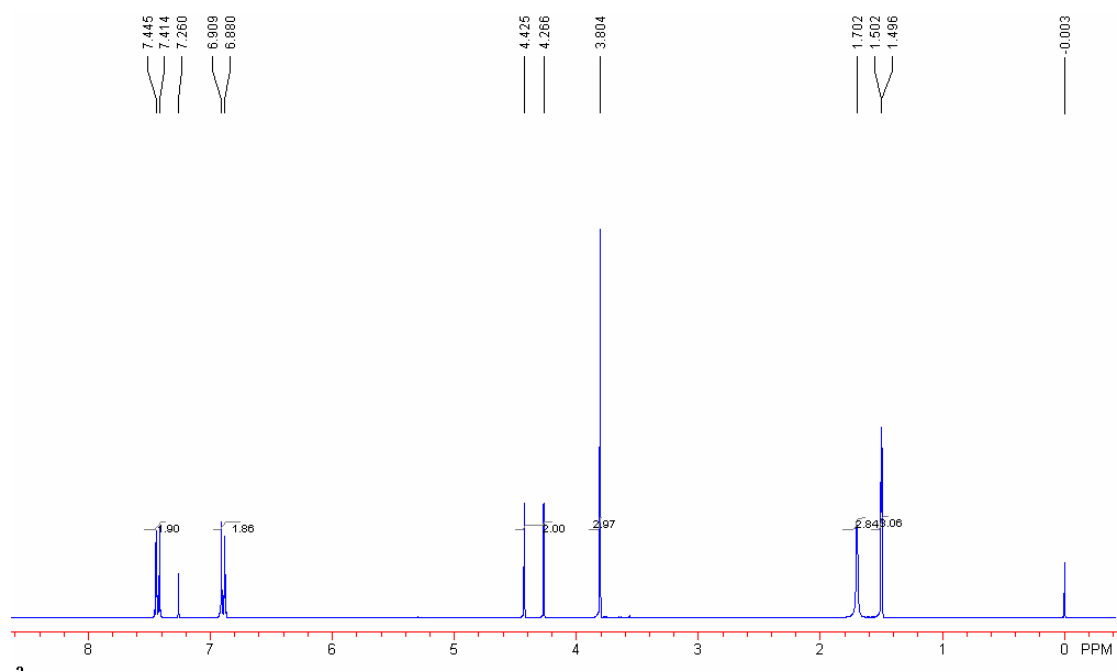

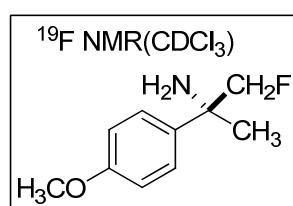

**11d**

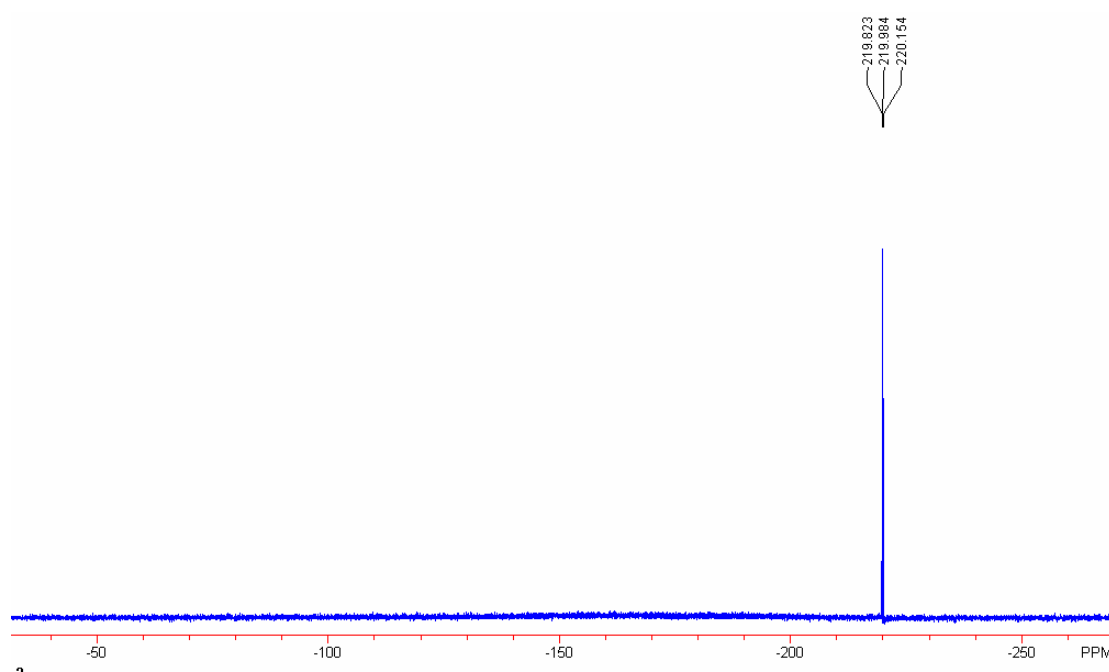

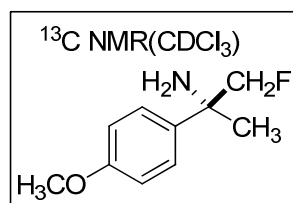

**11d**

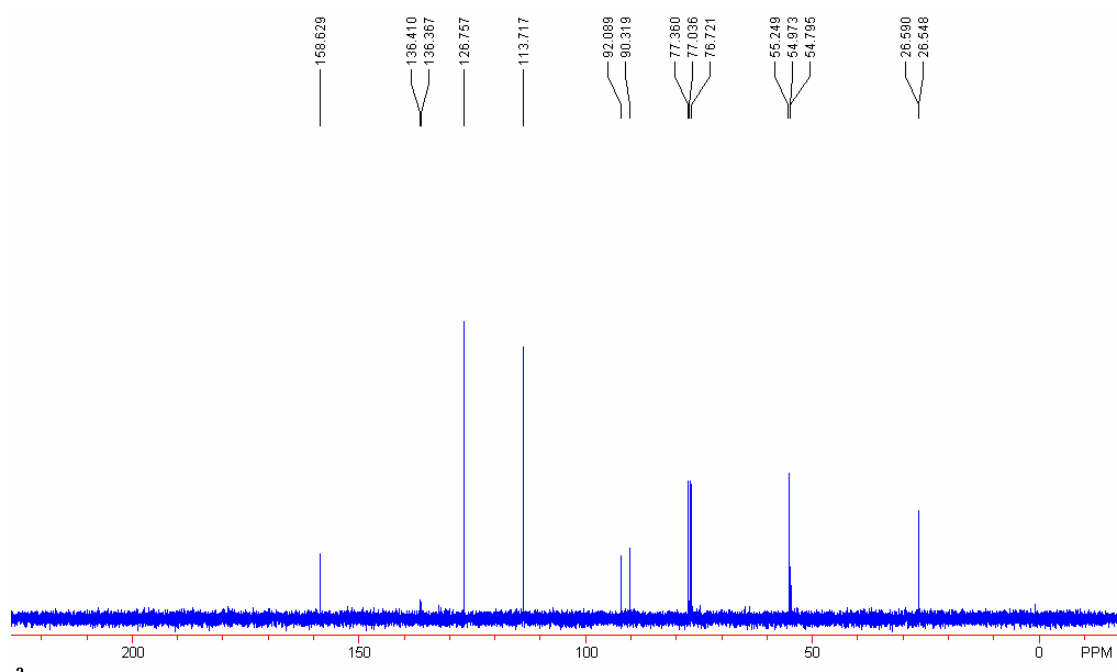

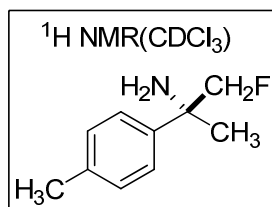

**11e**

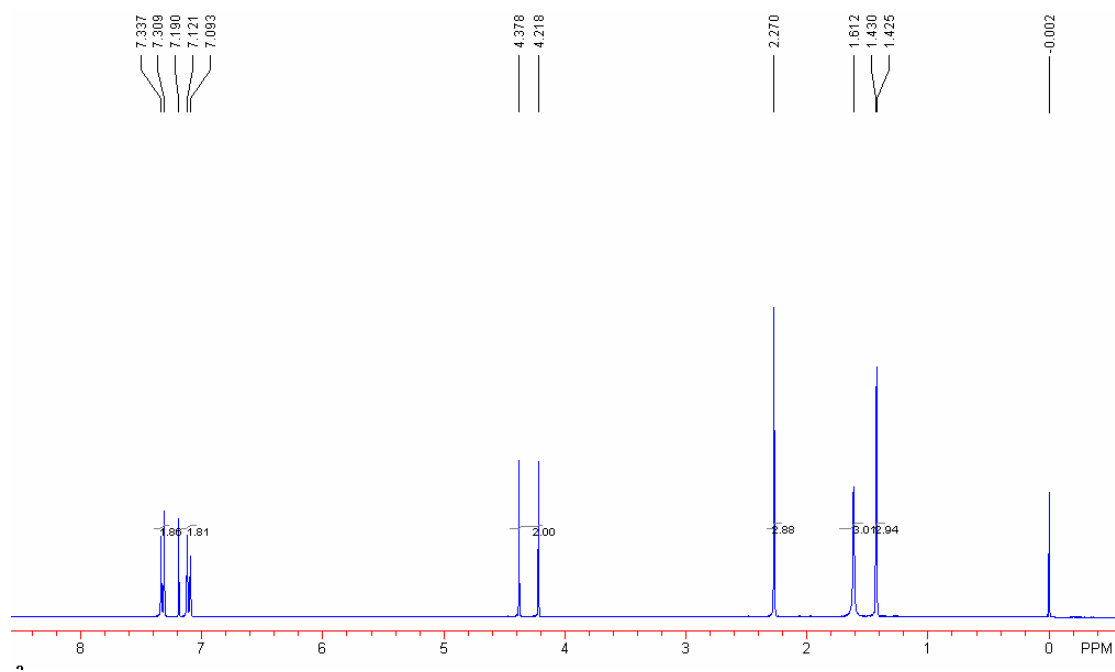

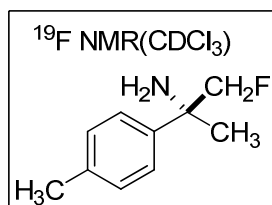

**11e**

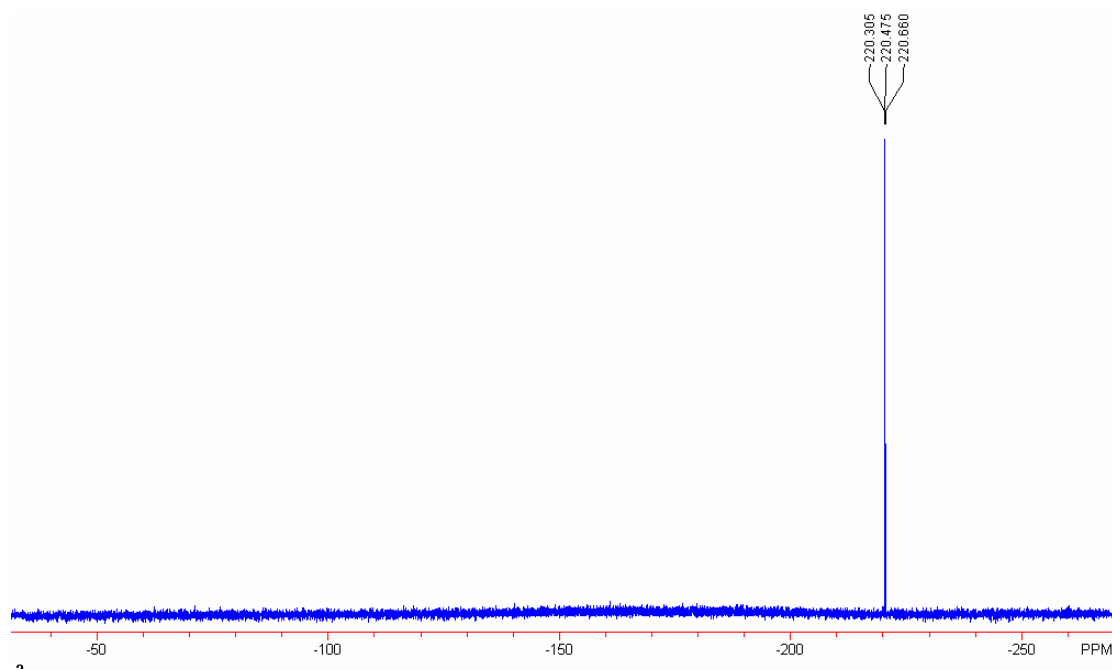



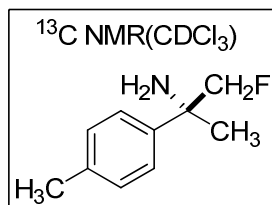

**11e**

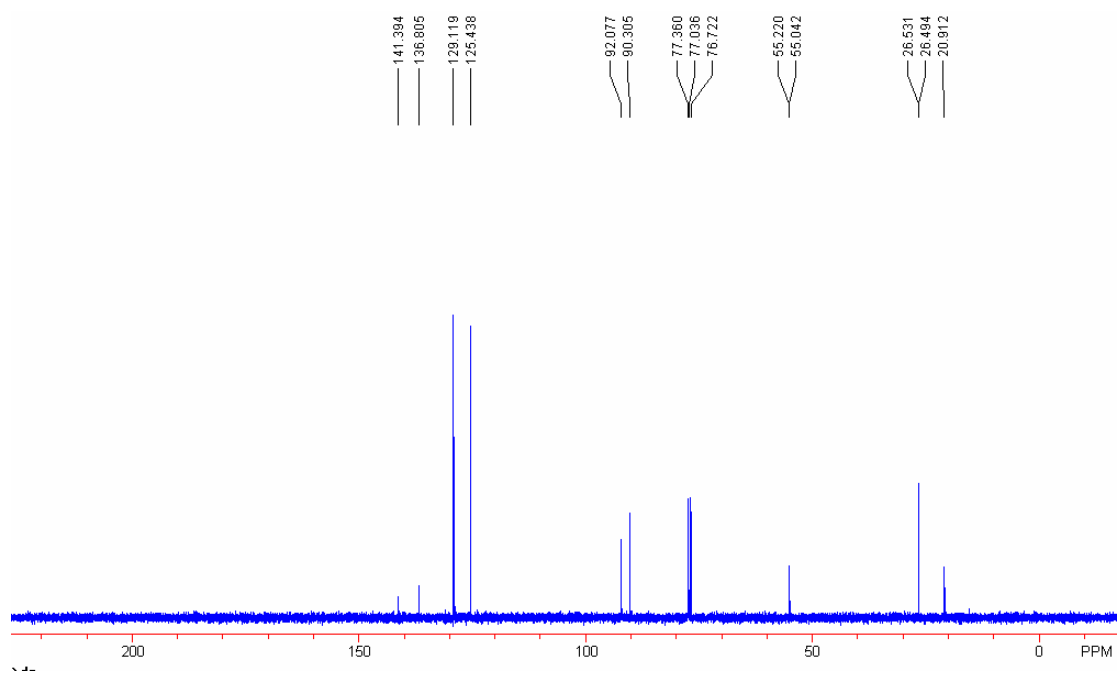

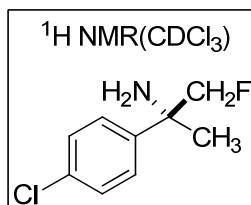

**11f**

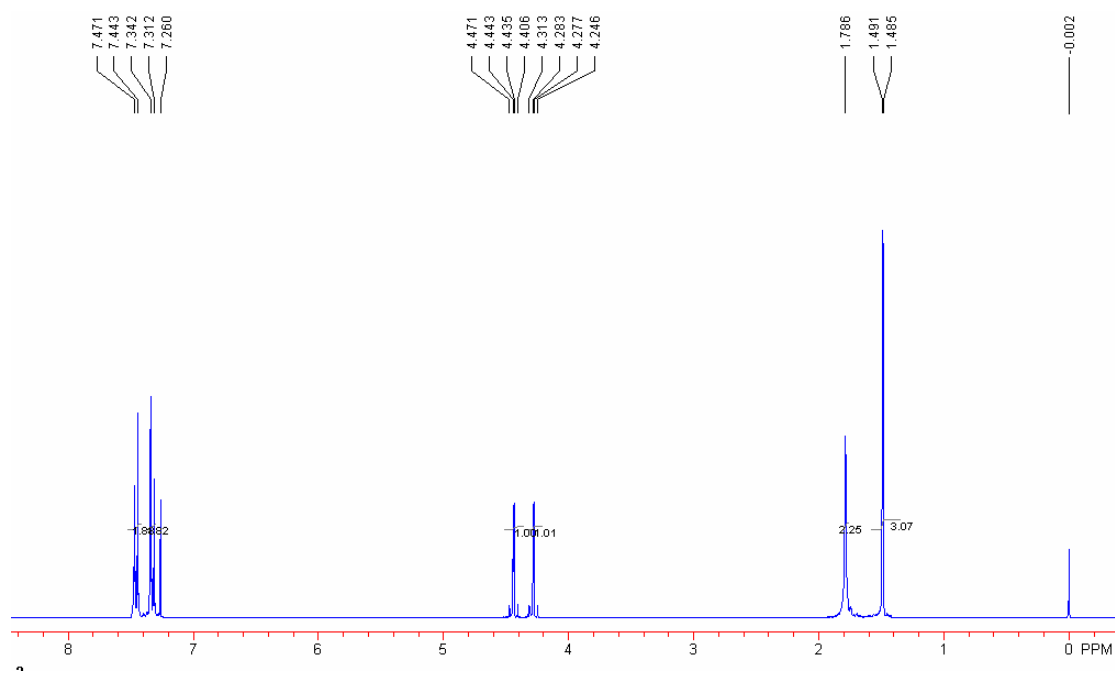

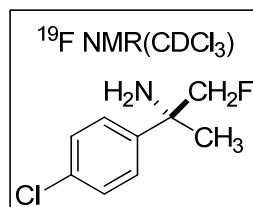

**11f**

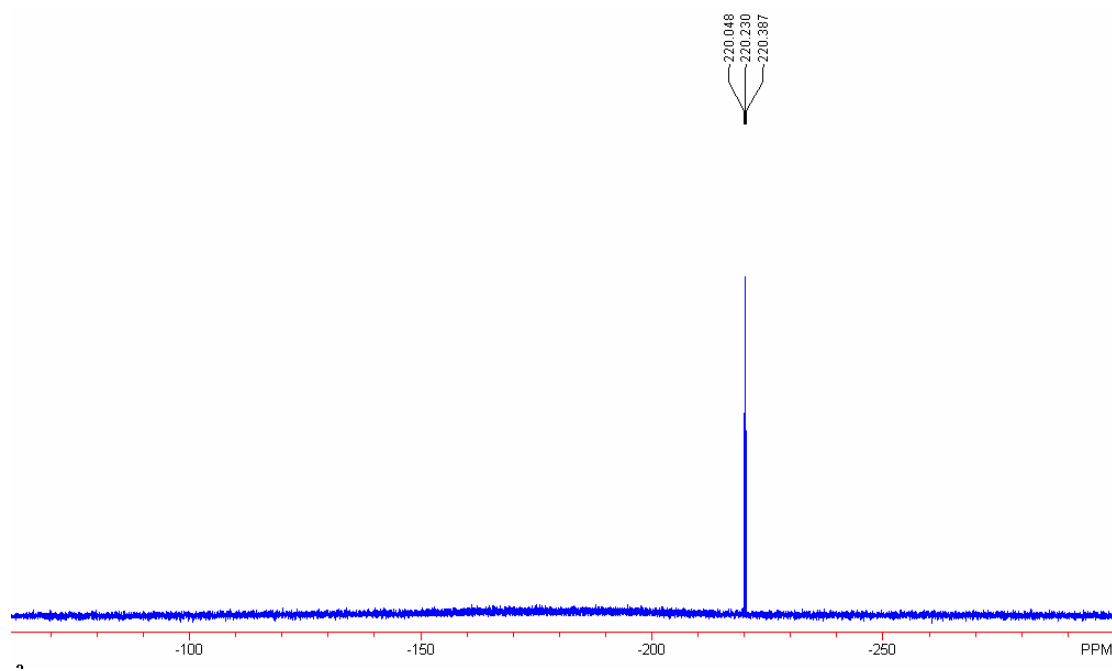

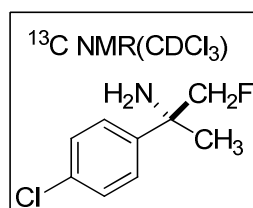

**11f**

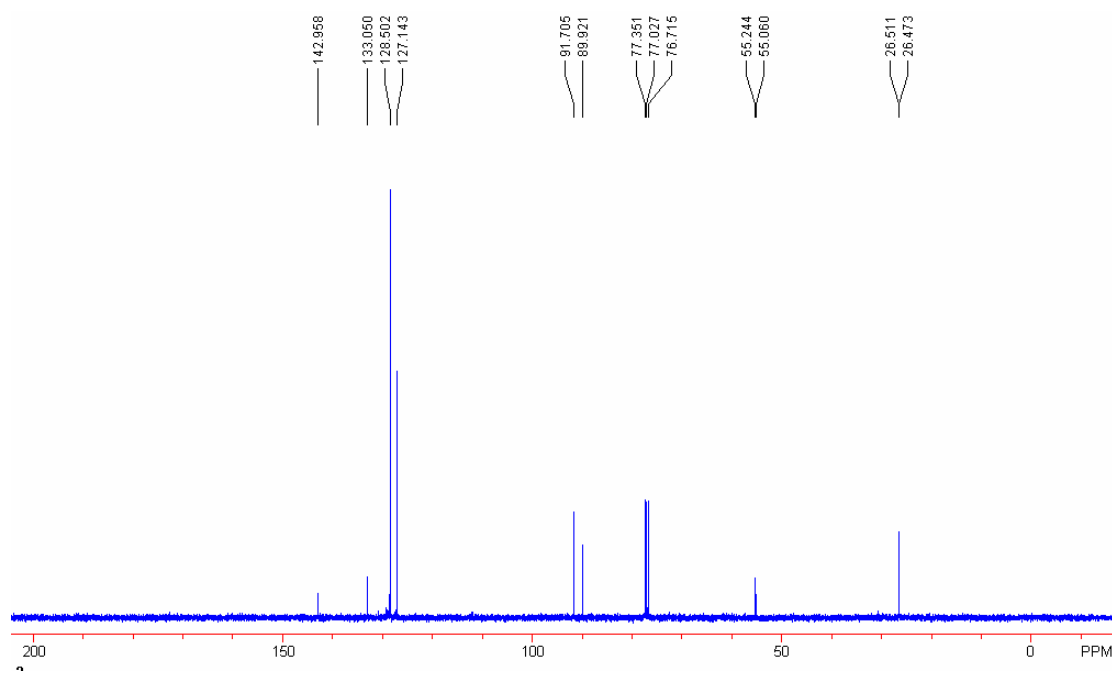

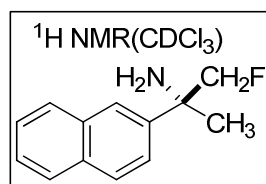

**11g**

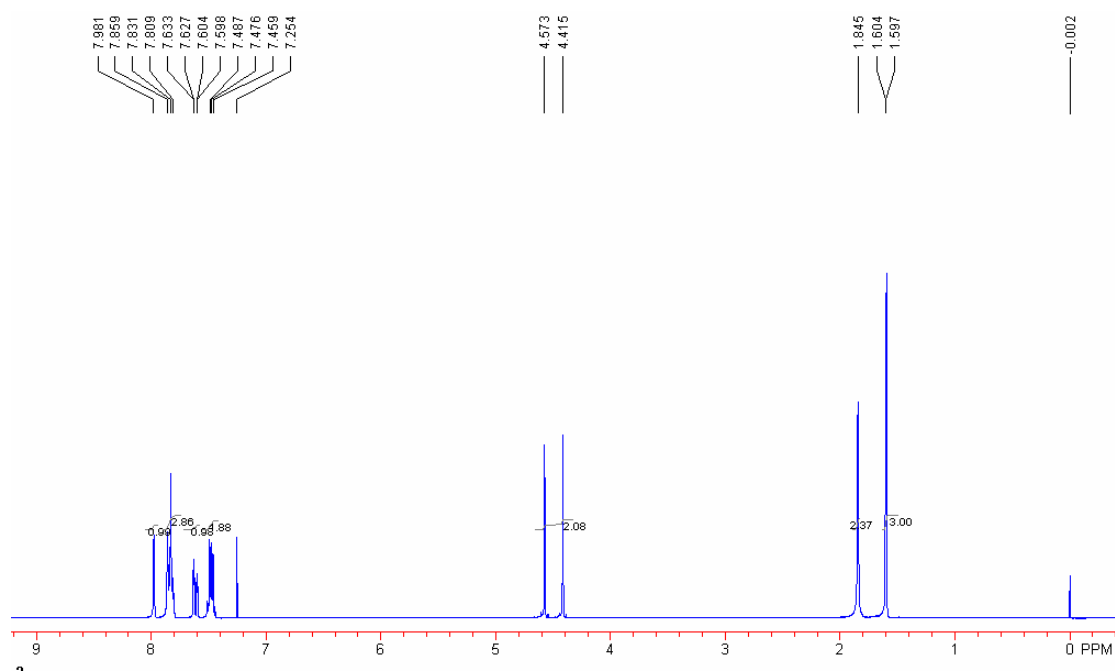

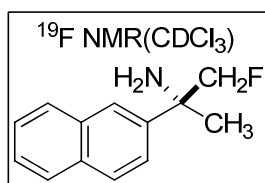

**11g**

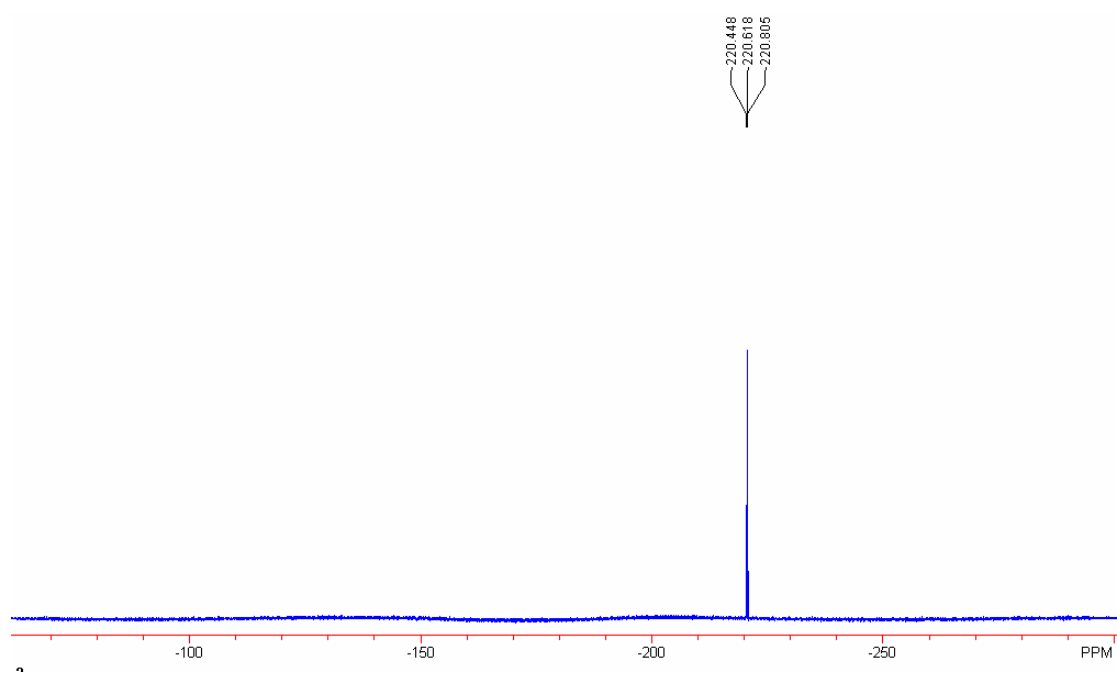

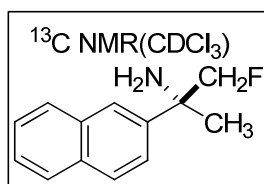

**11g**

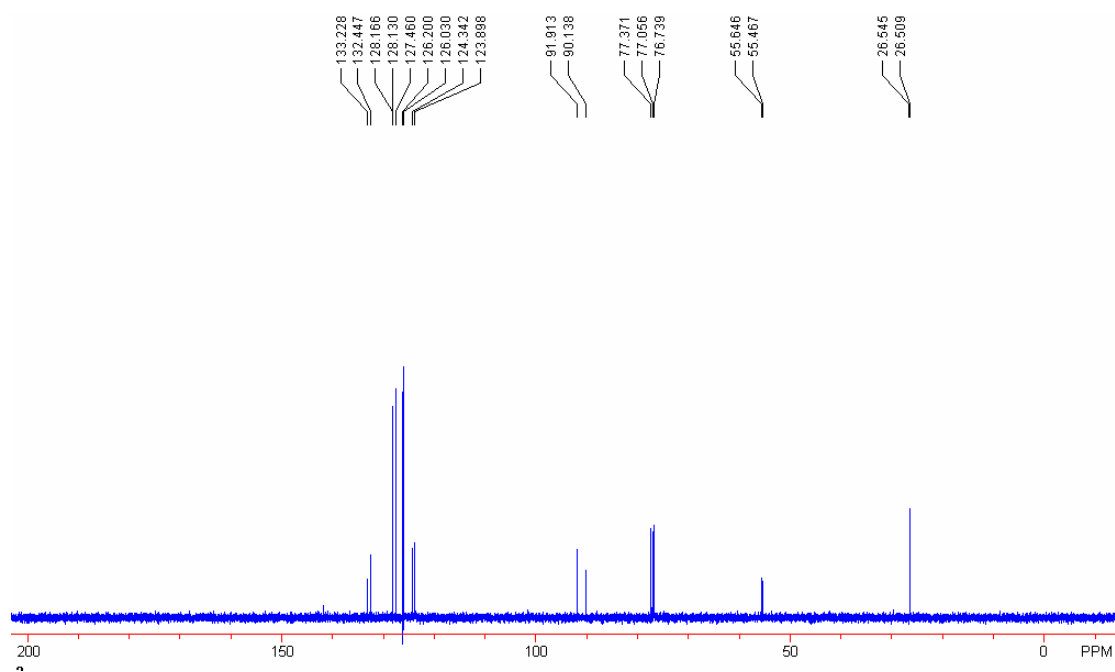

Supplement: Supplementary file 1 [file 4593370]
